# Supplementary material for: Structural variation and eQTL analysis in two experimental populations of chickens divergently selected for feather pecking behavior
Source: bioRxiv or medRxiv preprint supplement (doi:10.1101/2022.09.16.508210), 2022-09-17

Supplementary Information S2: Manhattan plots of expression genome wide associations studies conducted on genes, which were differentially expressed between high and low feather pecking chickens.

# ACAN

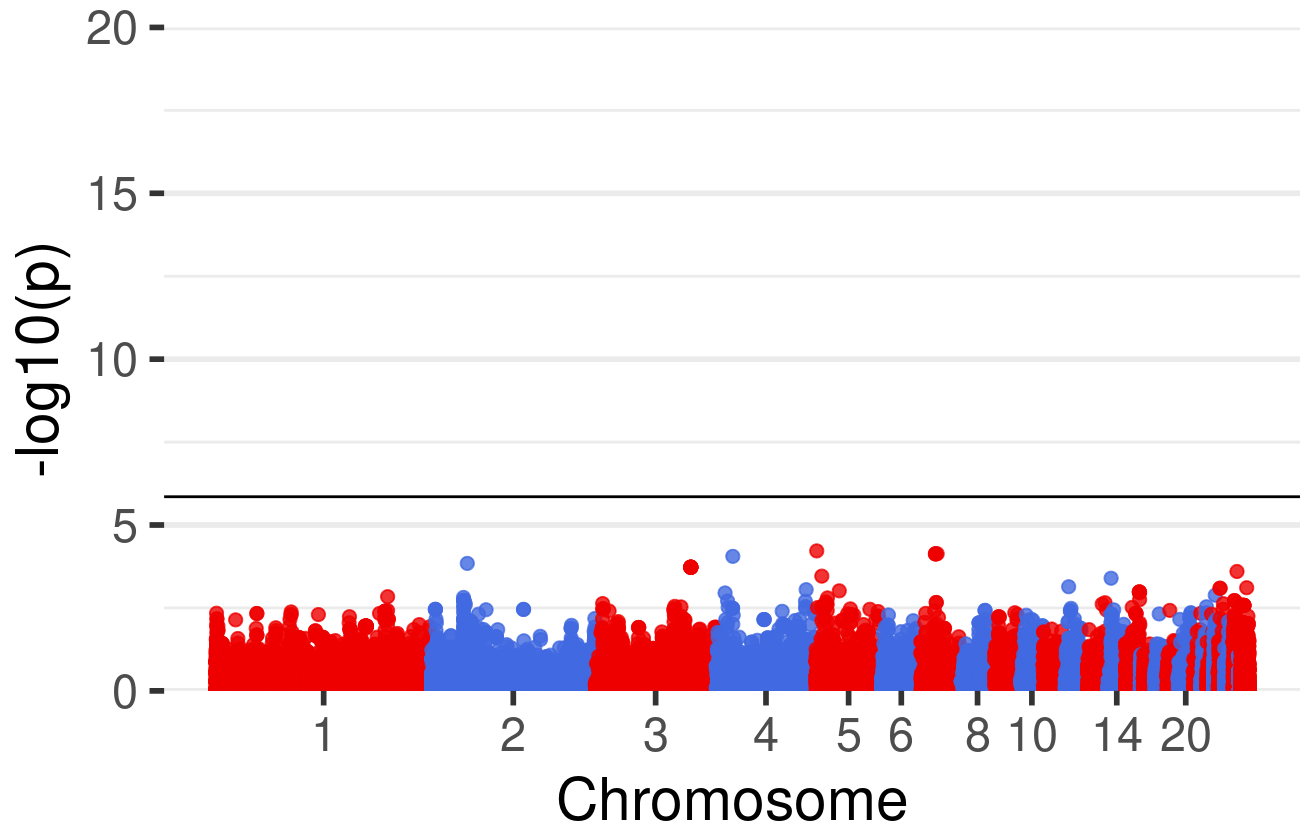

# ACTB

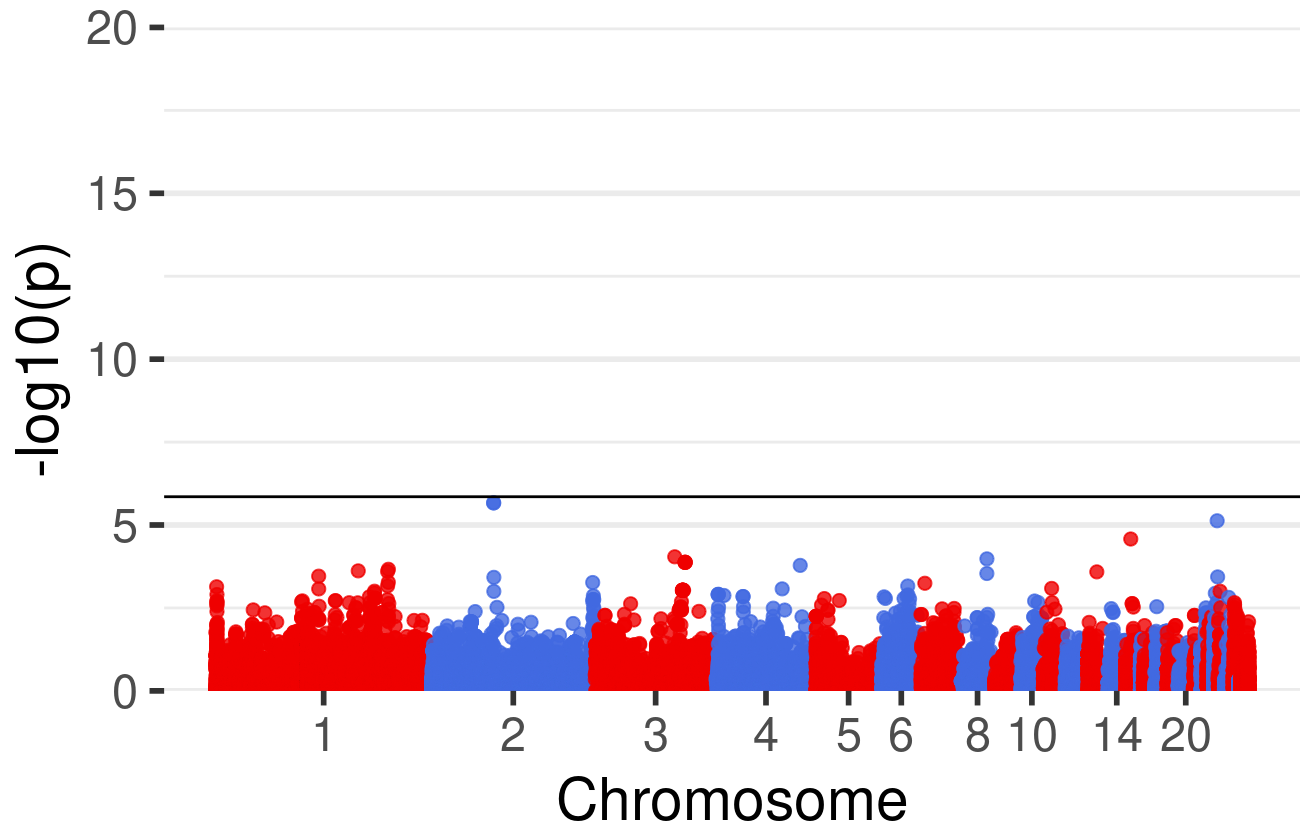

# ADGRG4

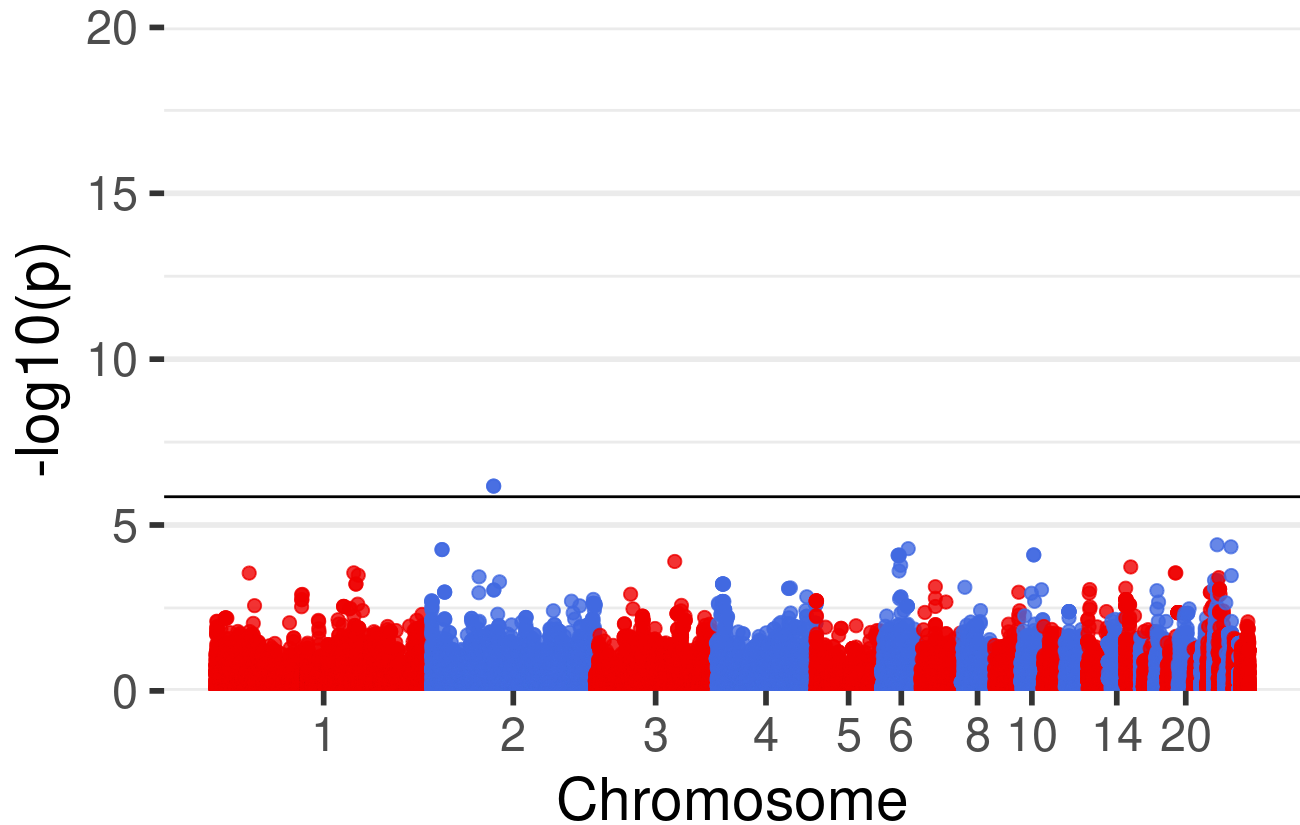

# ANGPTL7

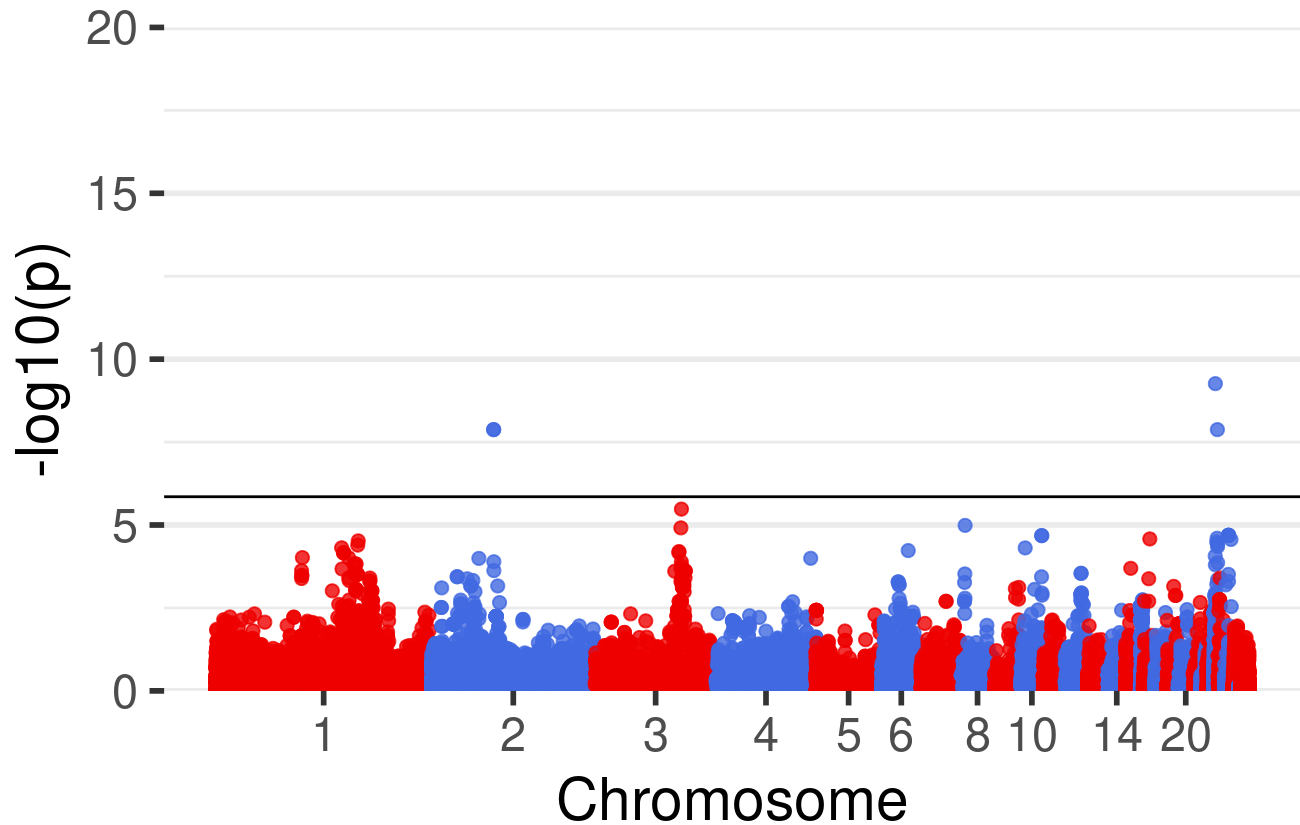

# ATP8B3

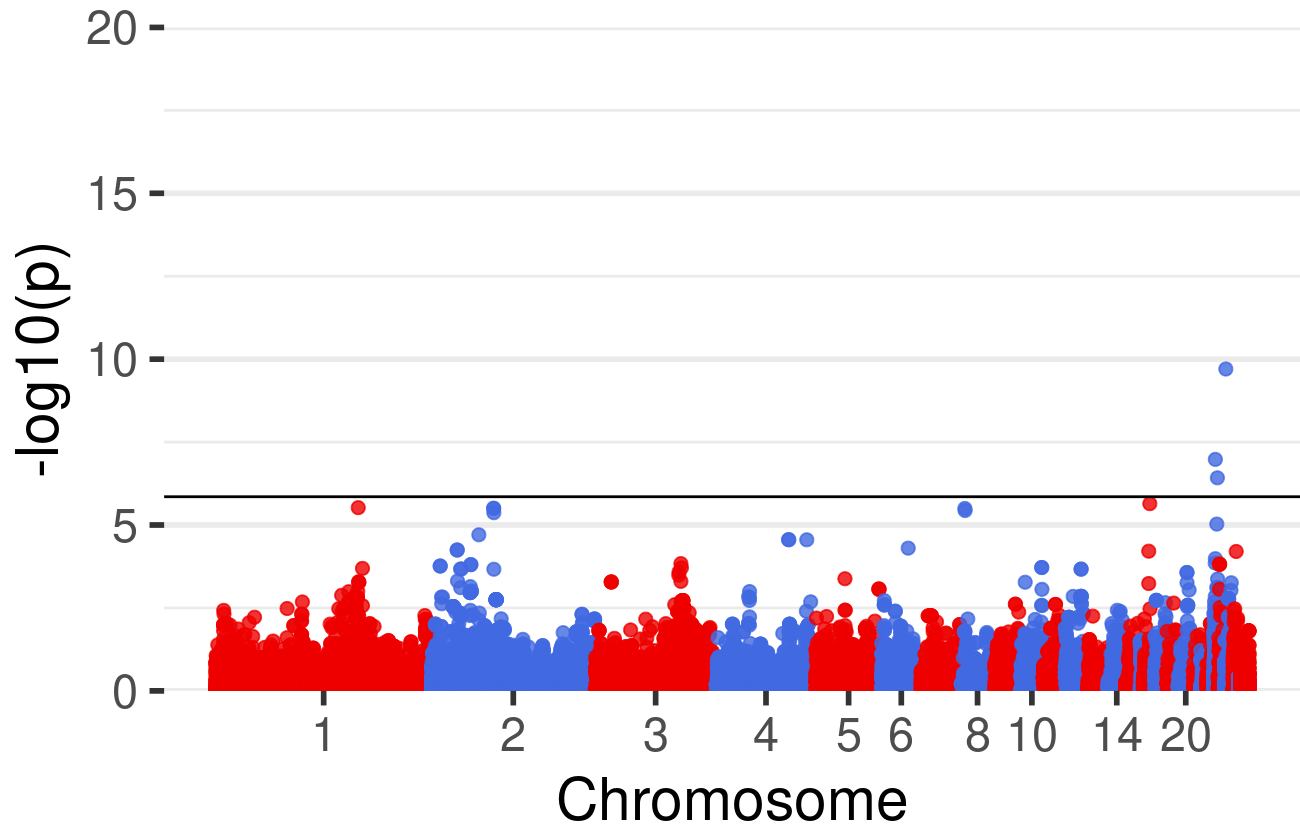

# AvBD4

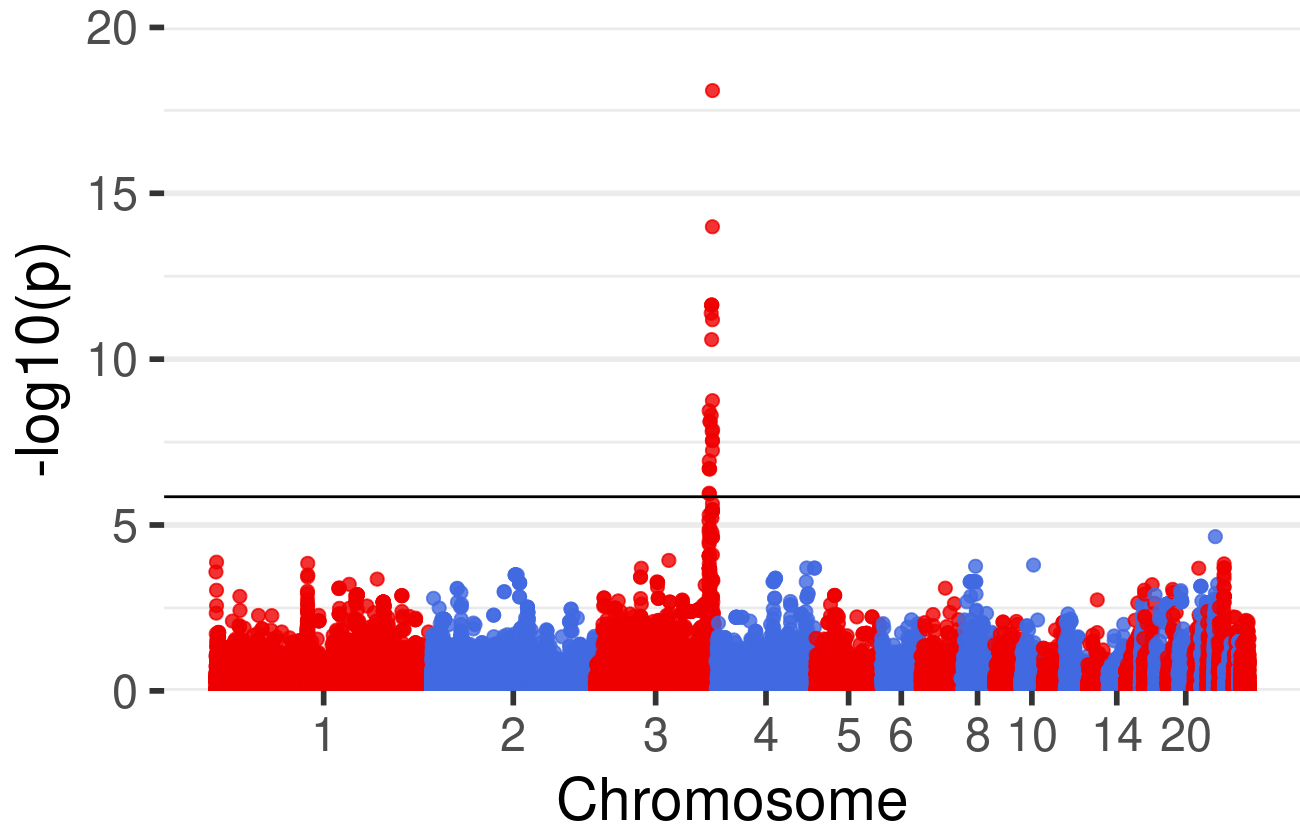

# BLEC2

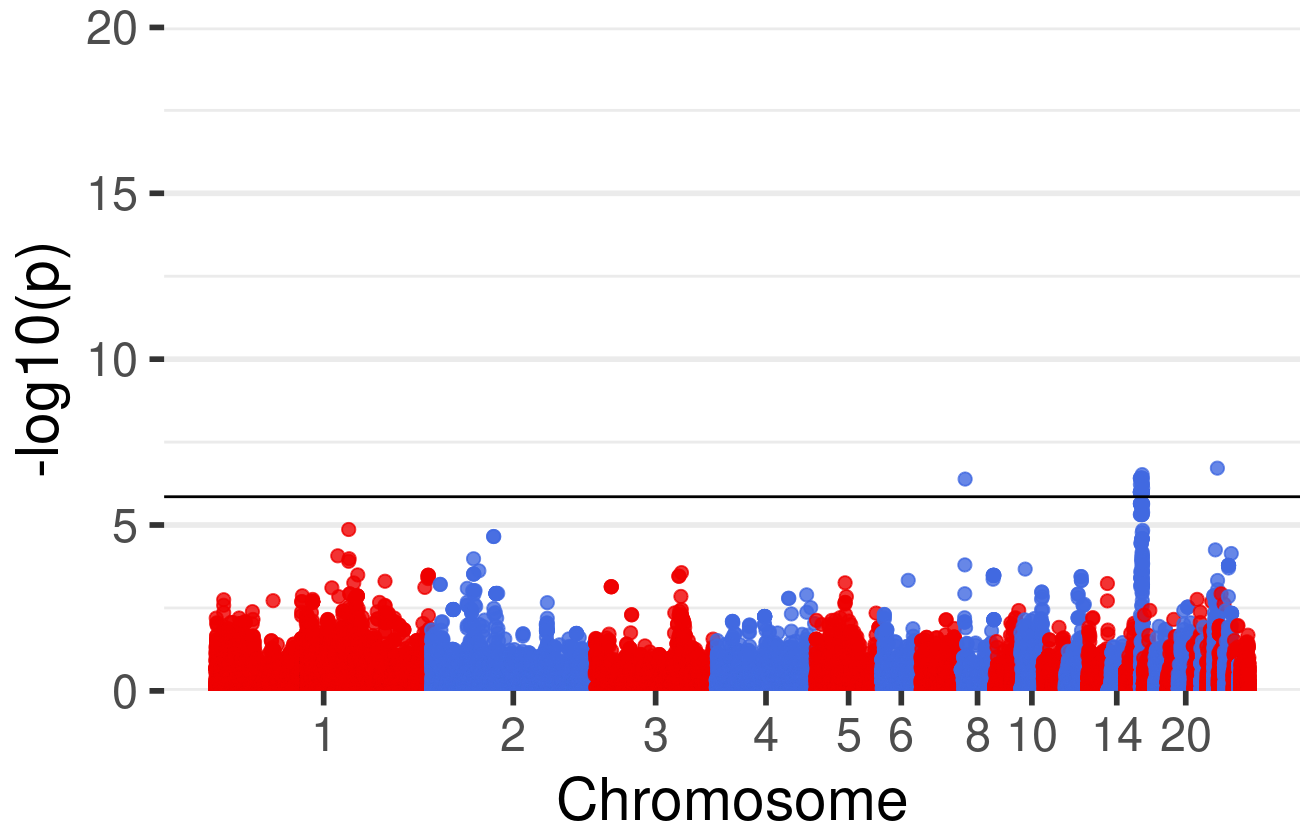



# BTN3A3L2

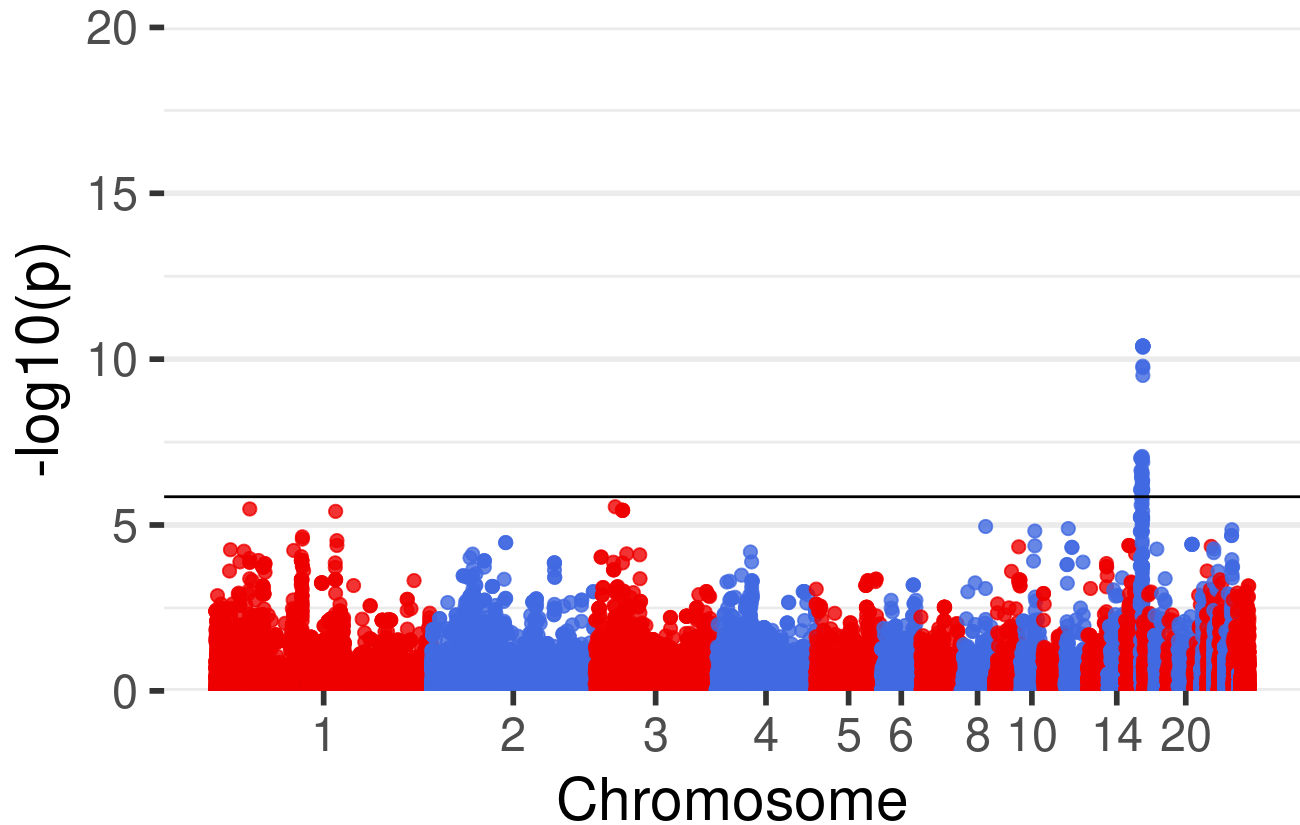

# CERS4L

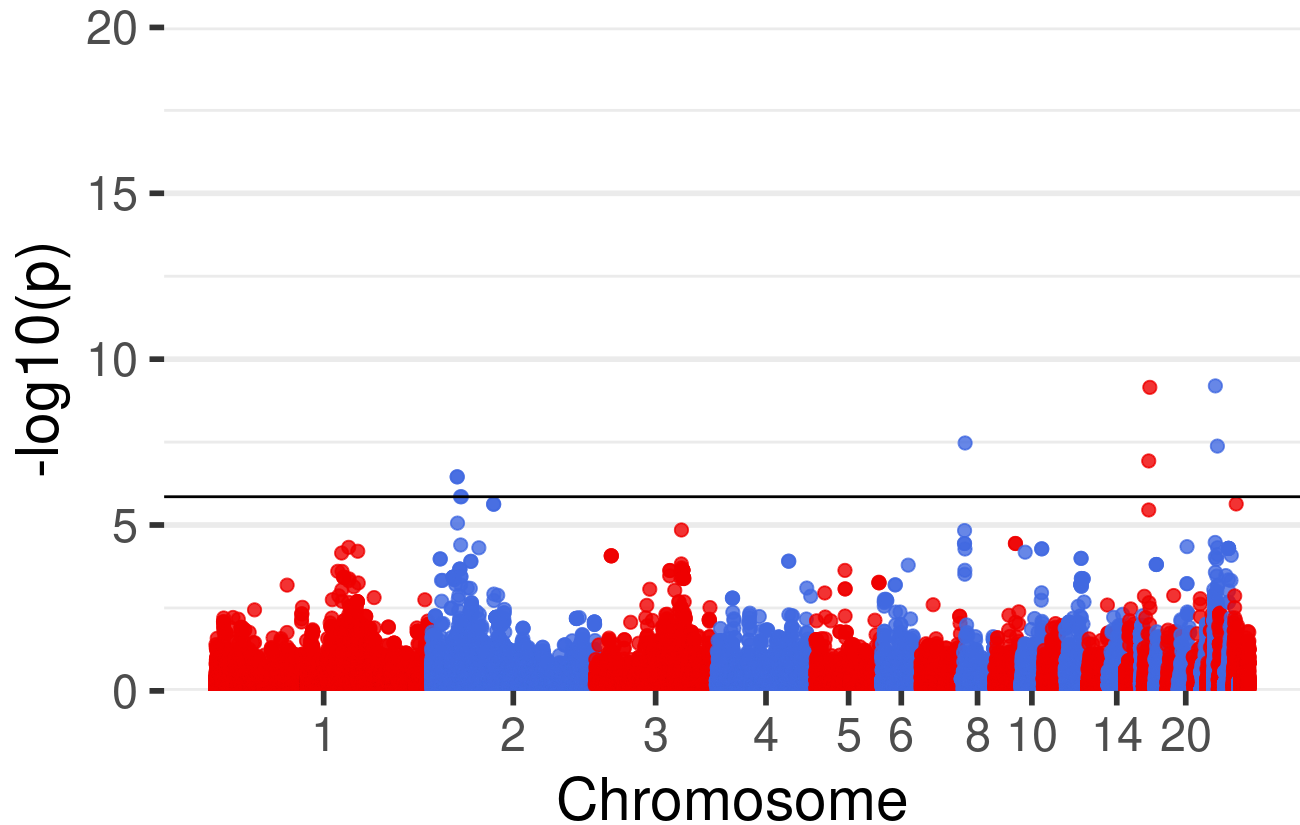

# CHDSD

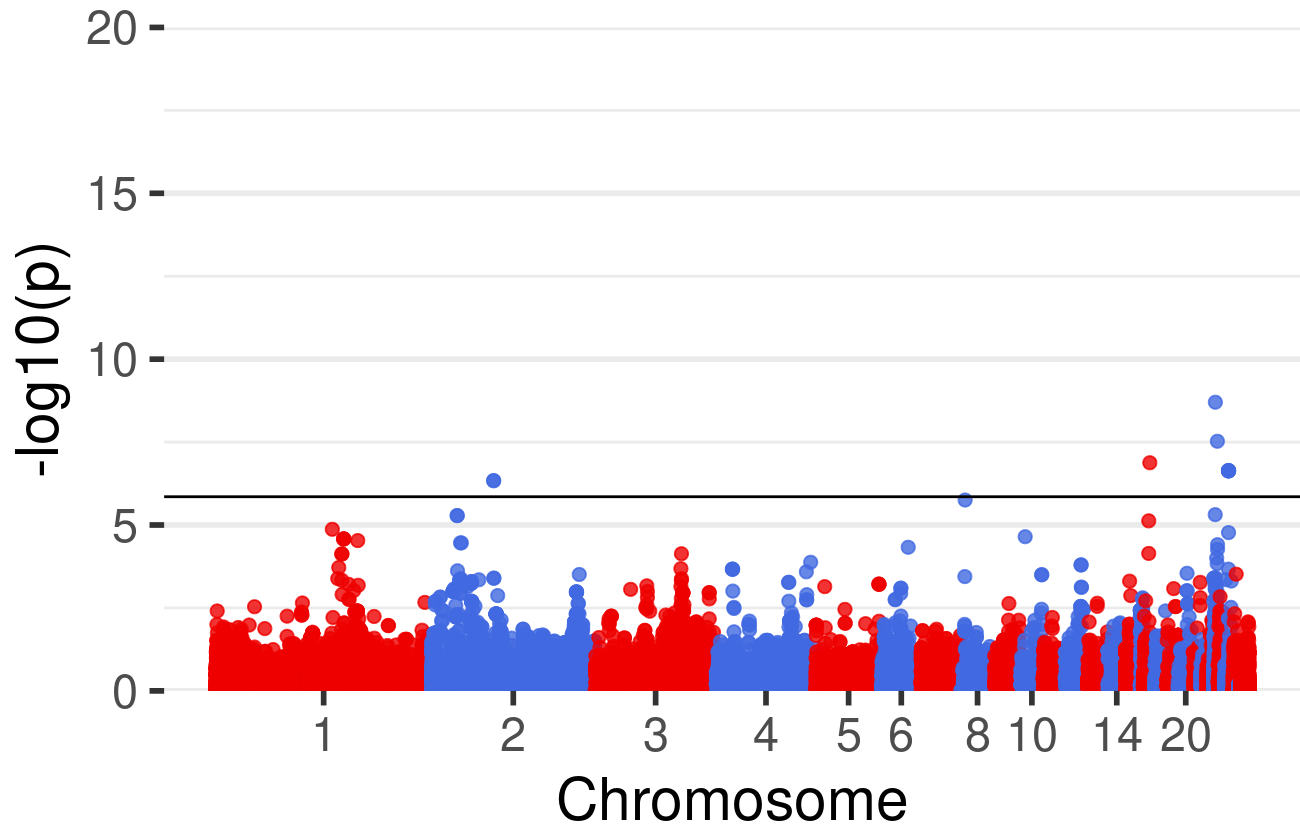

# CHIR.IG1.5

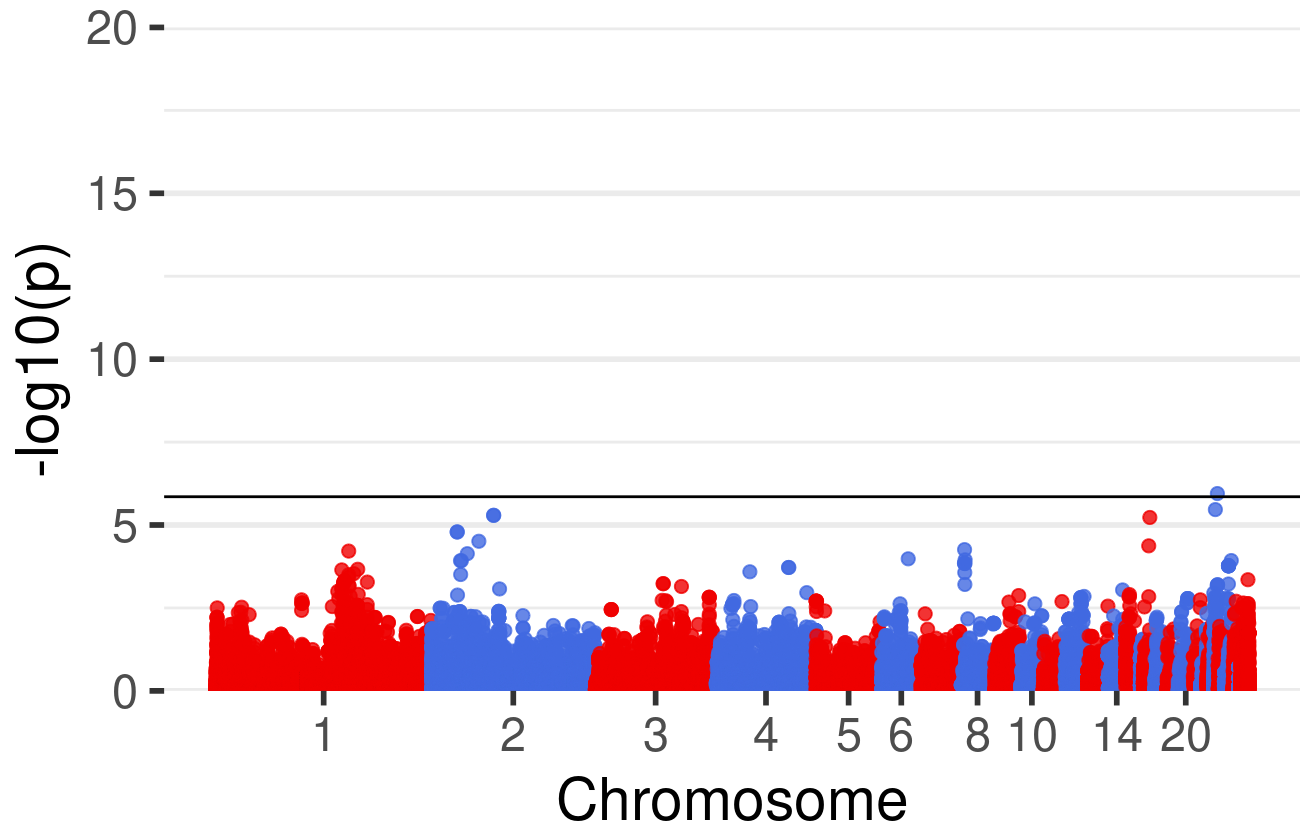

# CLC2DL2

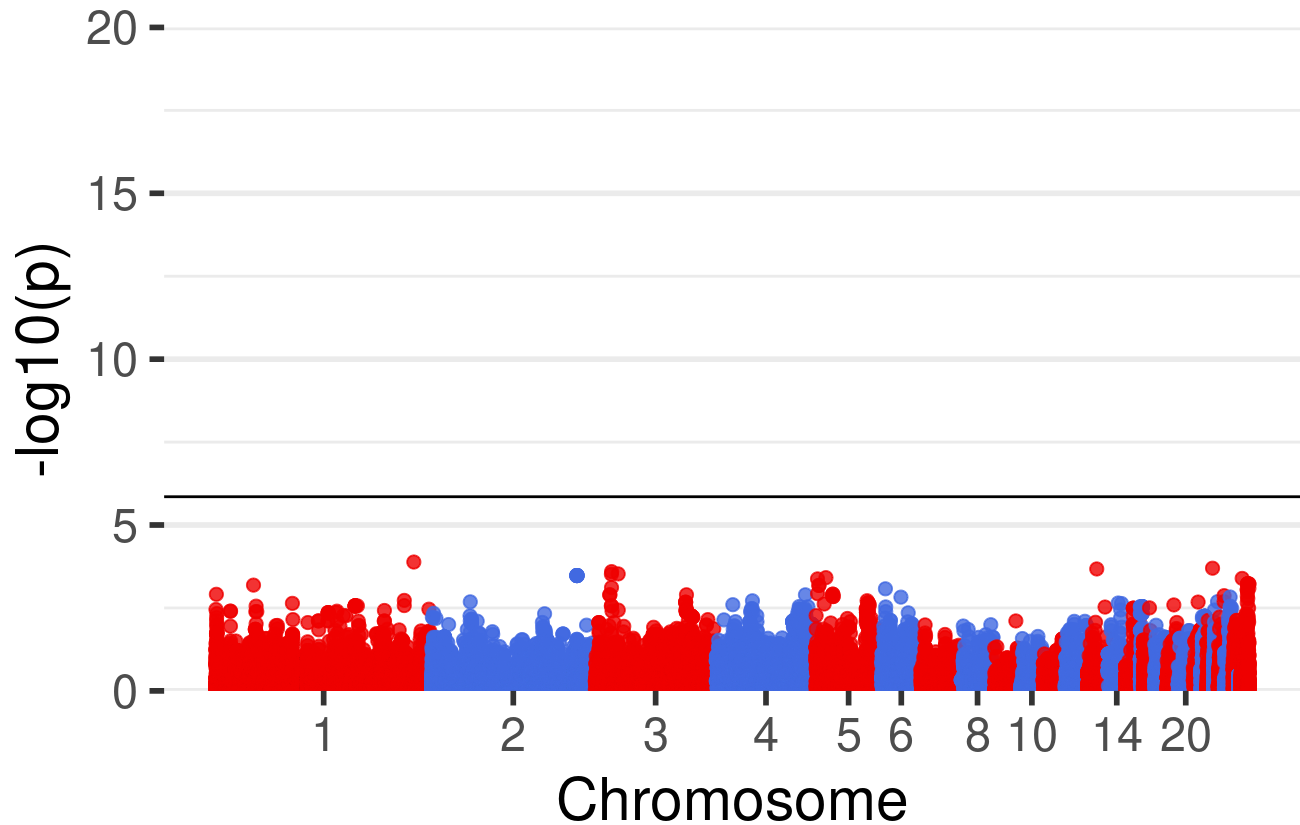

# CLEC2D2L

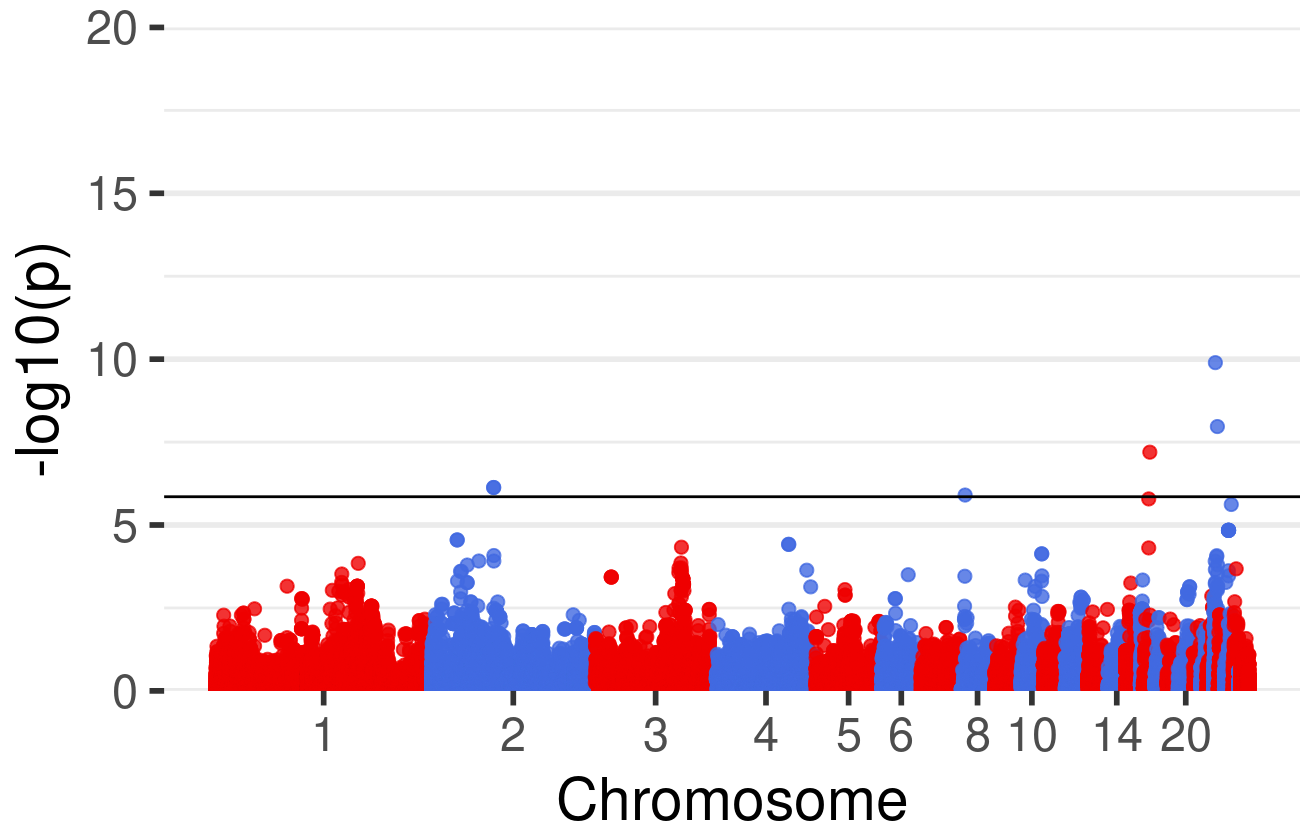

# COL7A1L

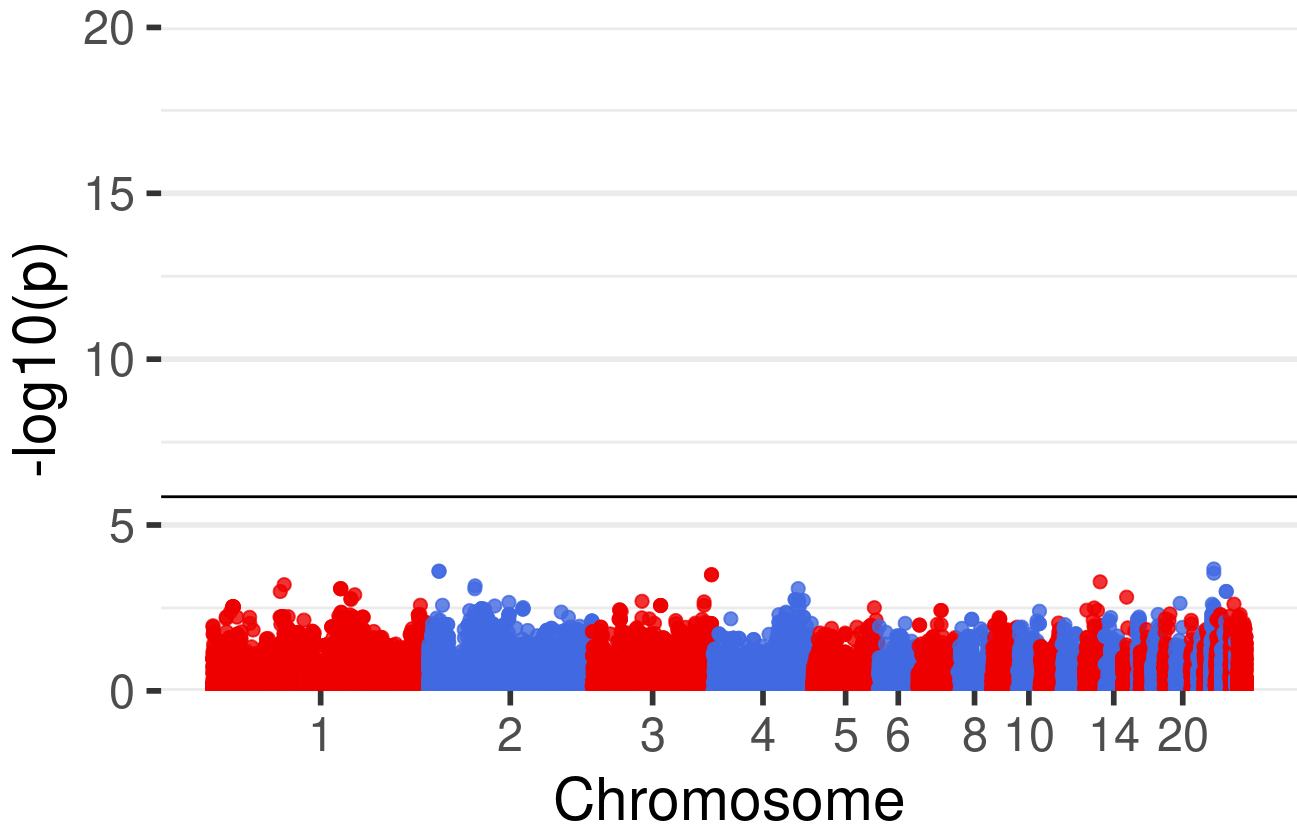

# CSF2RB

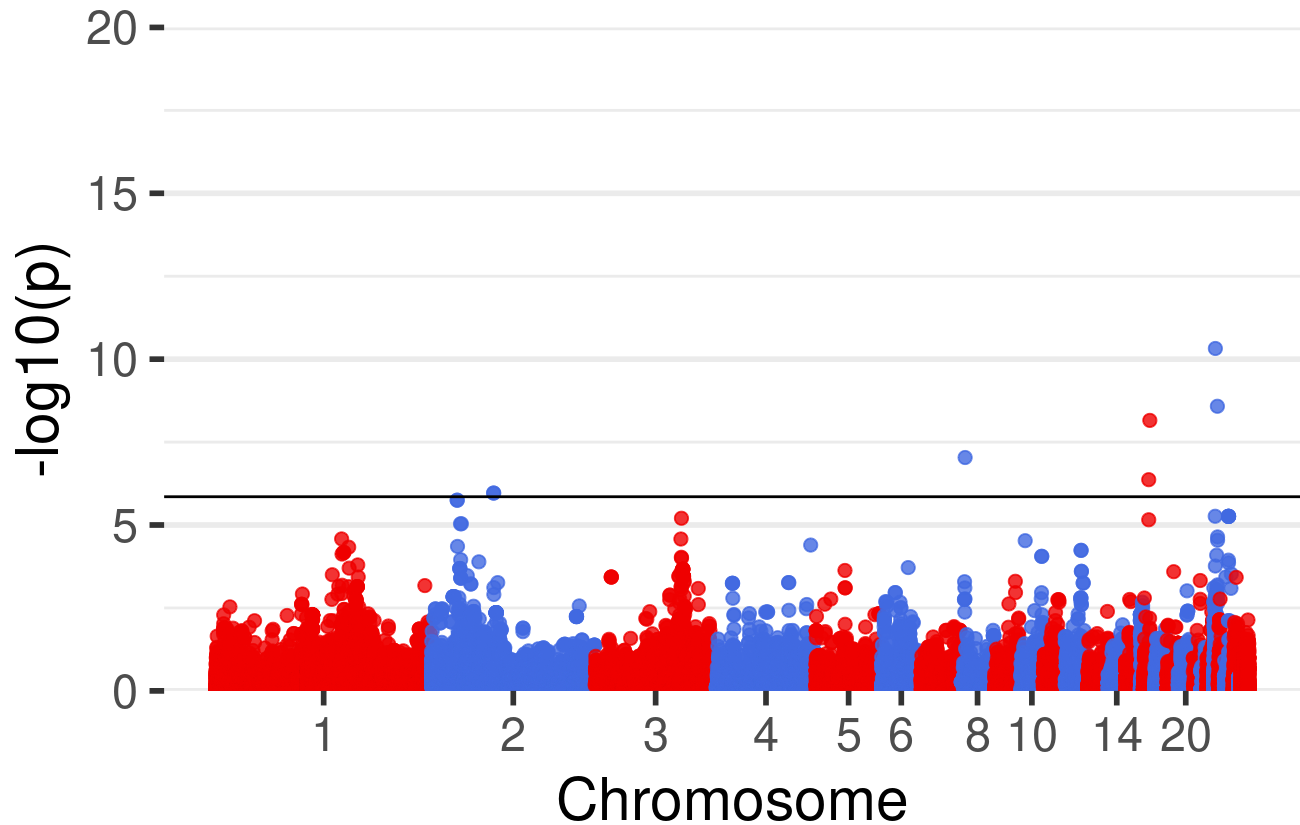



# GLRA1

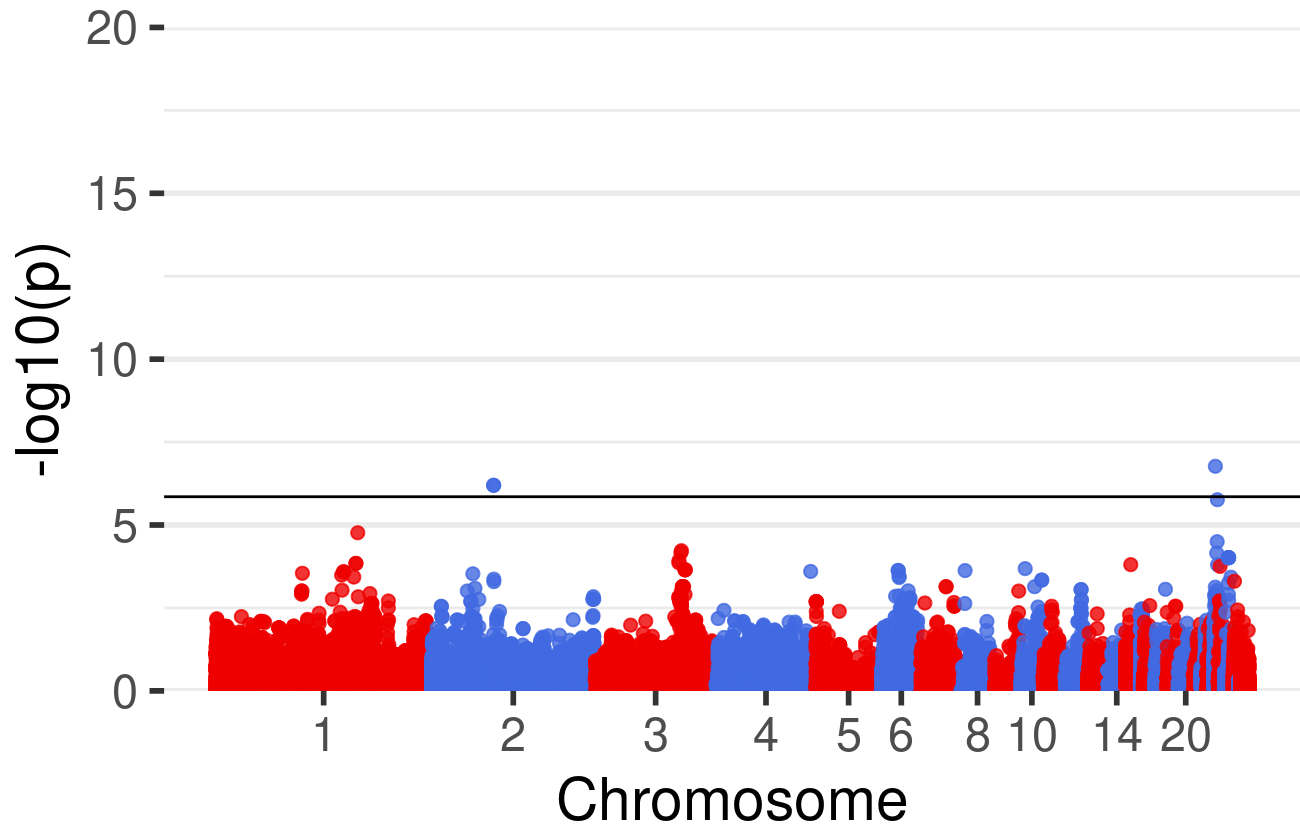

# HEATR7B2L2

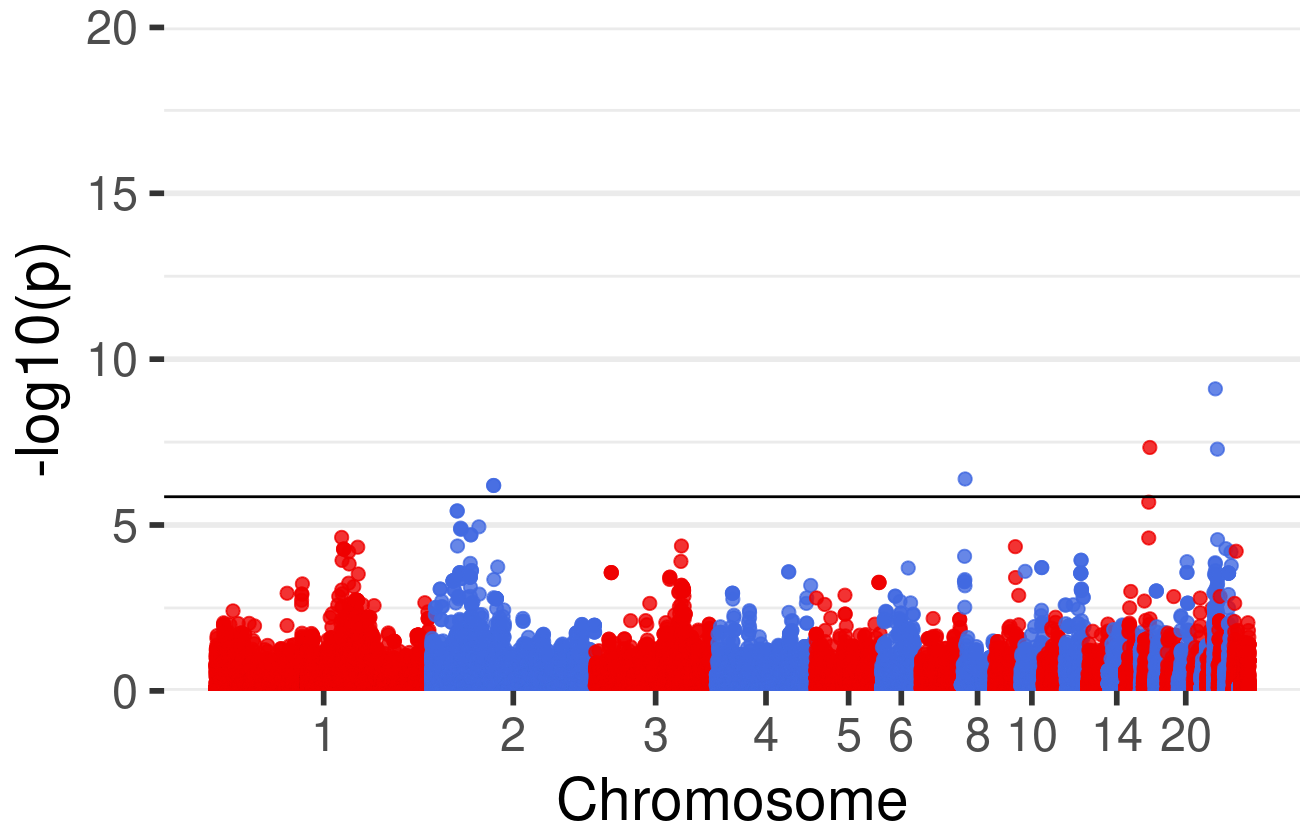

# HLA.F10AL1

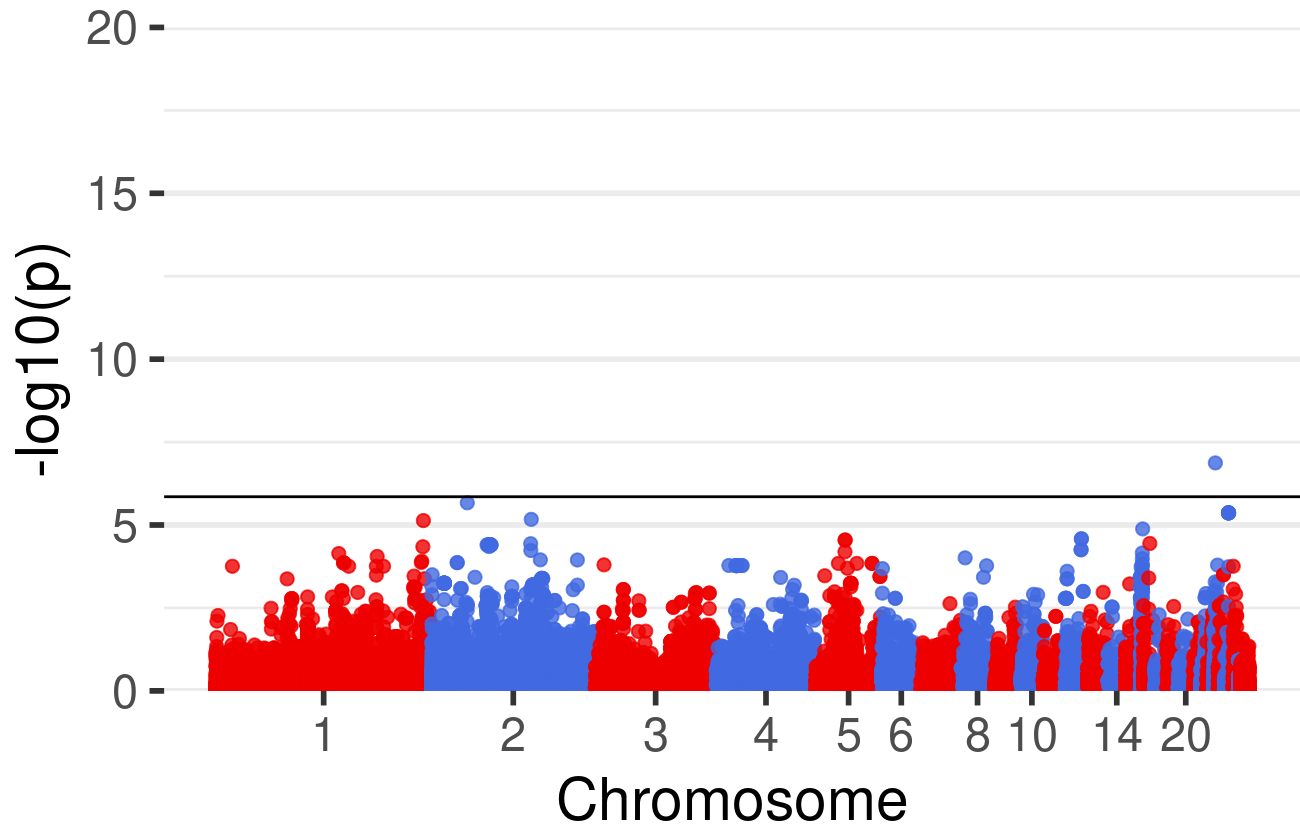

# HLA.F10AL3

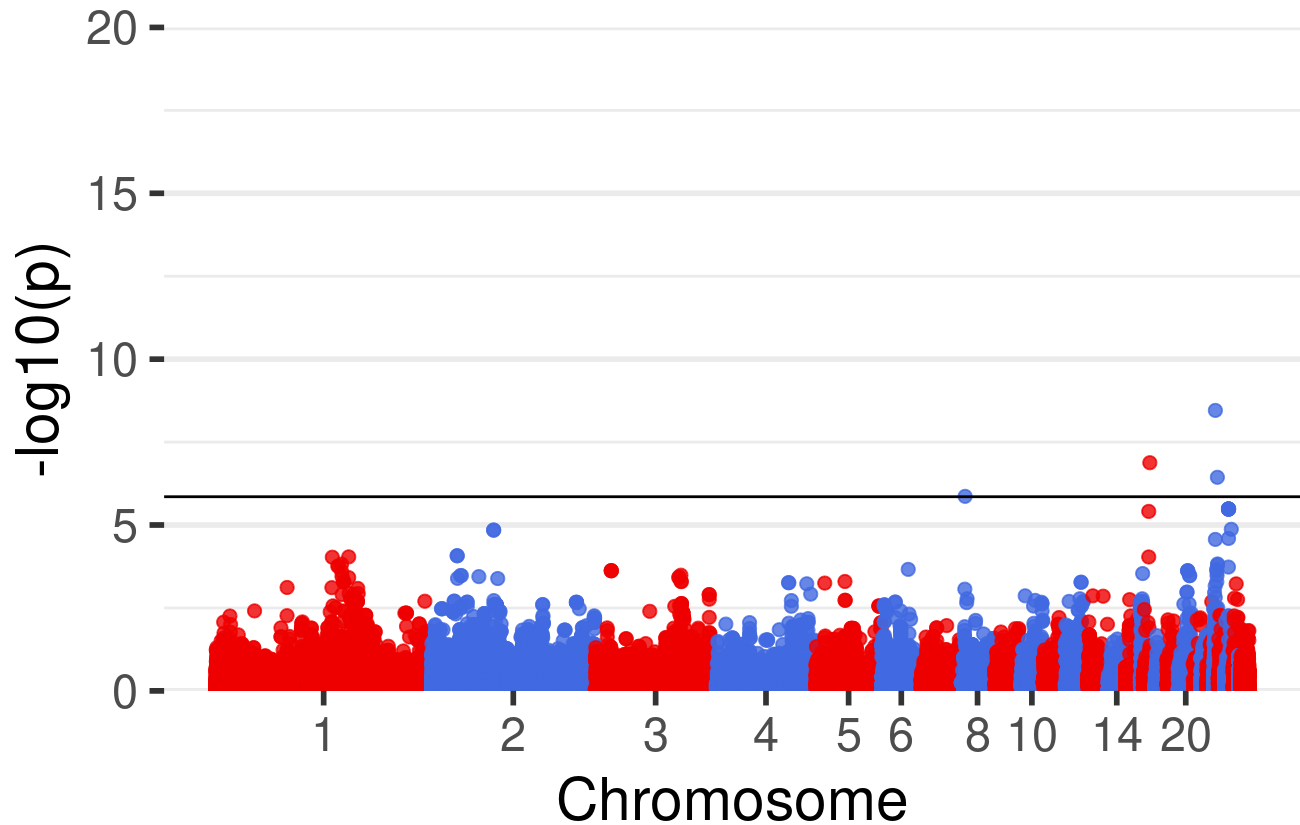

# HLA.F10AL4

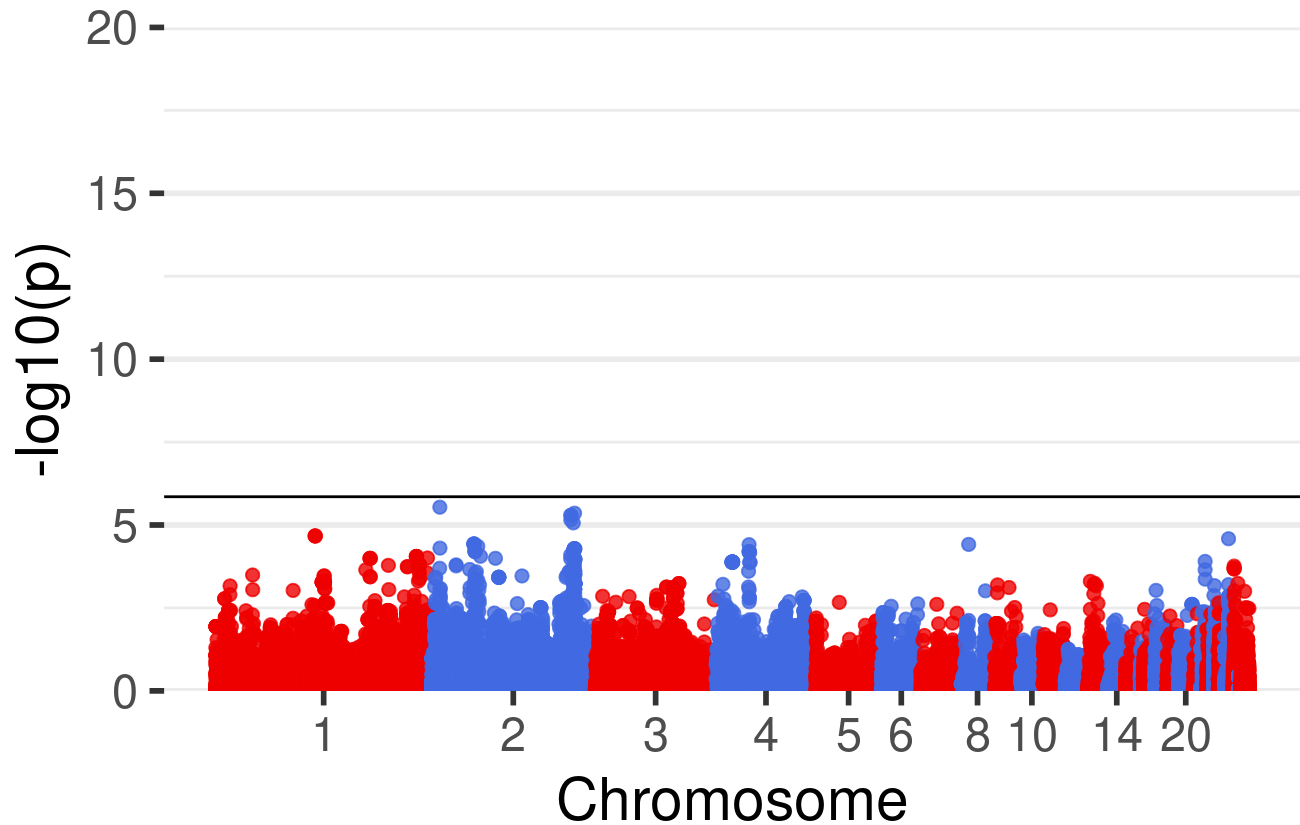

# KIFC1

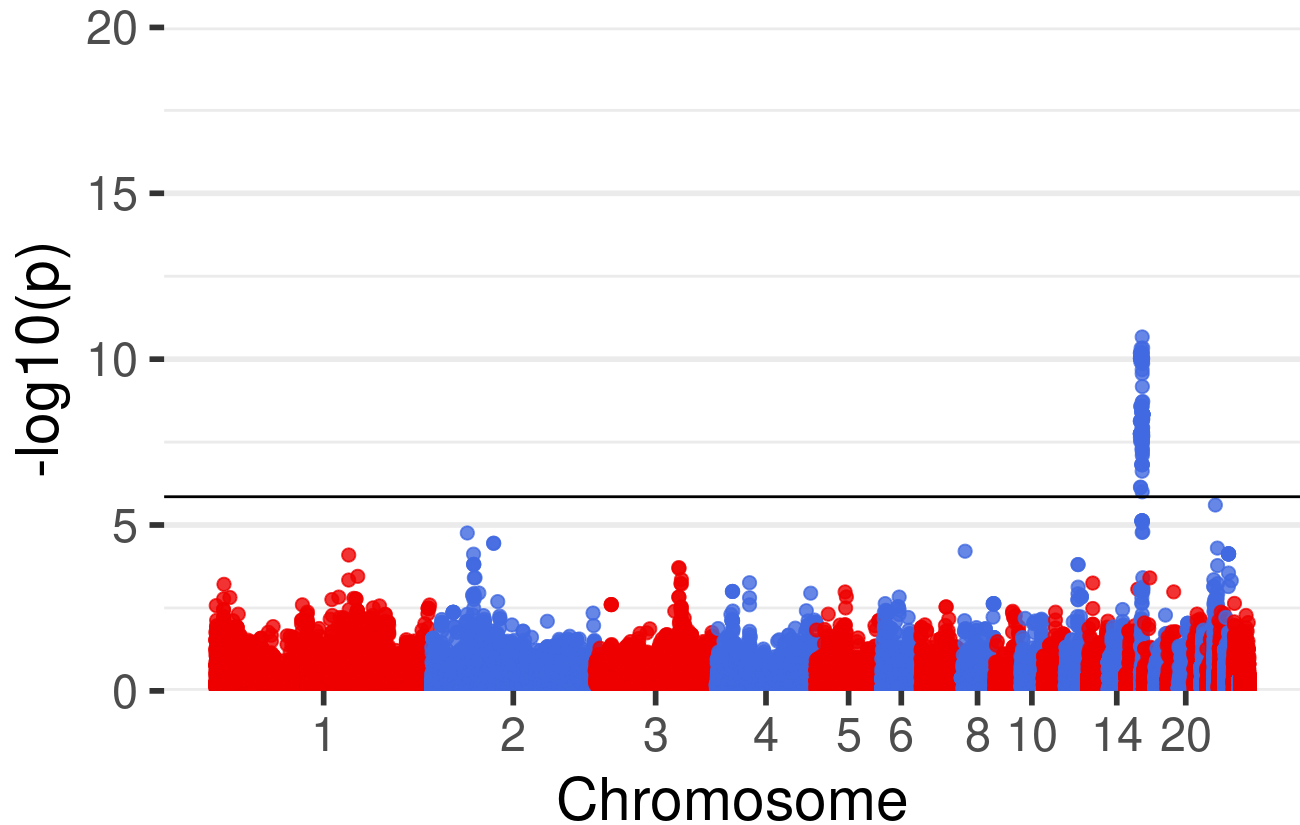

# KIFC1L

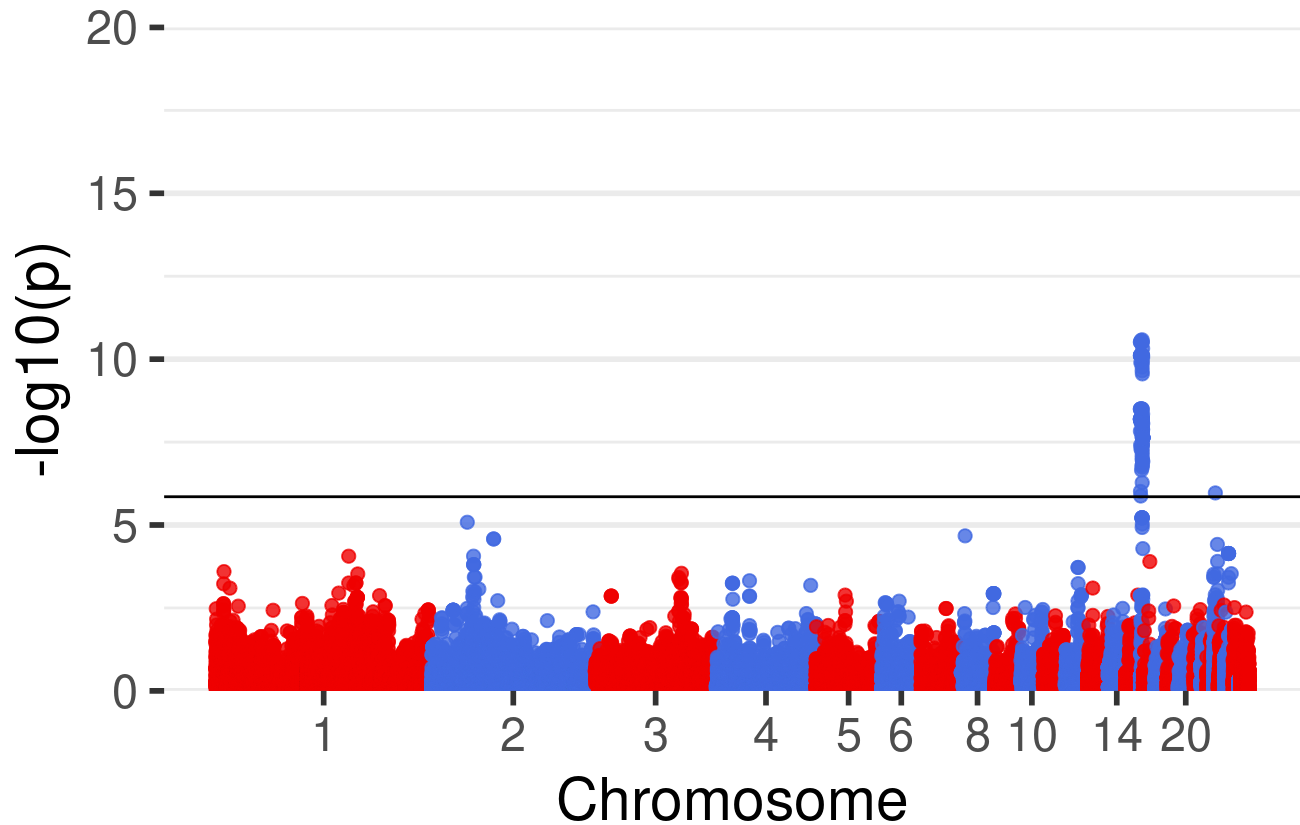

# LGSN

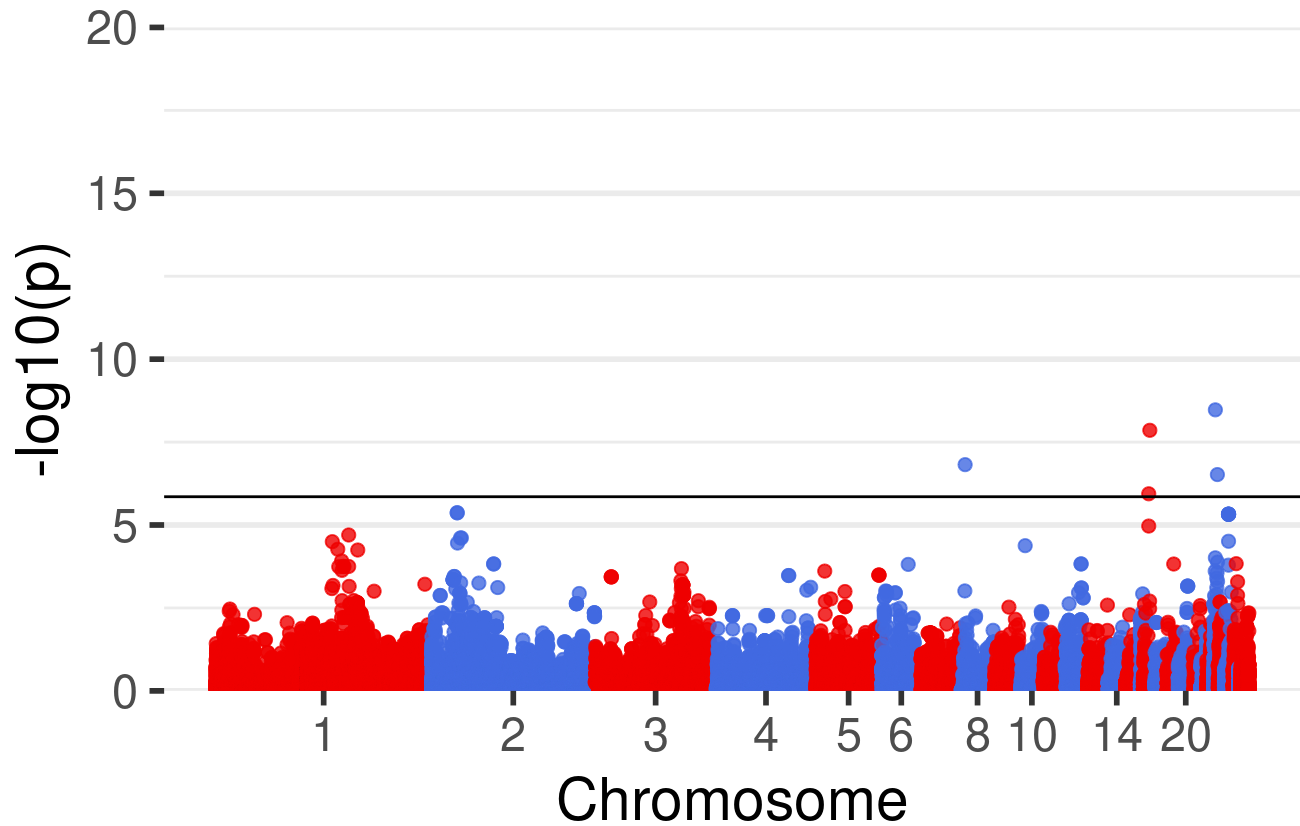



# LOC100857964

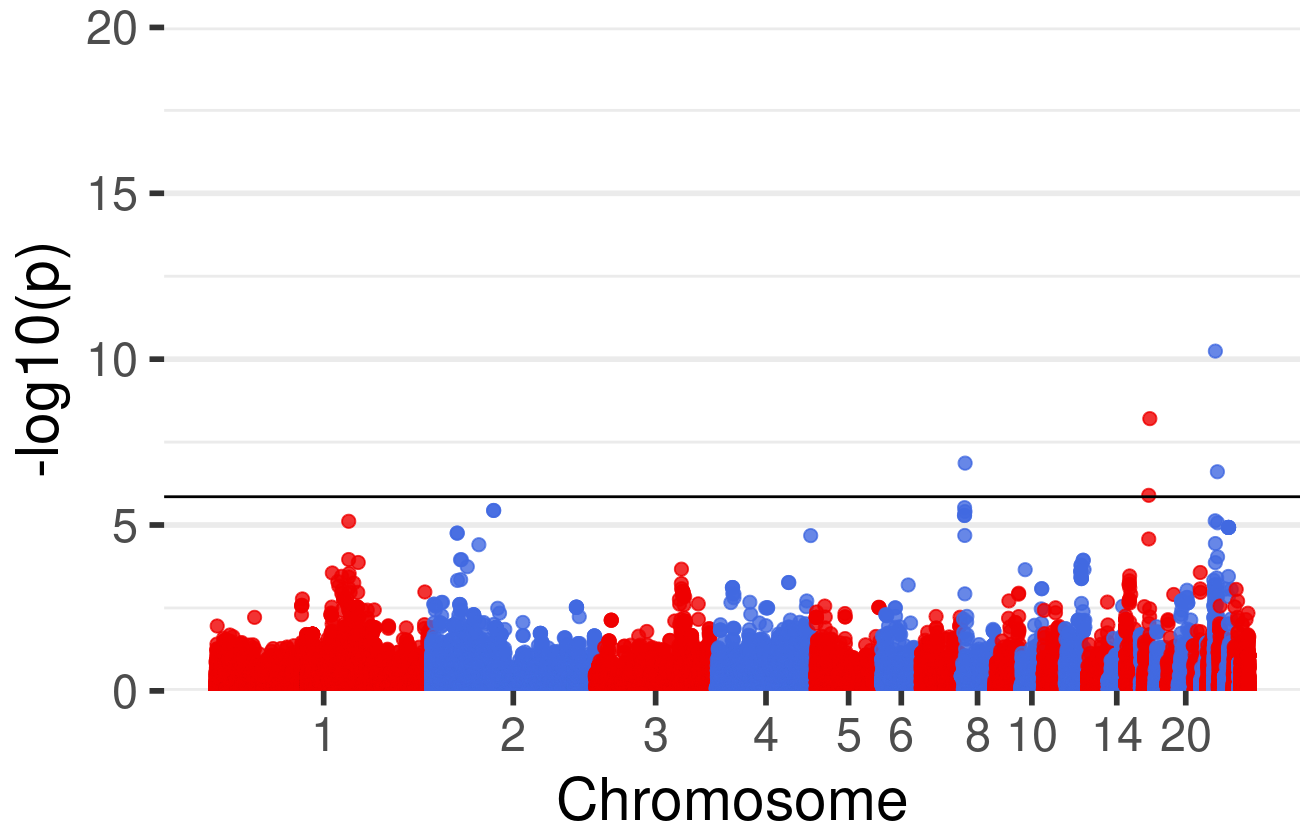

# LOC100858295

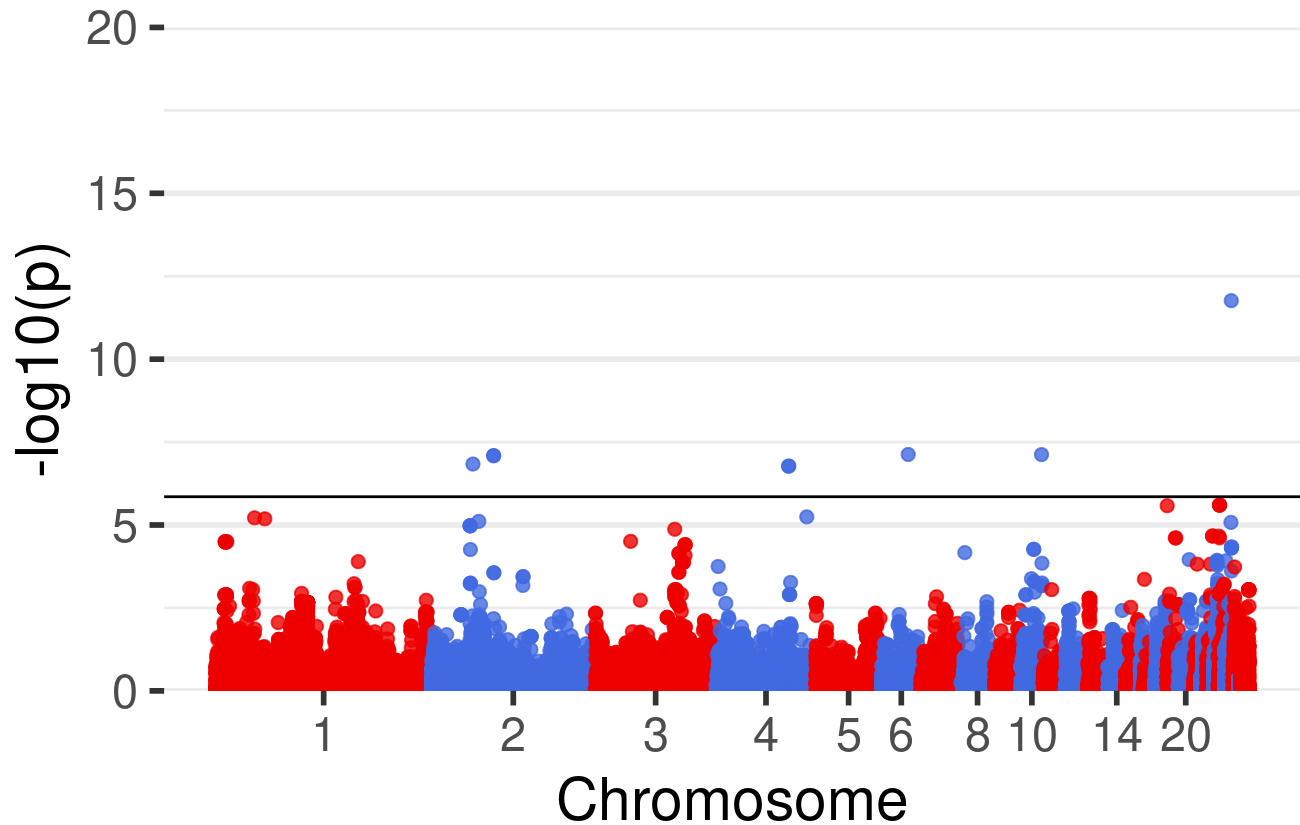

# LOC101747302

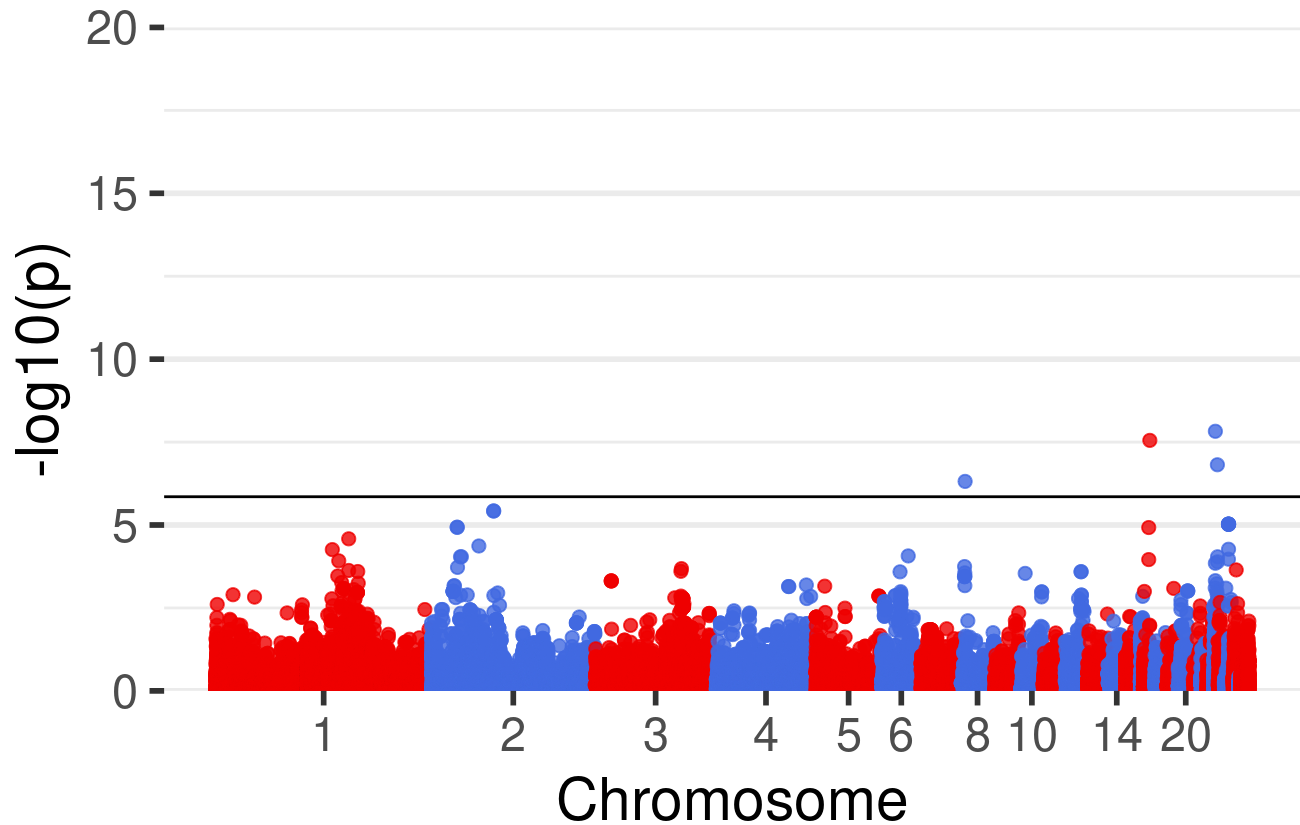

# LOC101749318

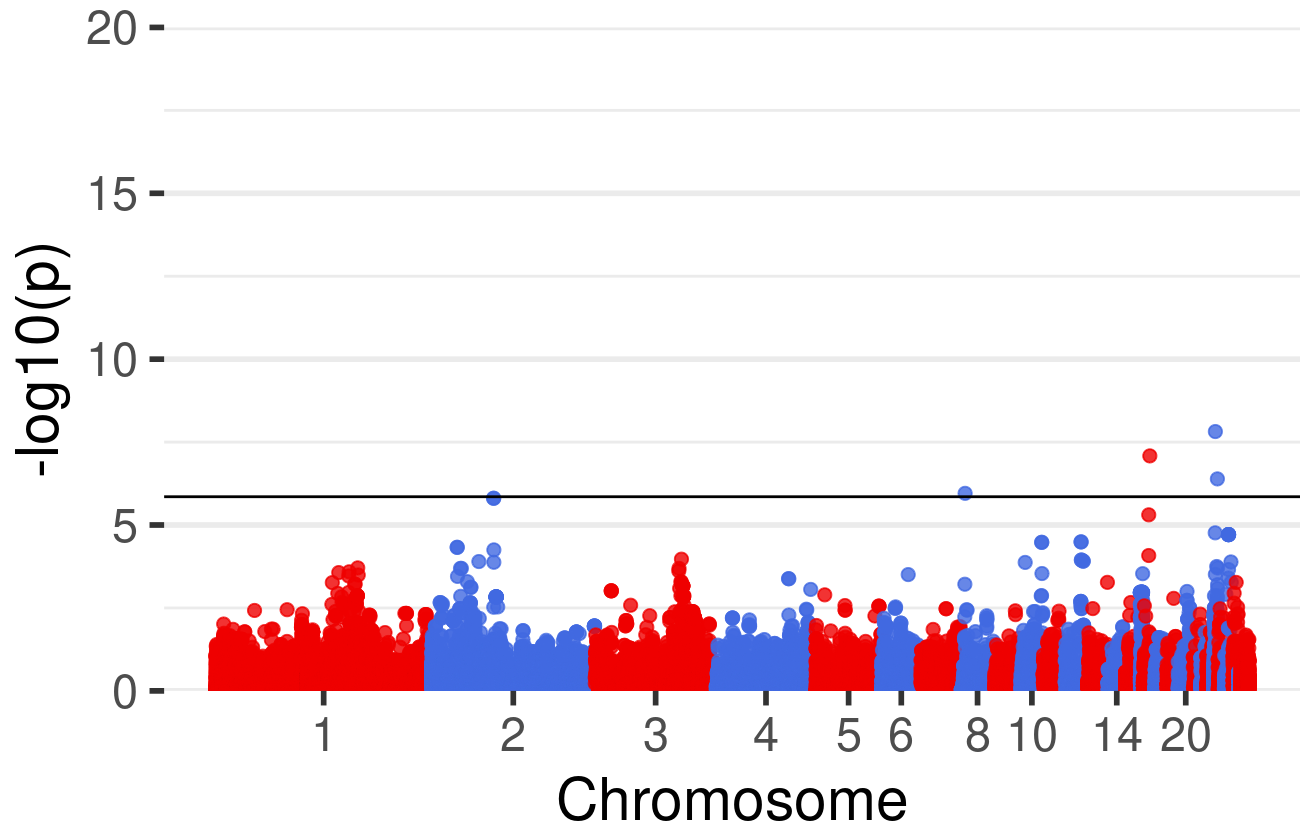

# LOC101749515

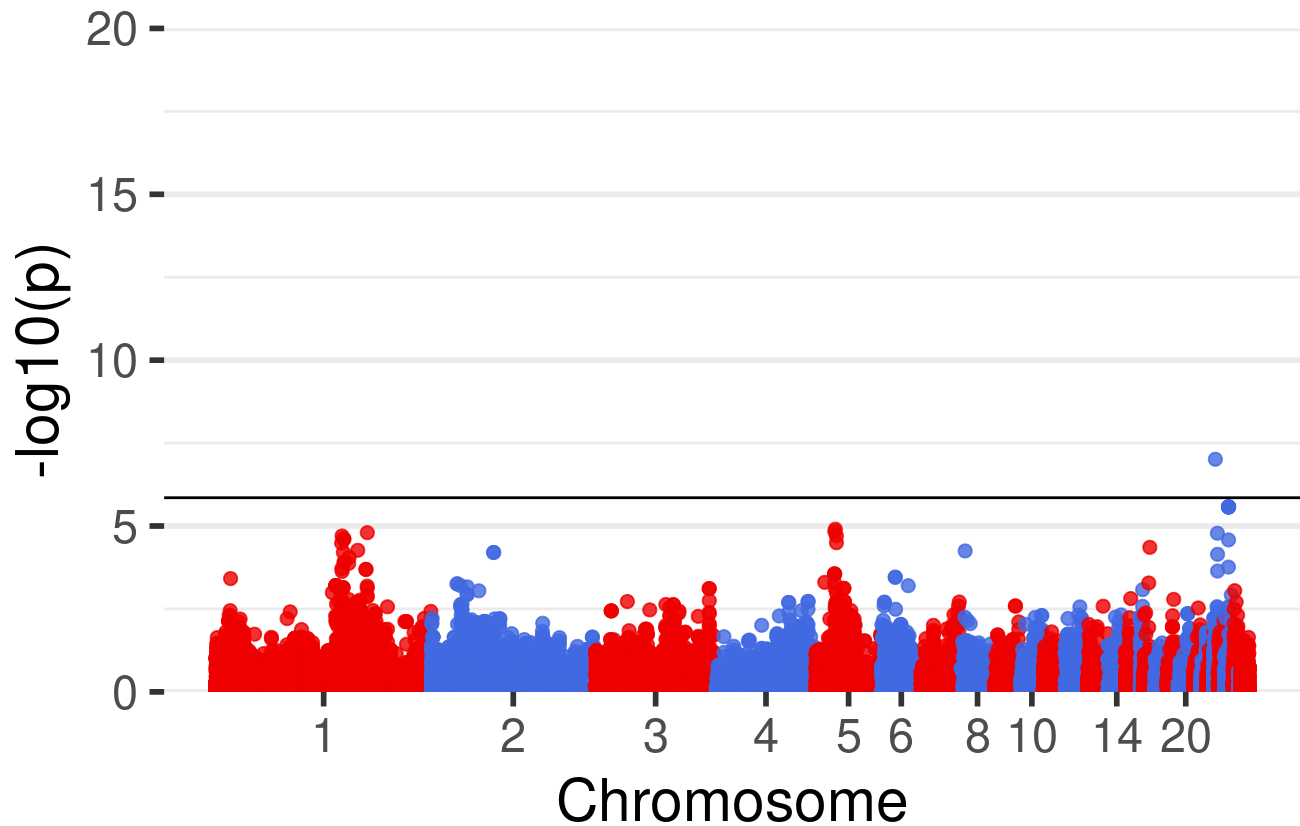

# LOC101749885

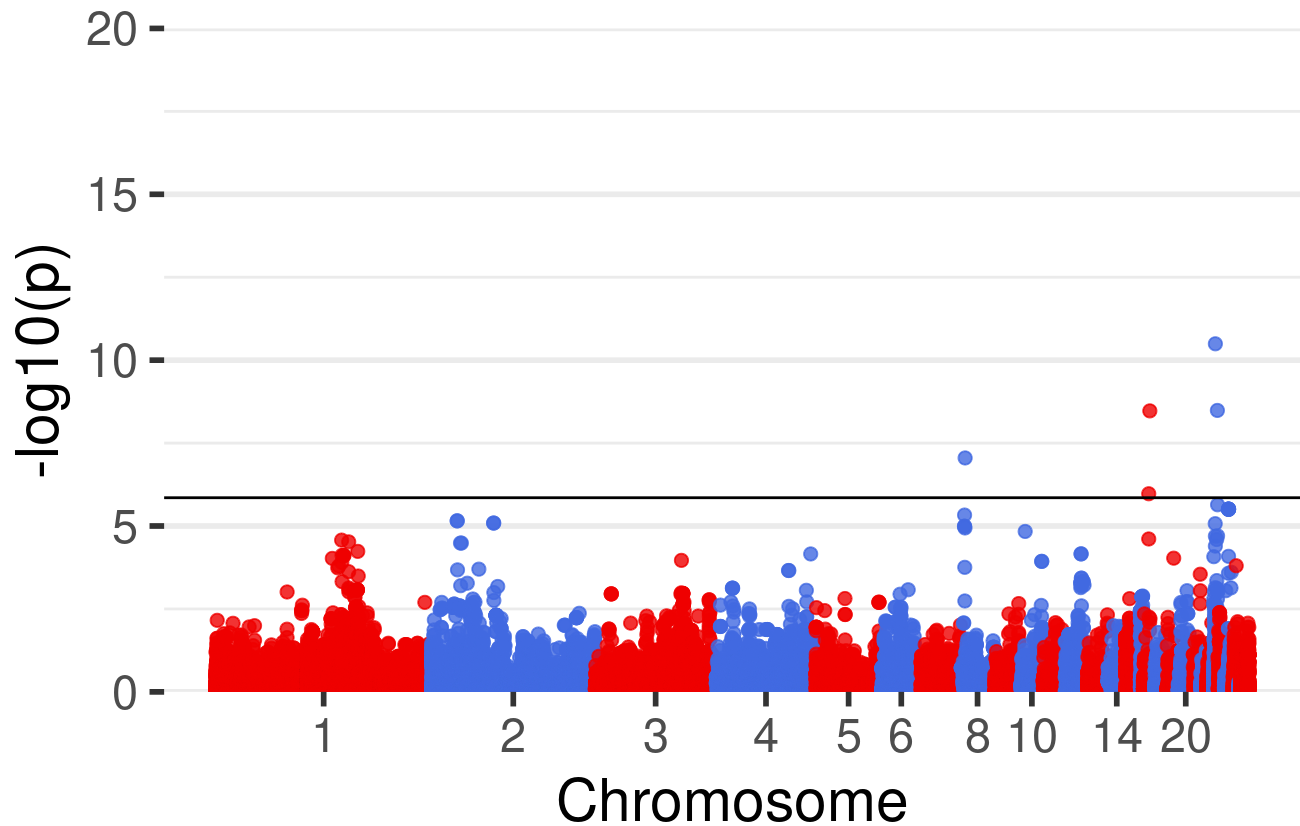

# LOC101750607

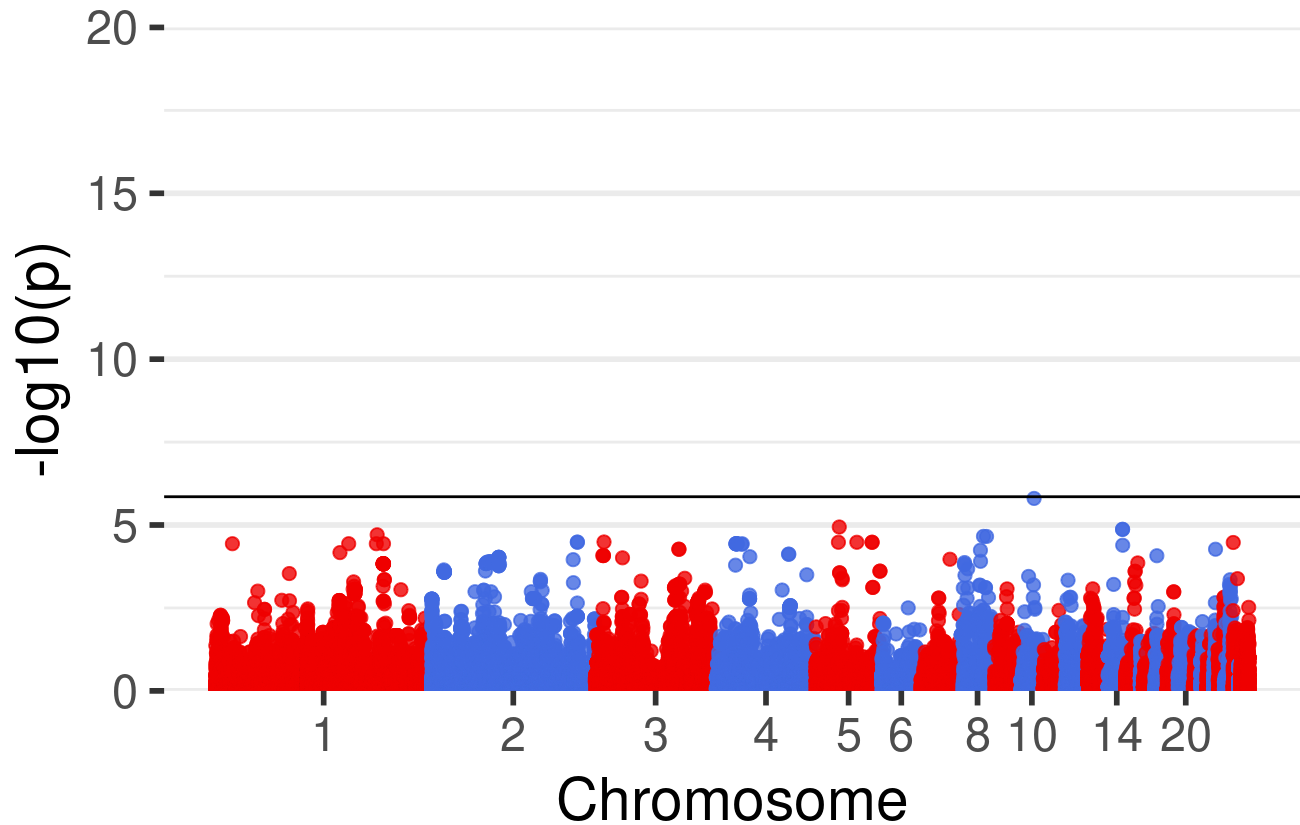

# LOC101751234

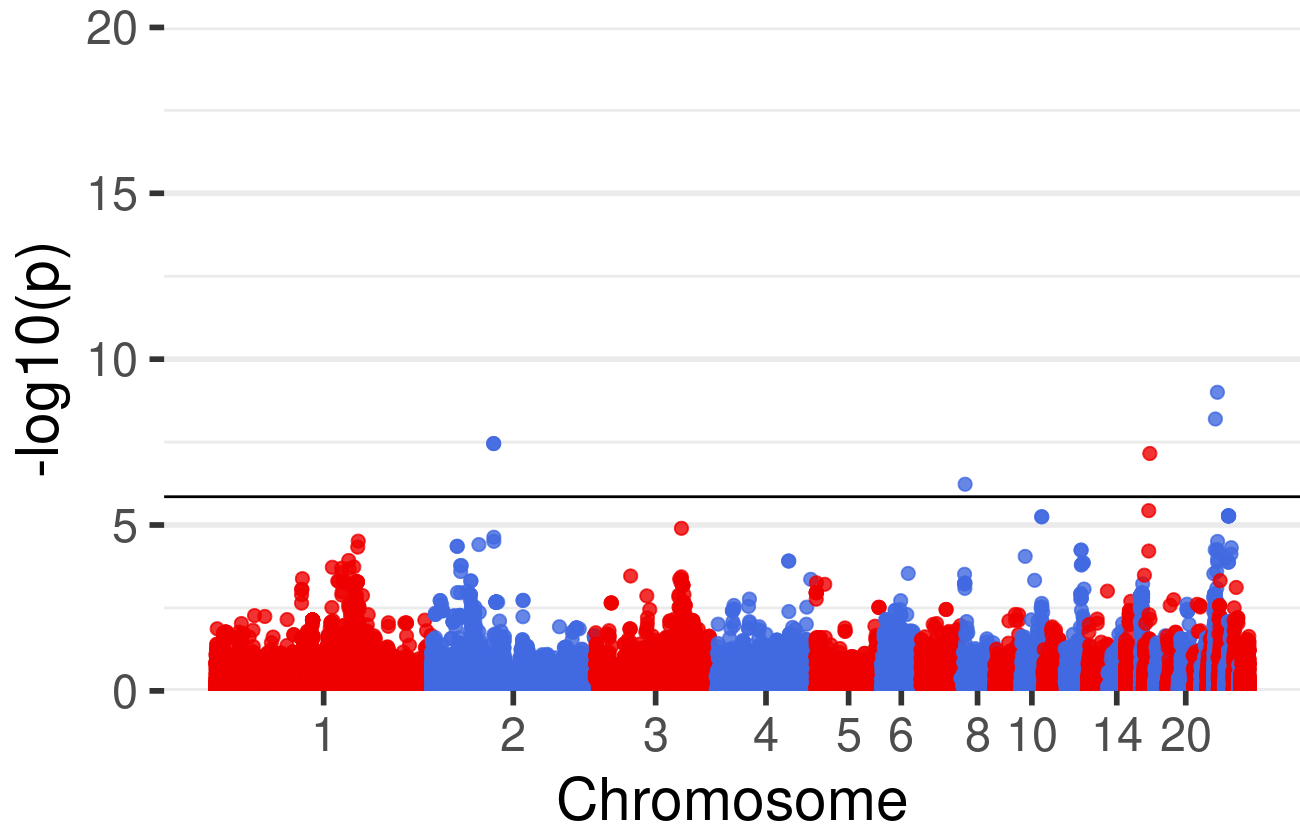



# LOC101751355

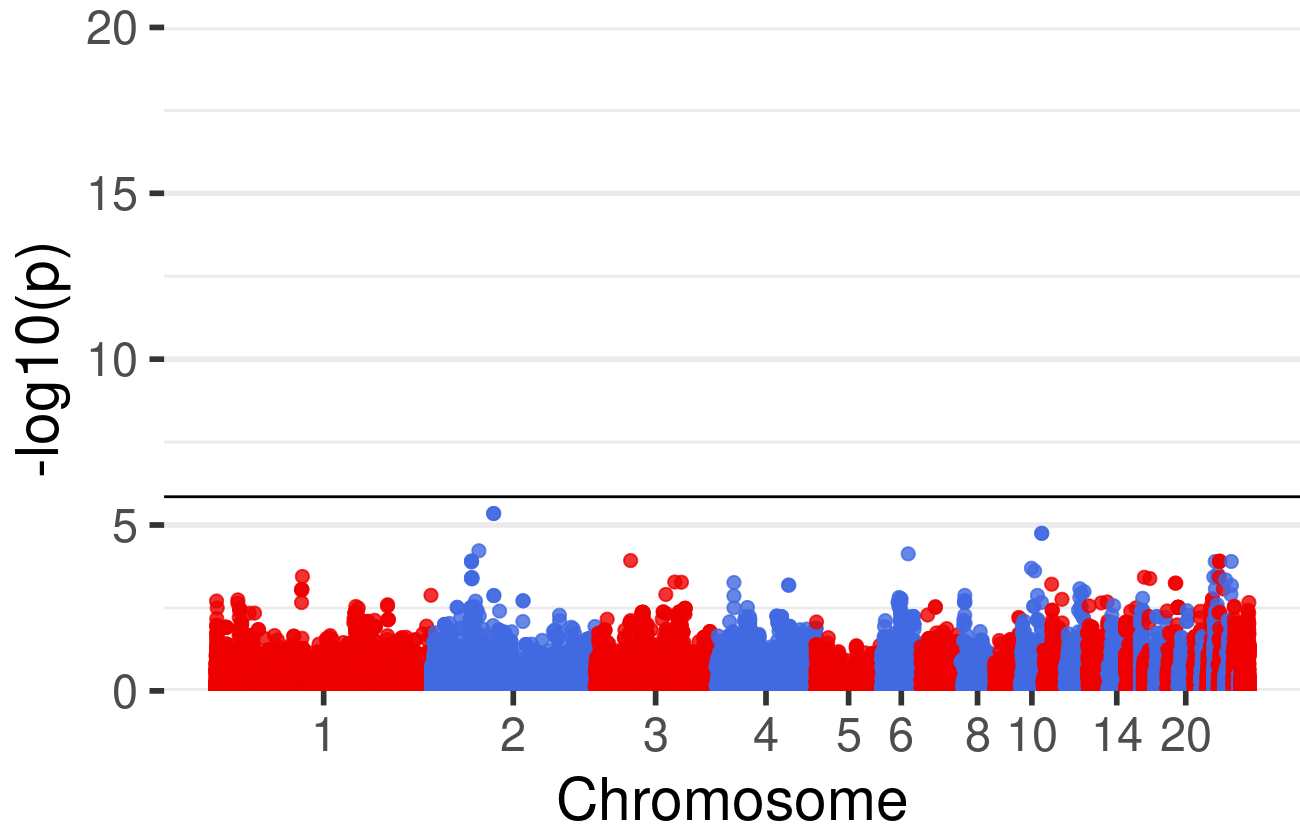

# LOC107049021

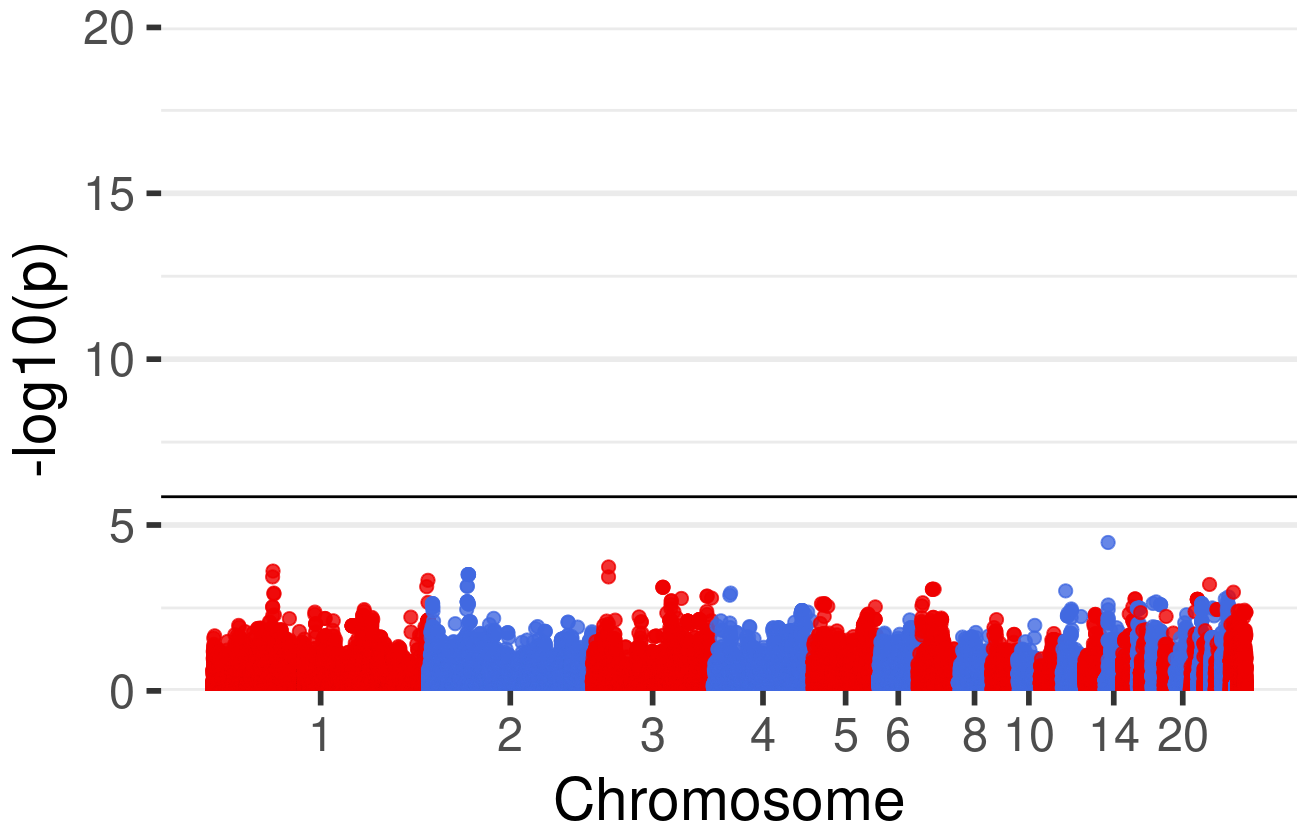

# LOC107049114

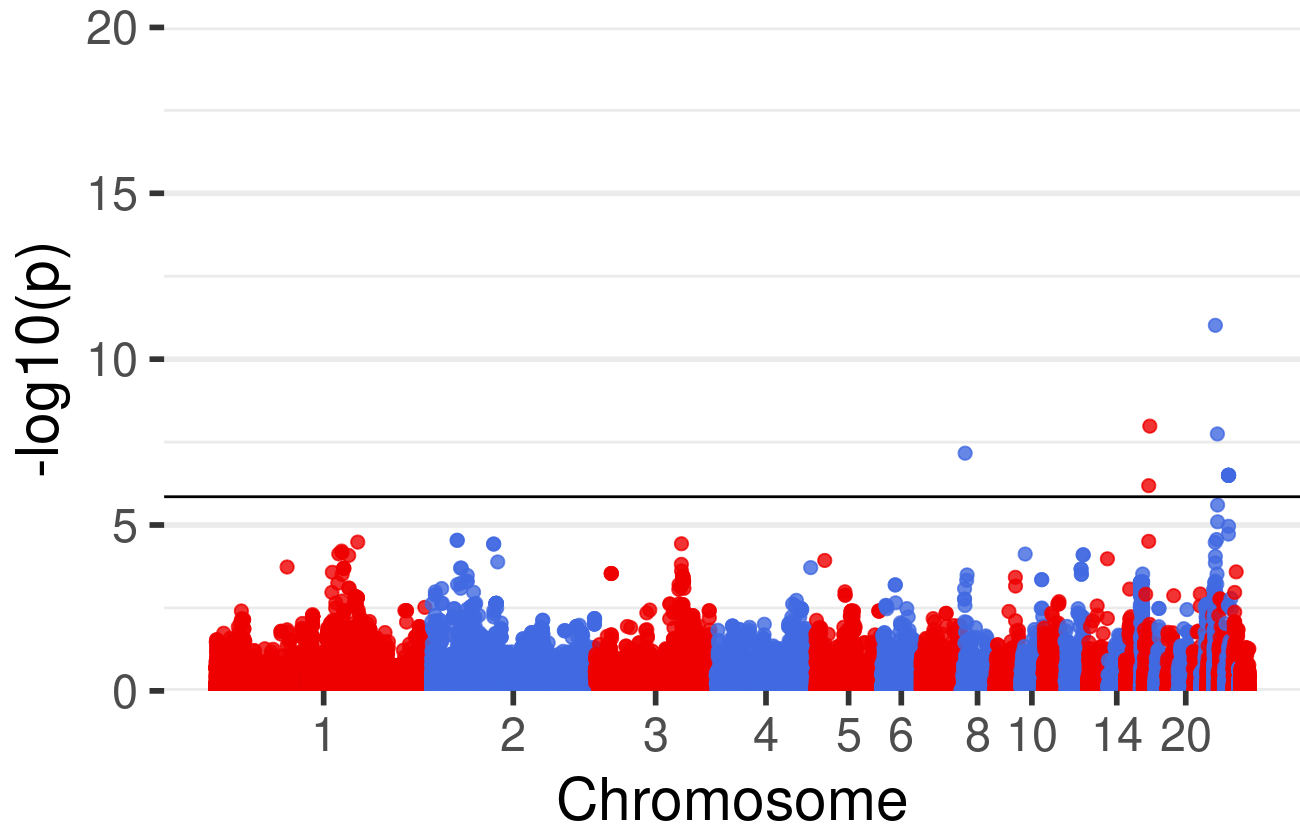

# LOC107049124

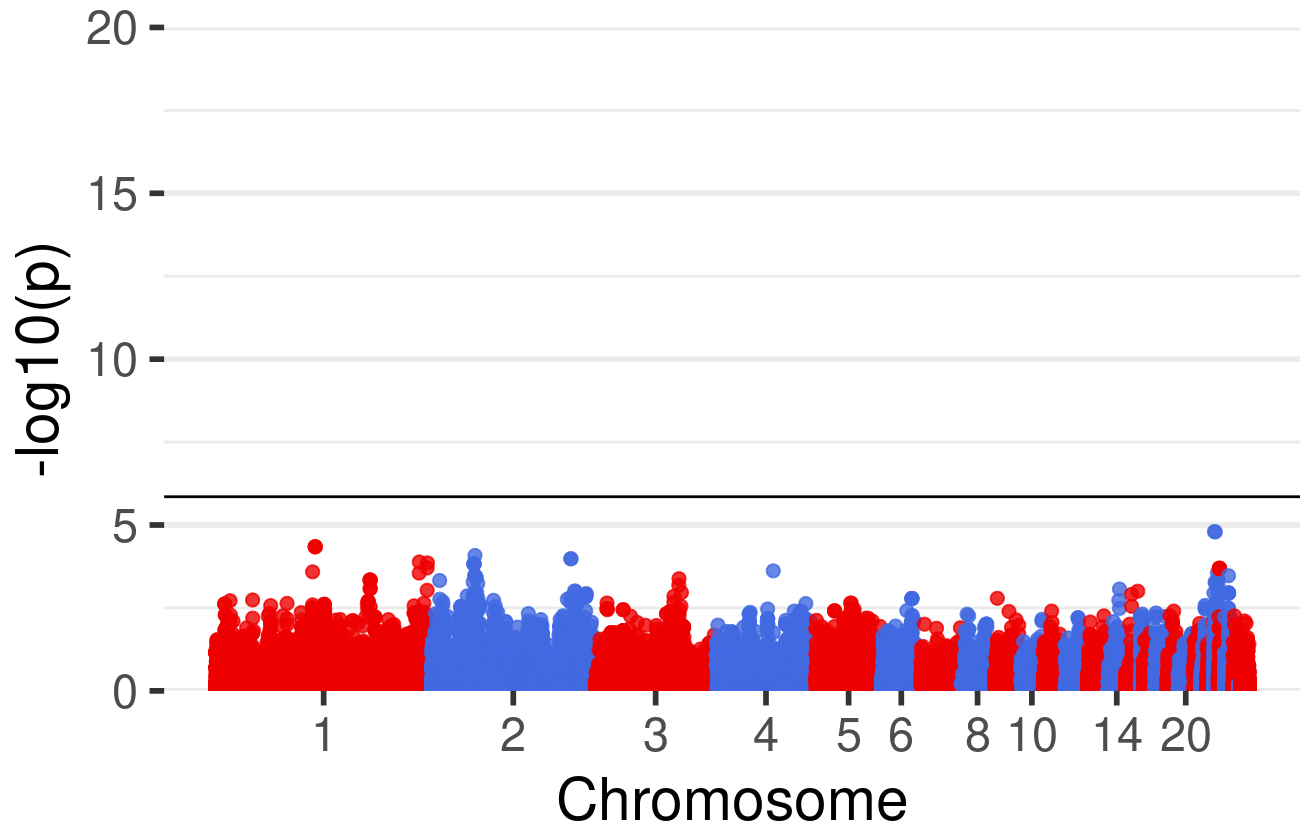

# LOC107049475

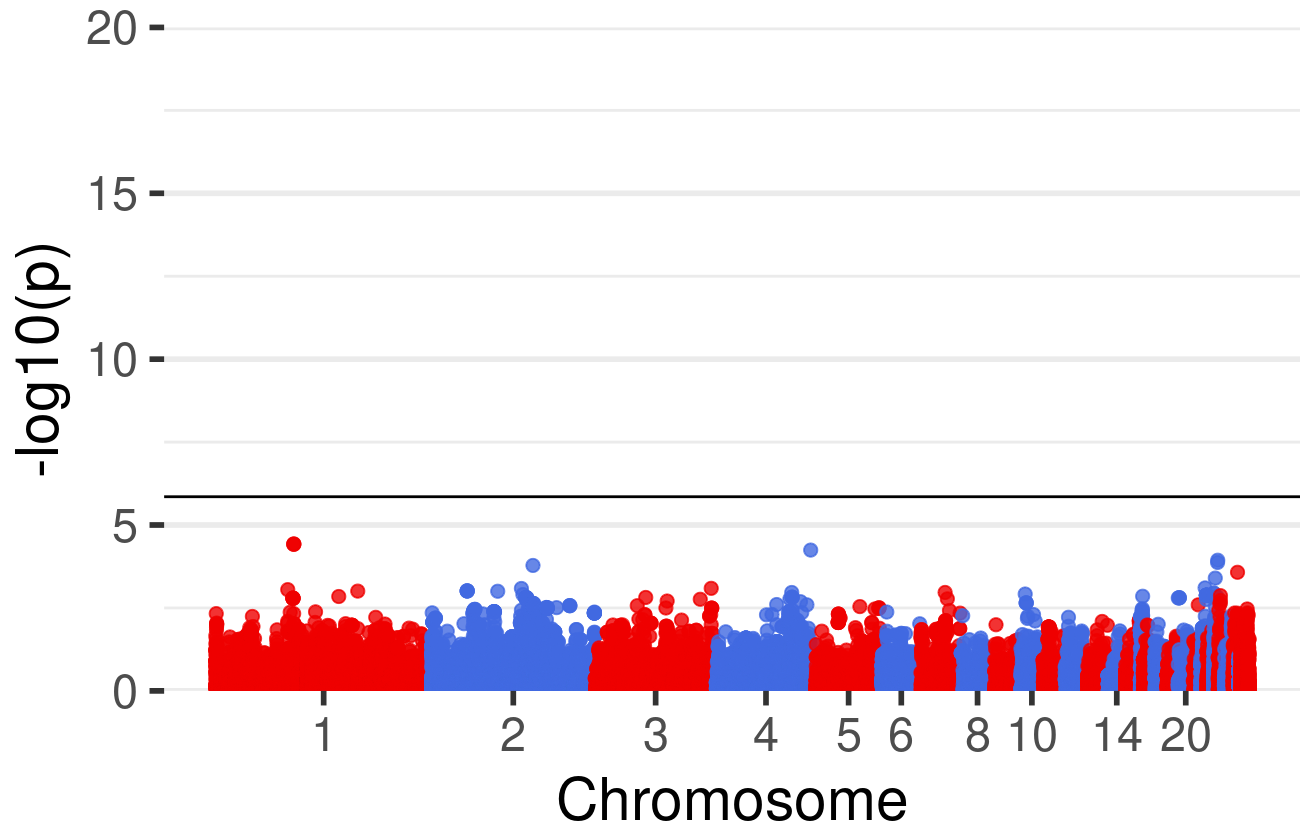

# LOC107049581

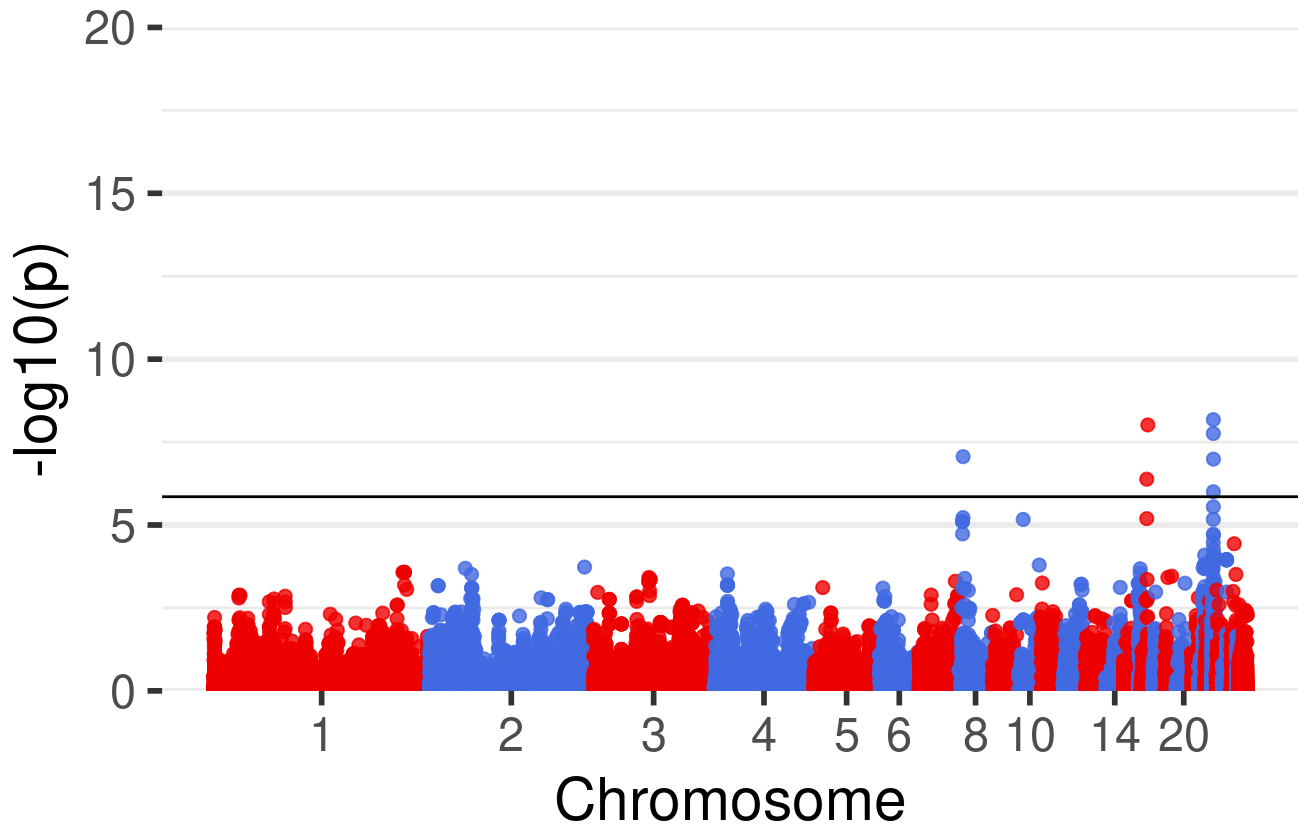

# LOC107049682

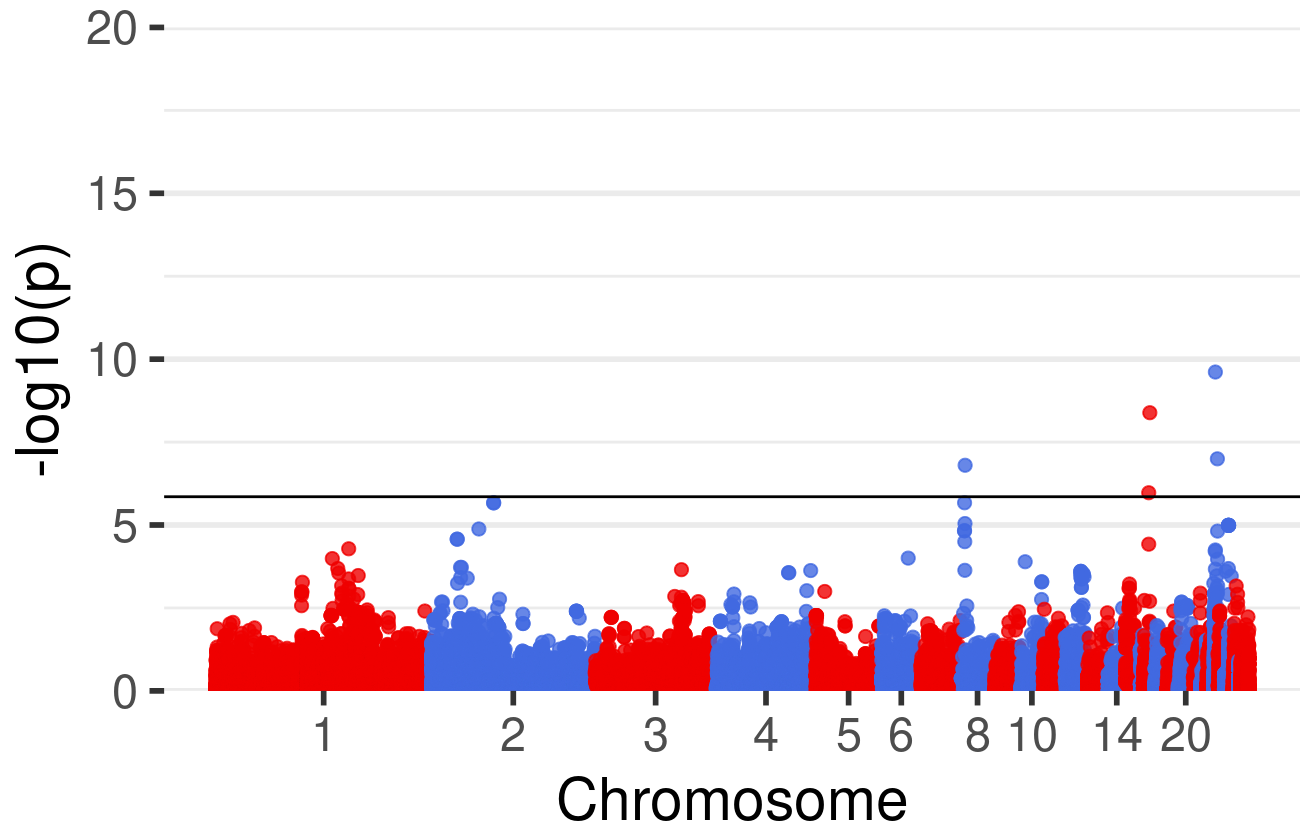

# LOC107049819

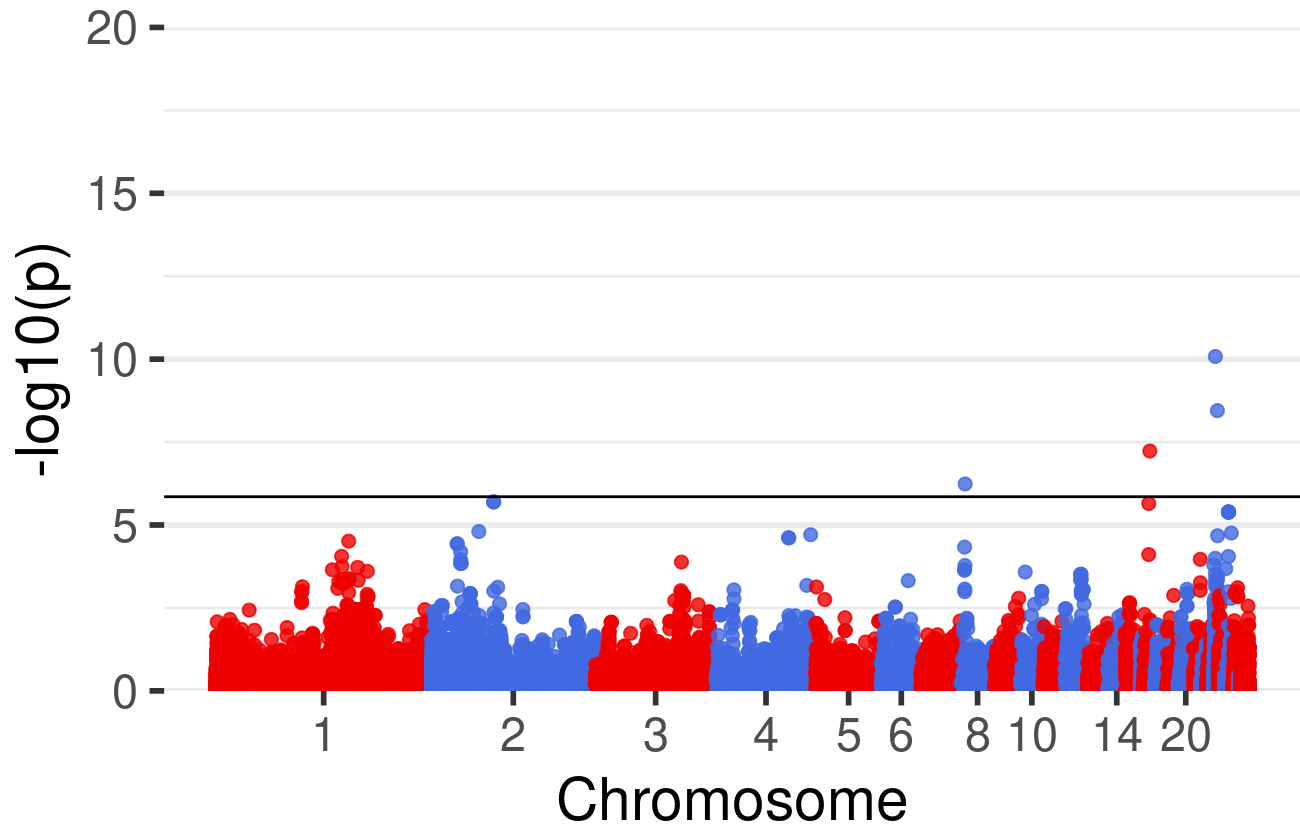



# LOC107049847

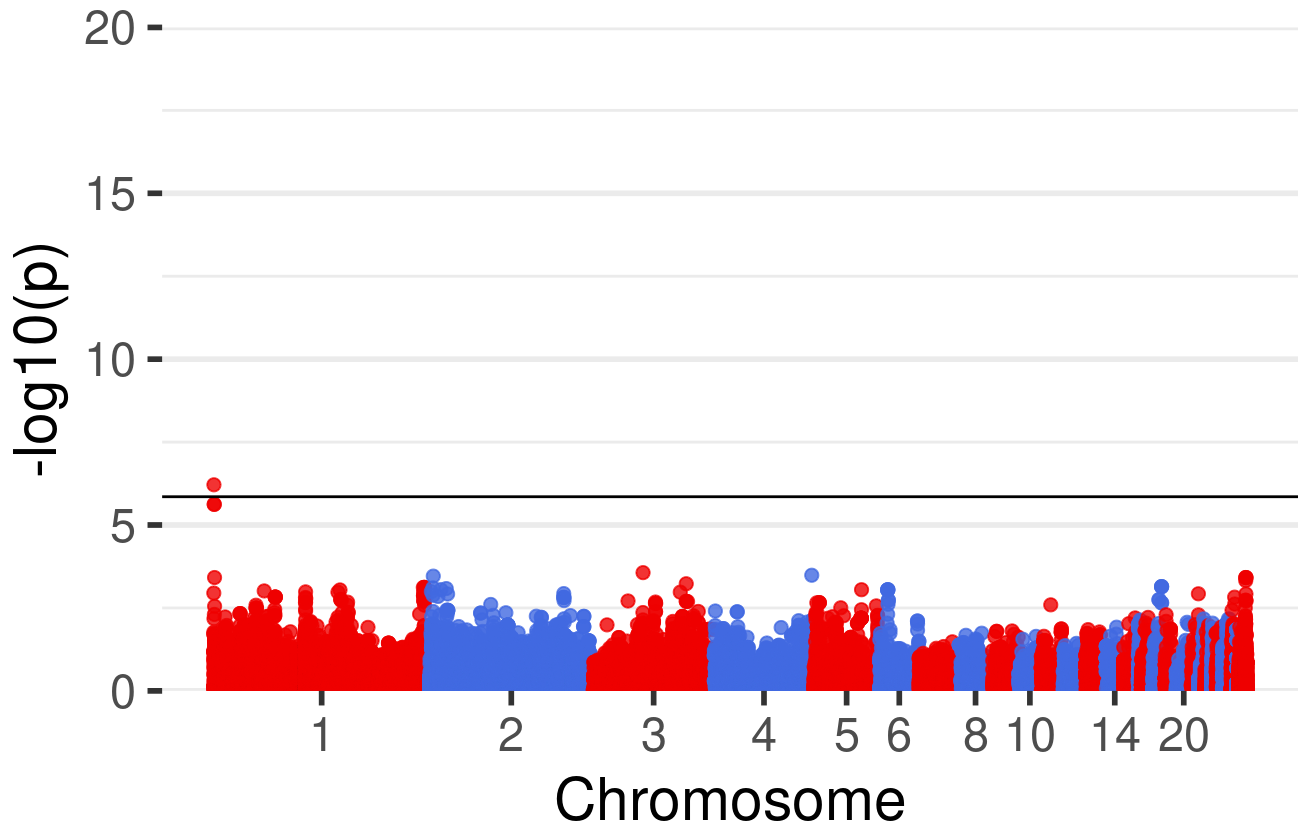

# LOC107050473

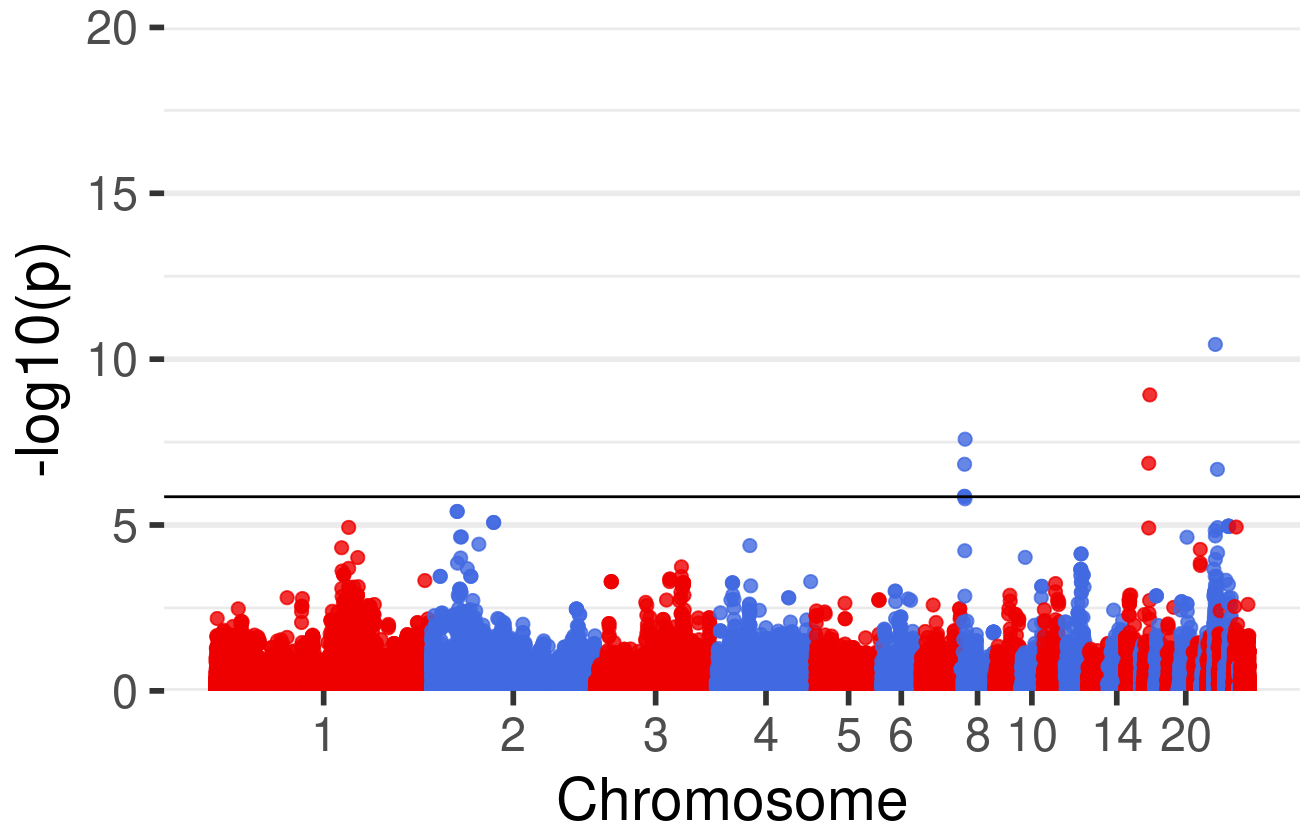

# LOC107052027

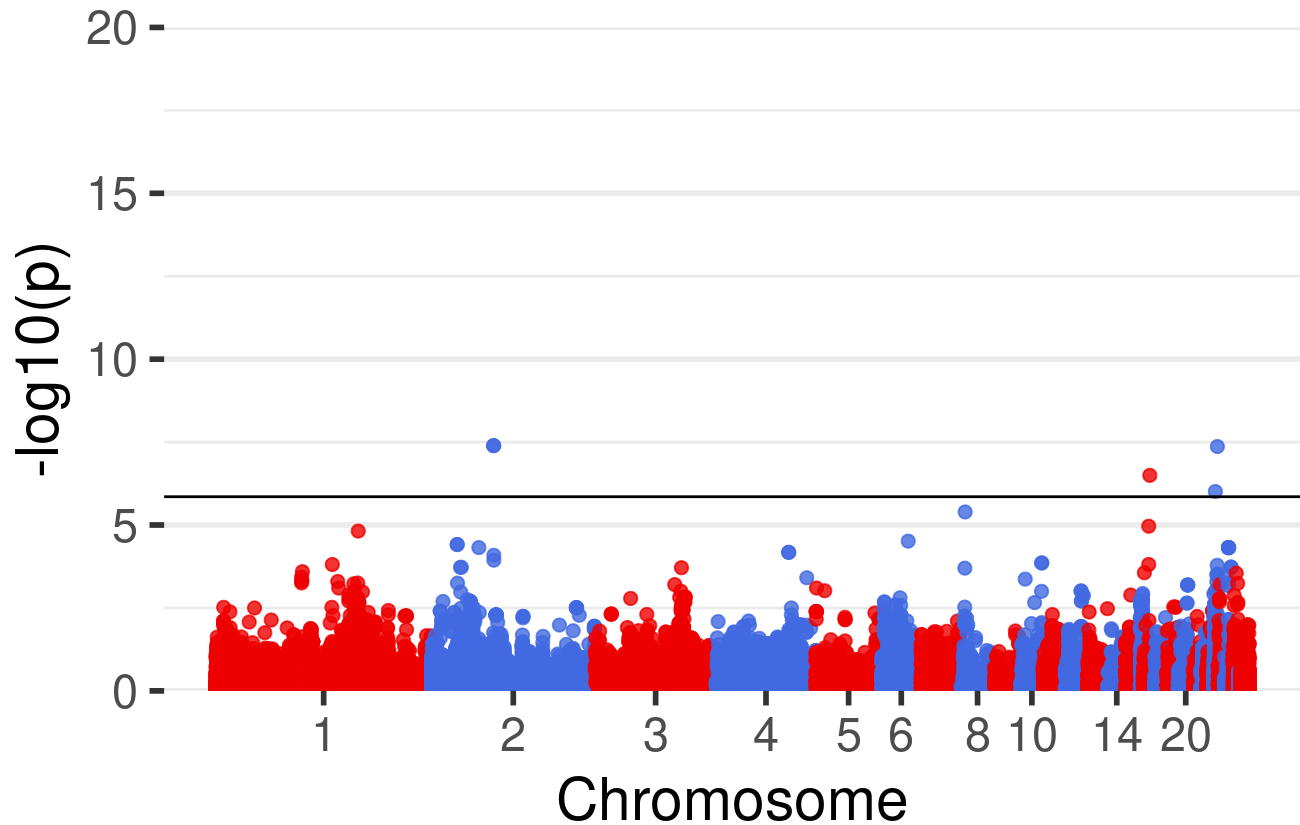

# LOC107052360

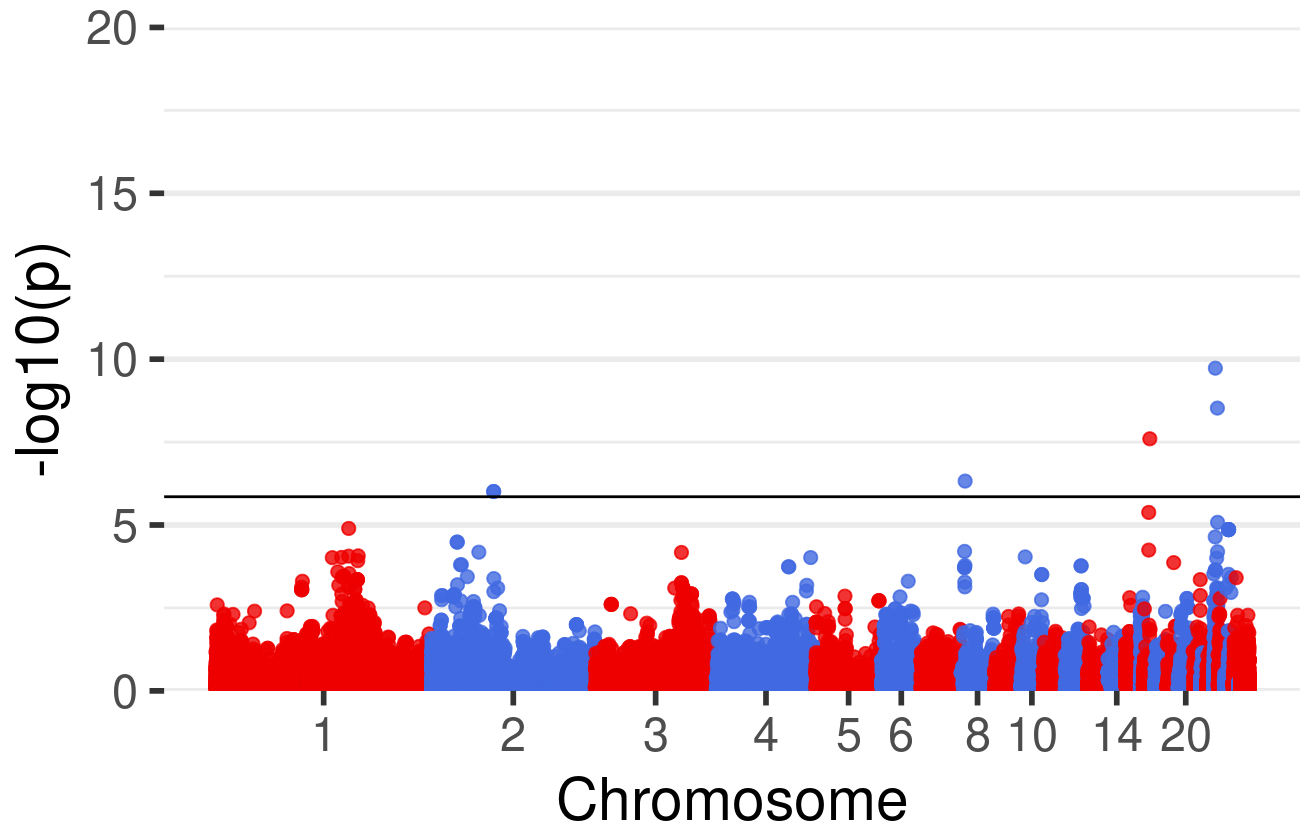

# LOC107052506

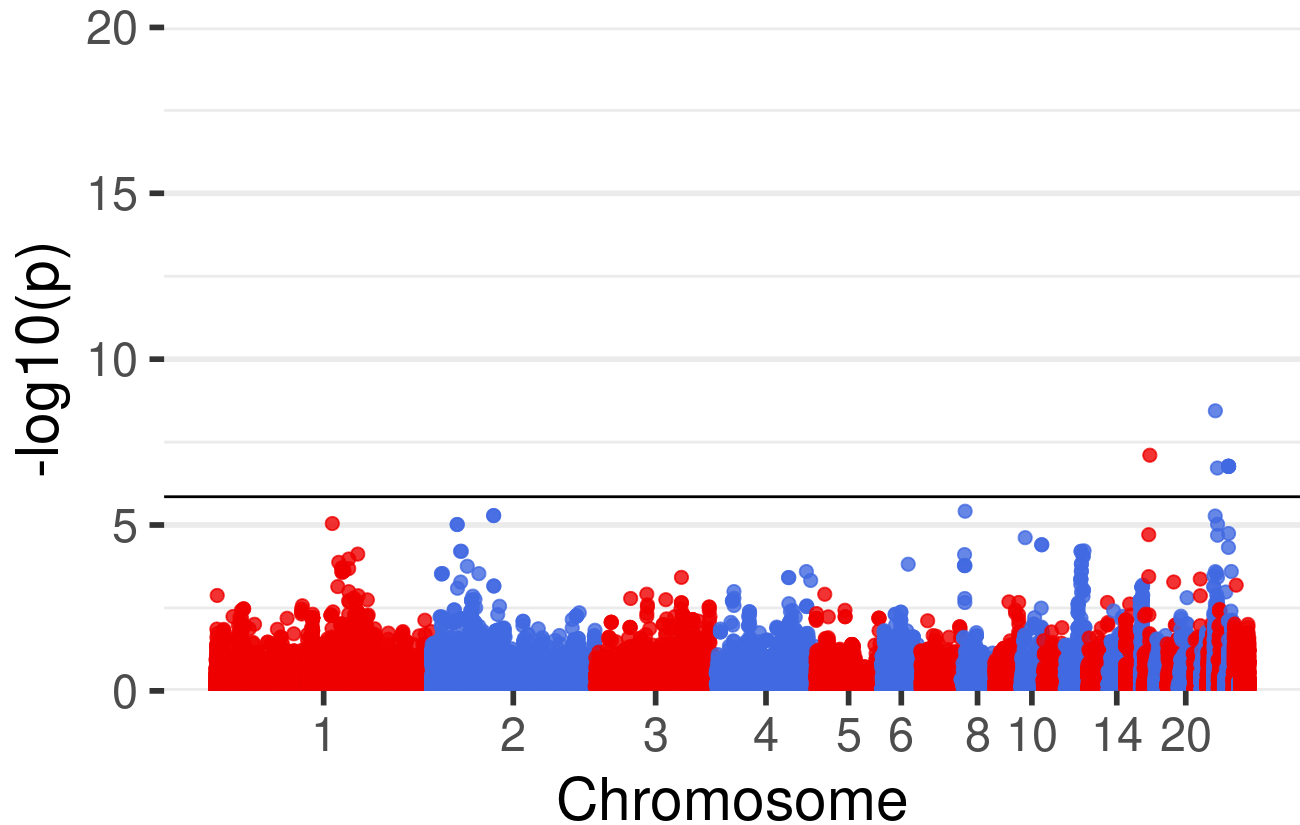



# LOC107053901

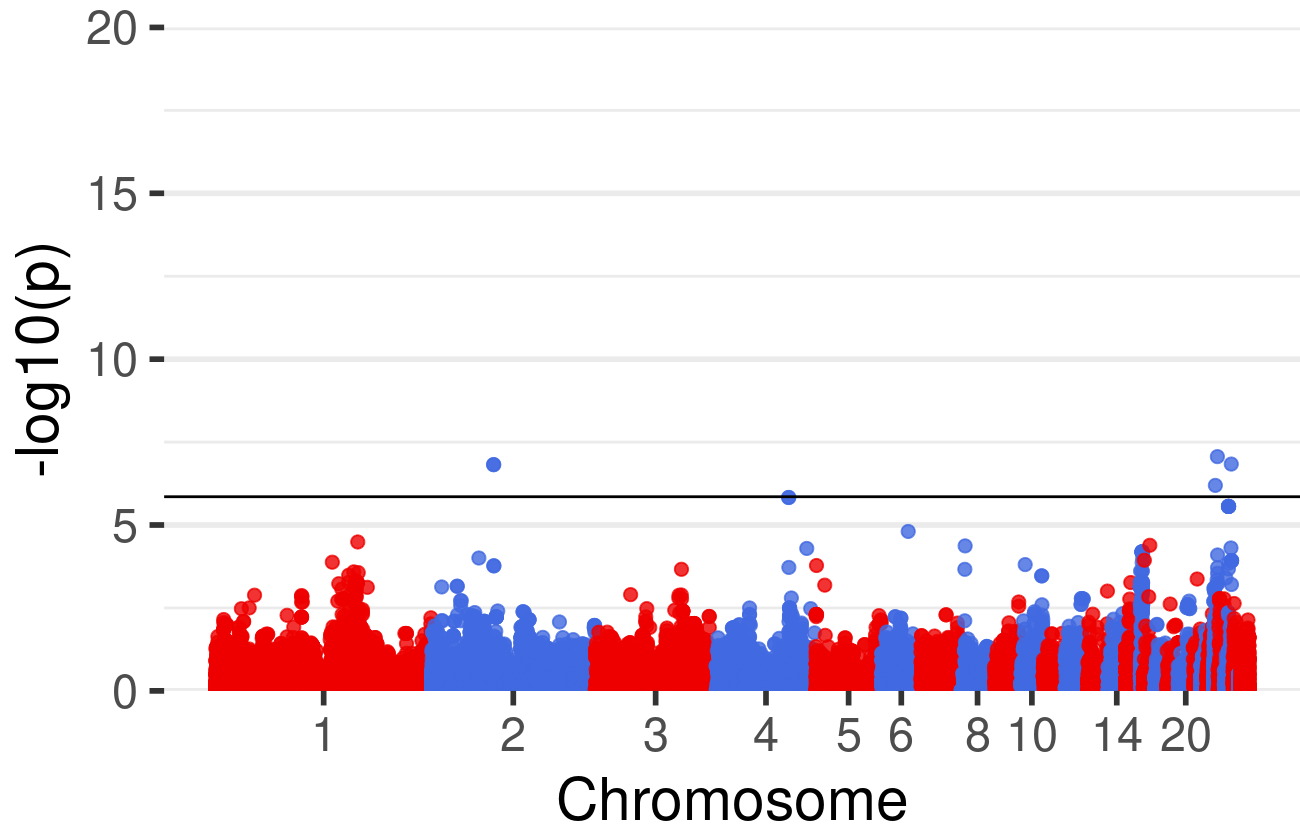

# LOC107054253

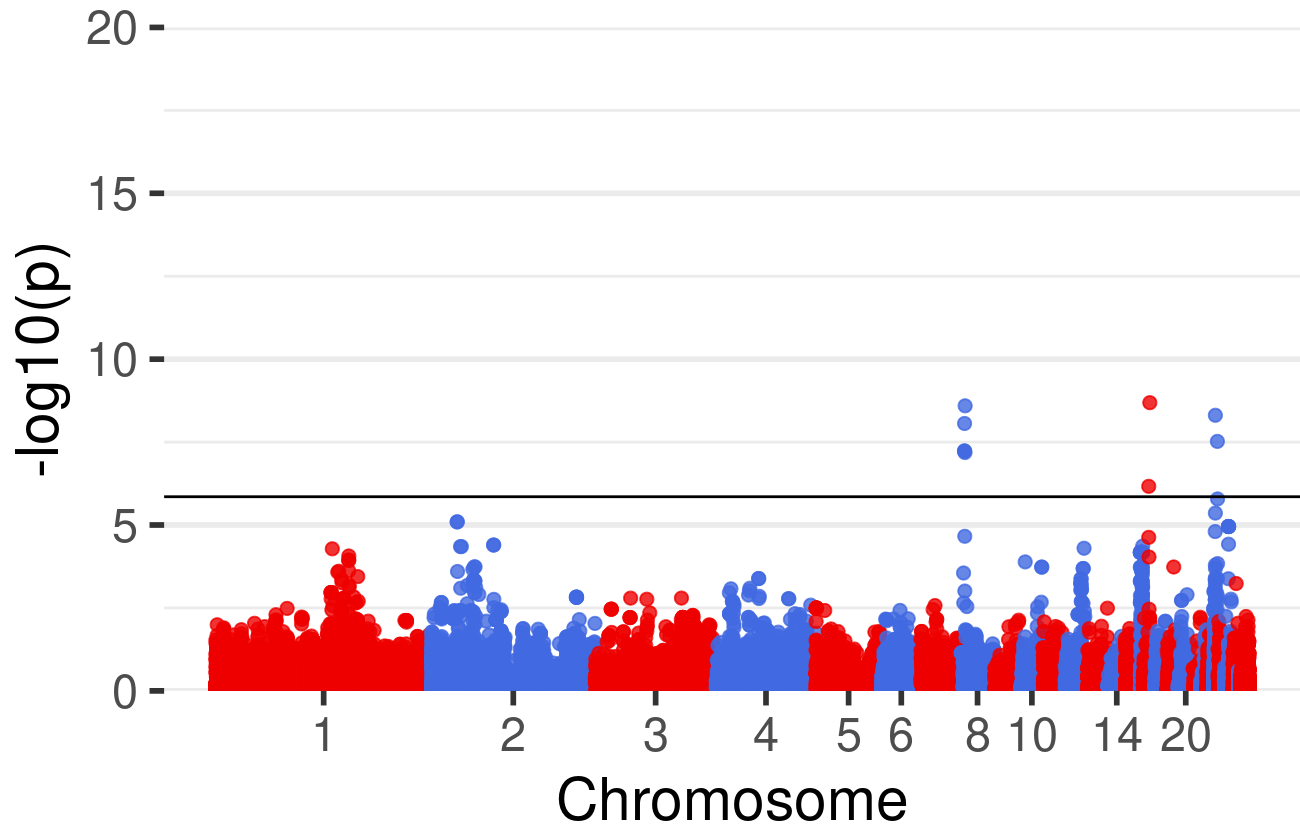



# LOC107054696

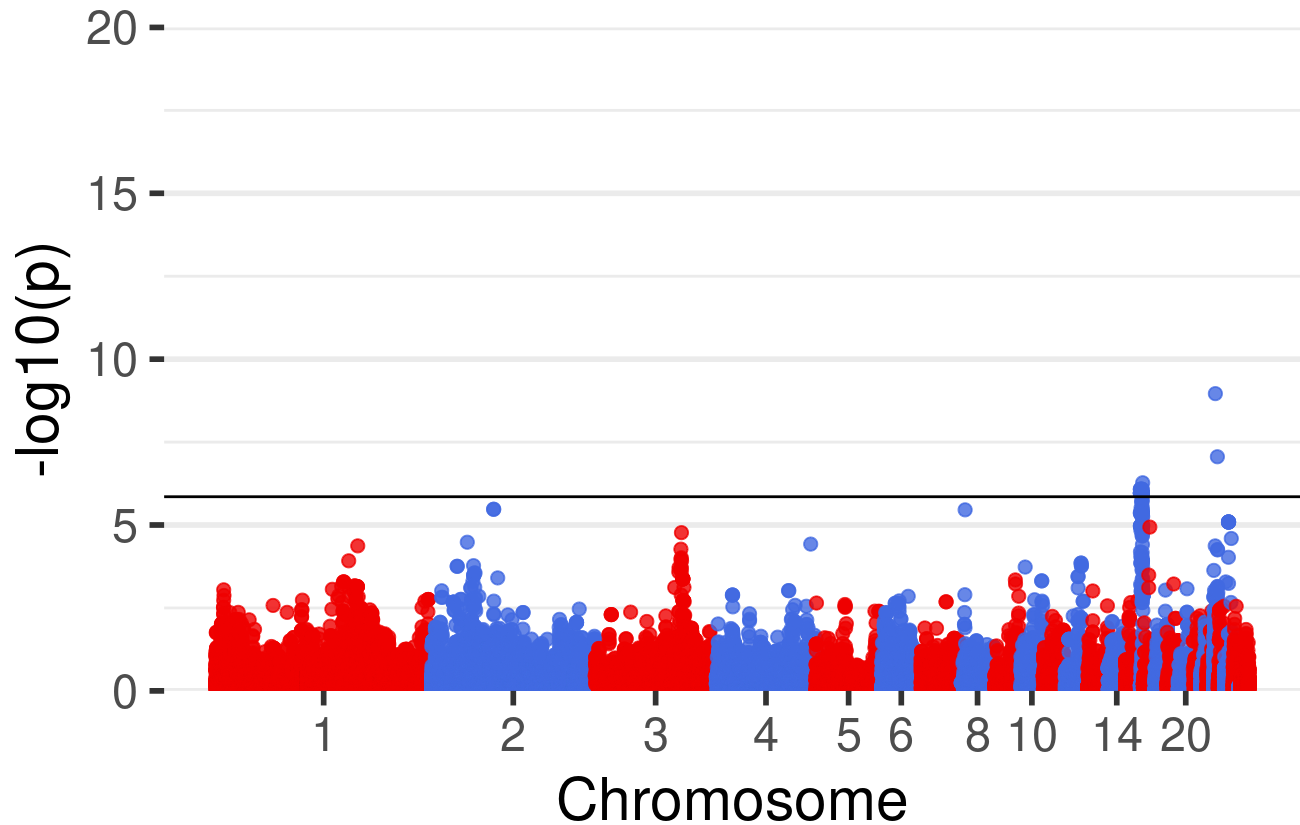

# LOC107054697

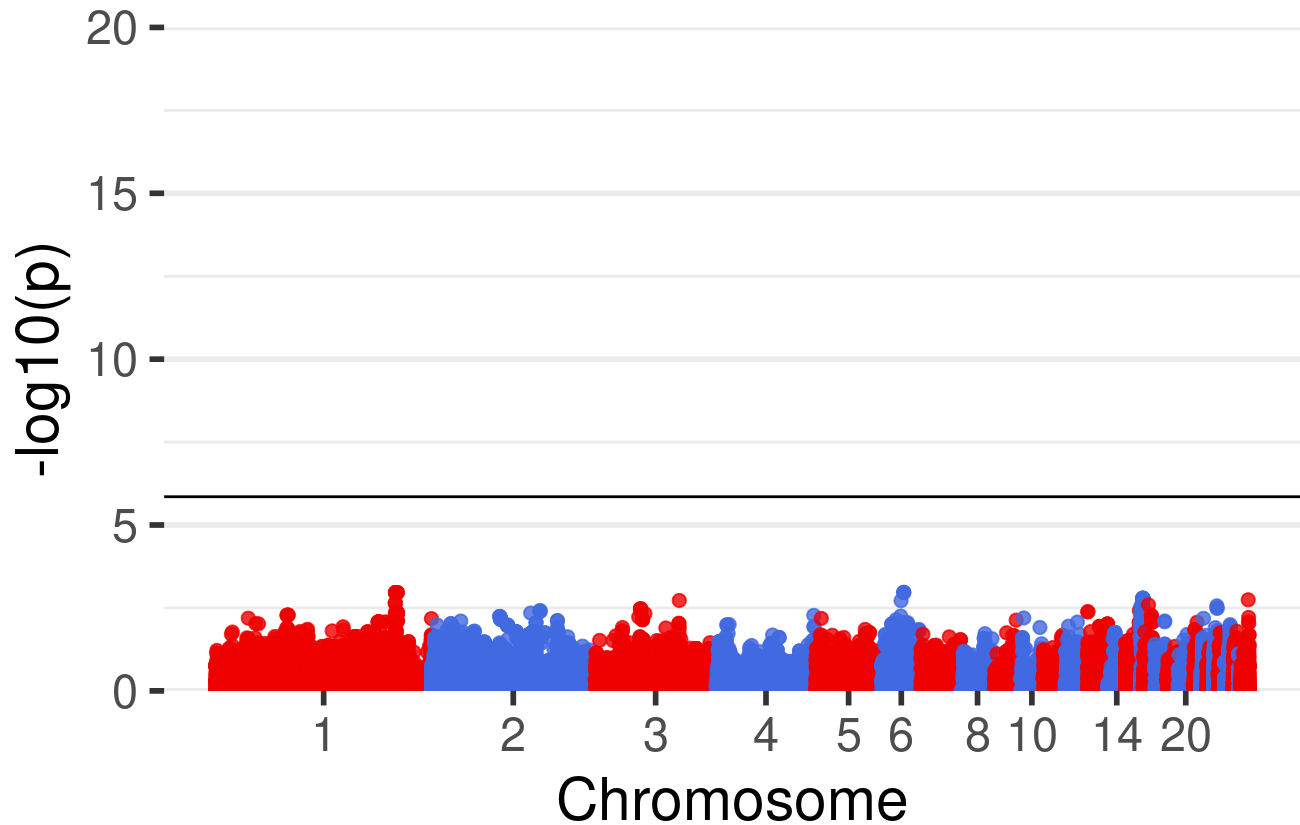

# LOC112529962

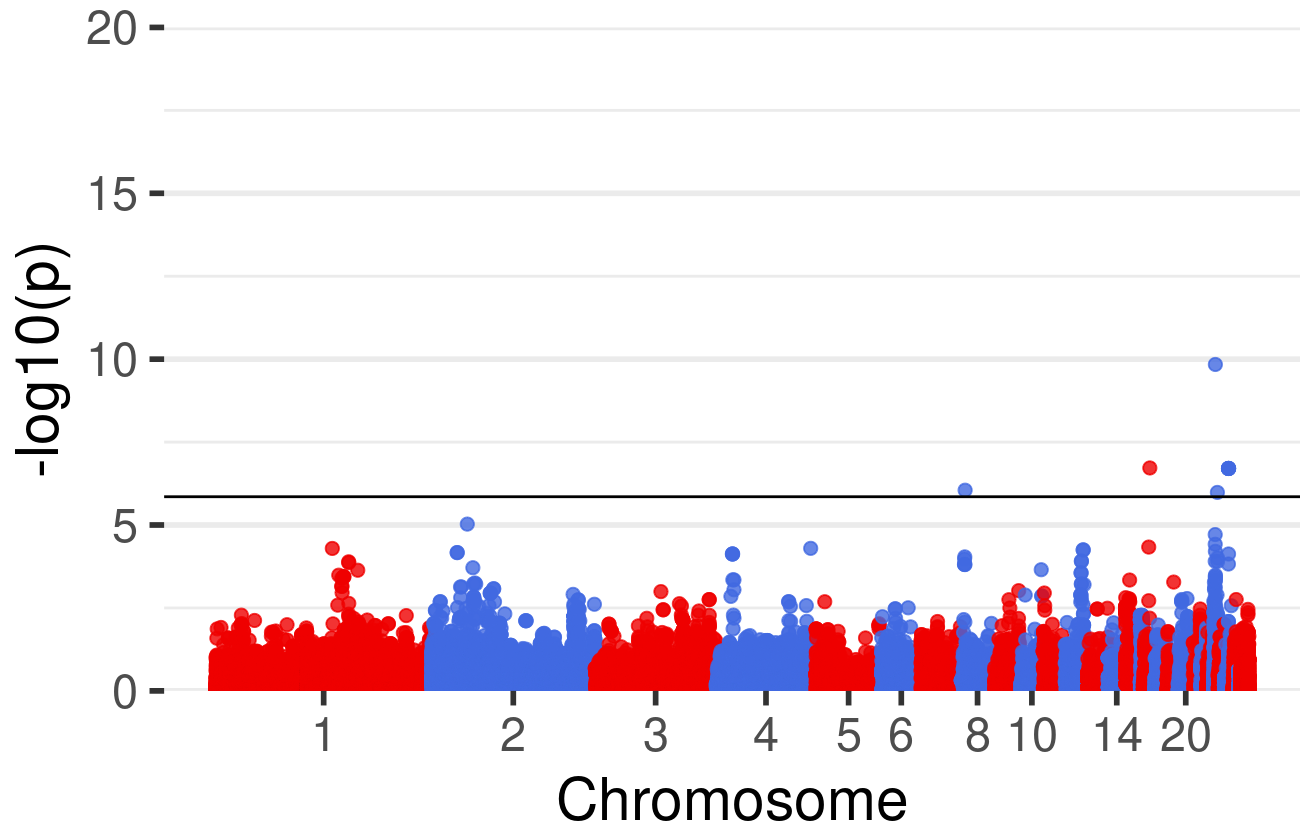

# LOC112530181

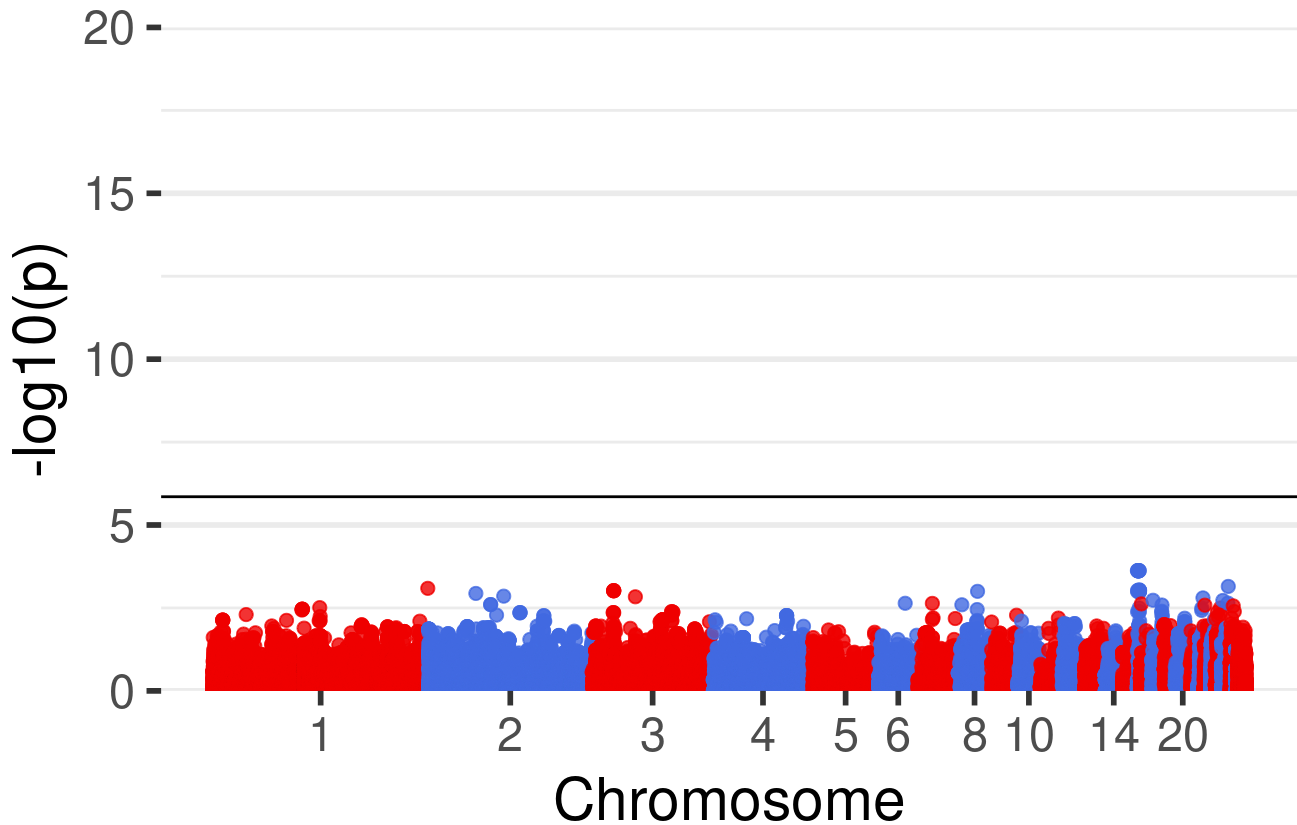

# LOC112530399

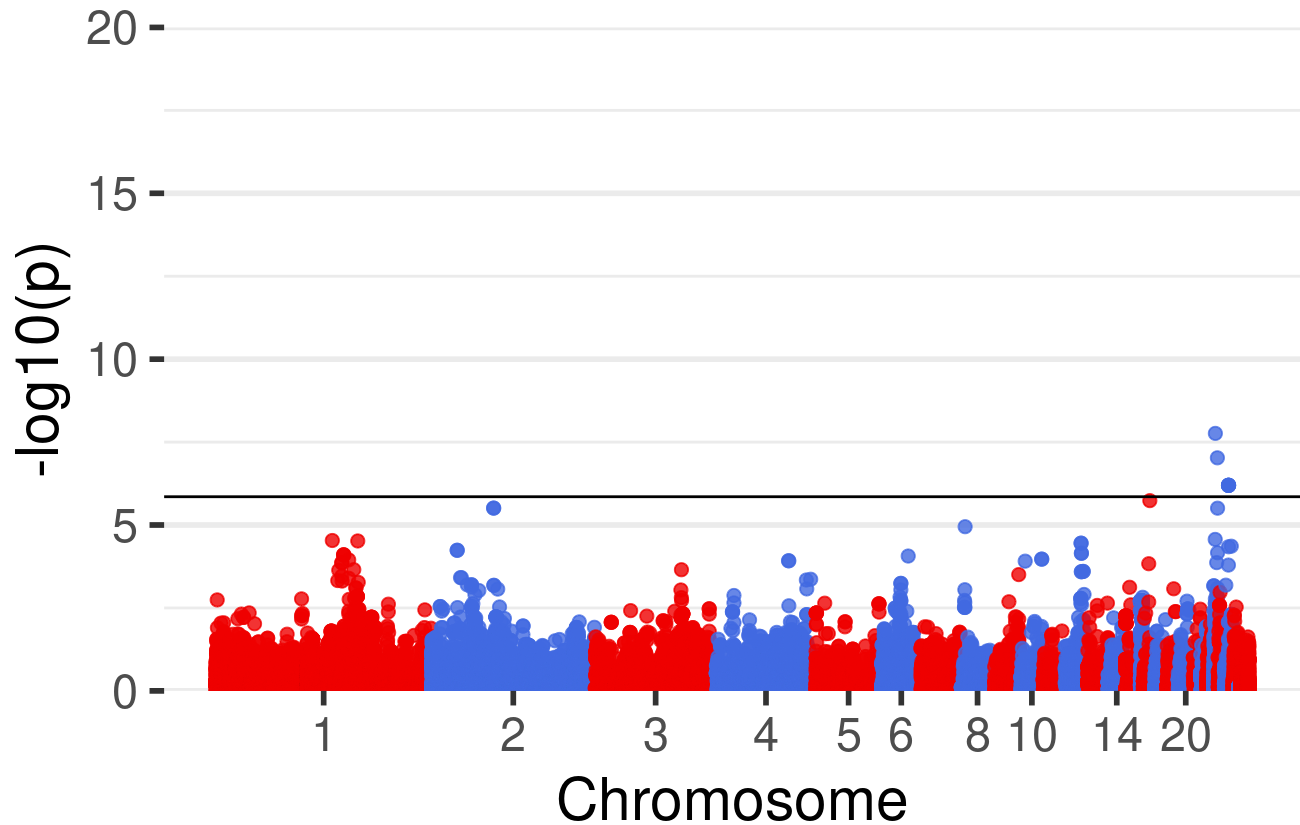

# LOC112530433

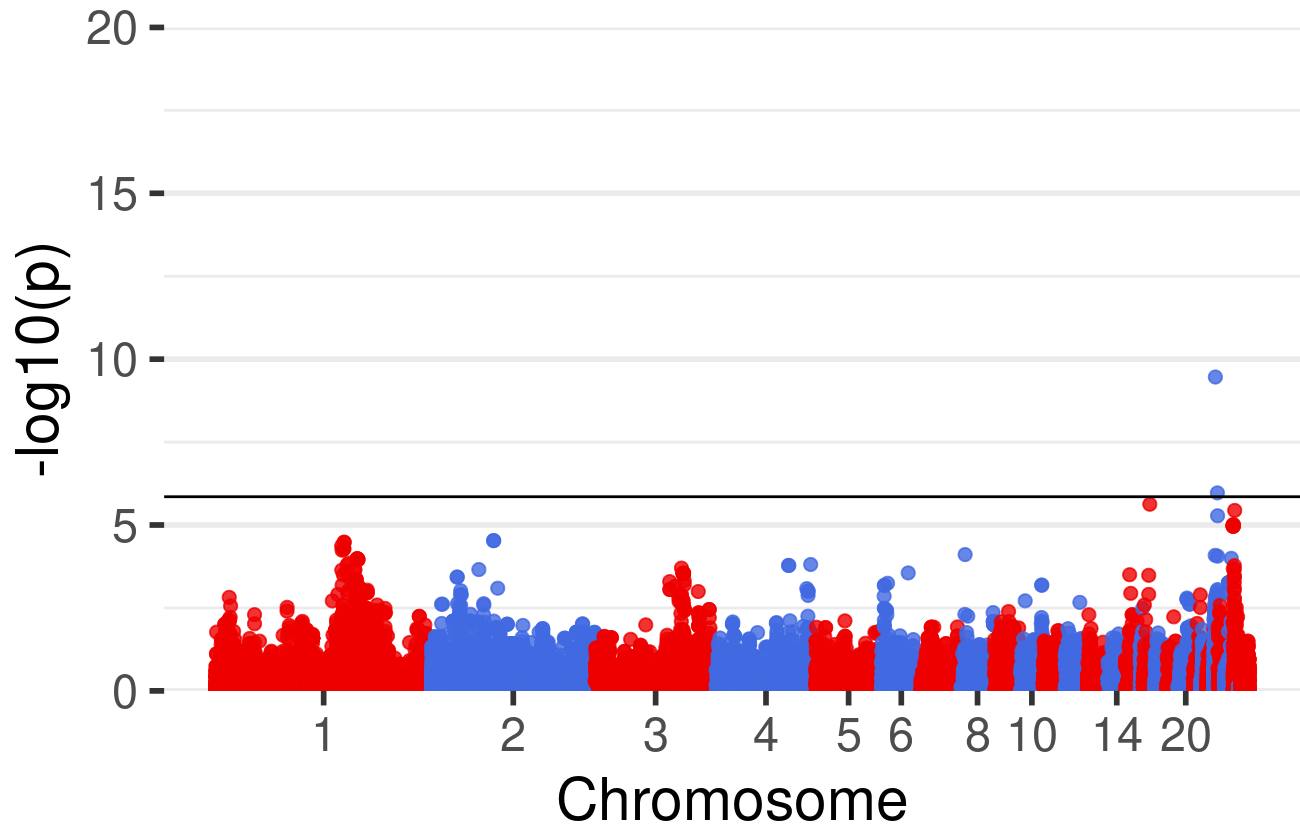

# LOC112531100

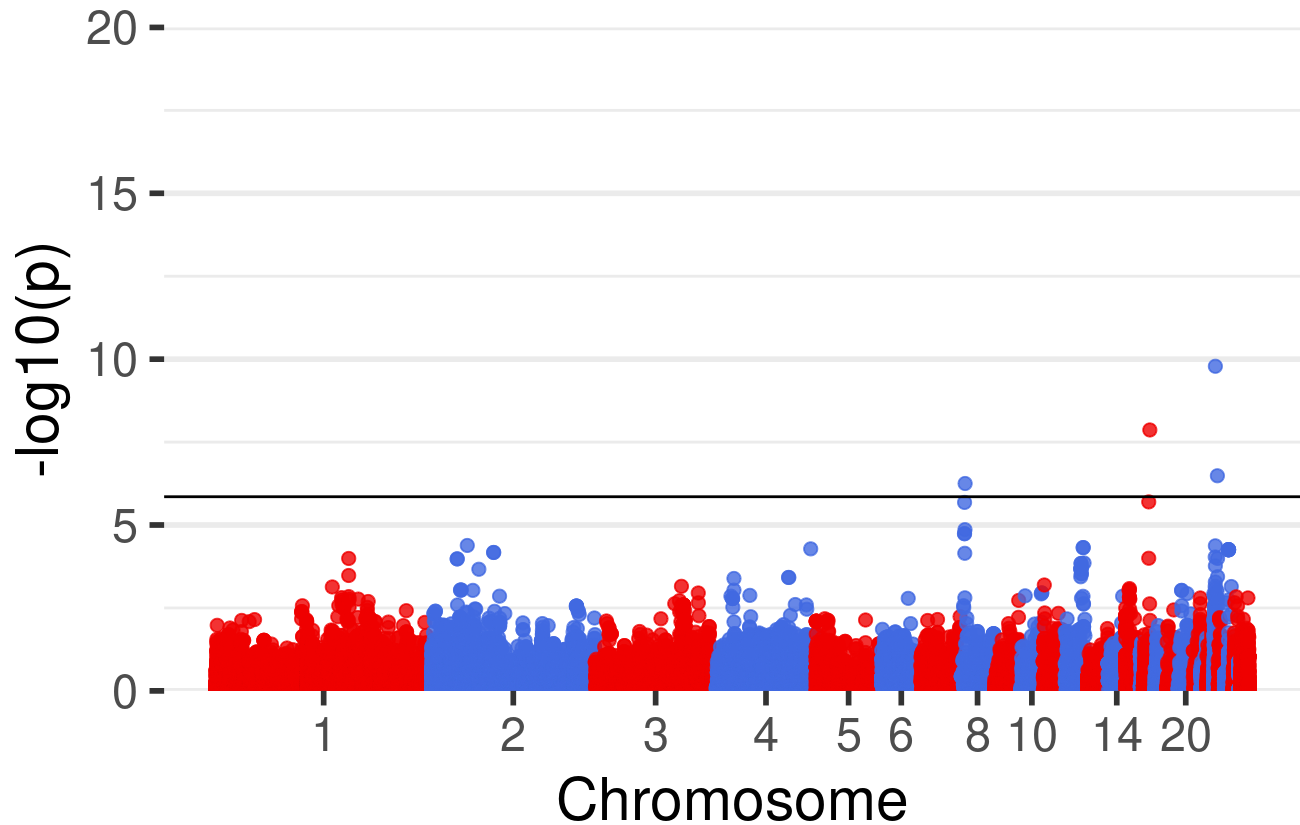

# LOC112531229

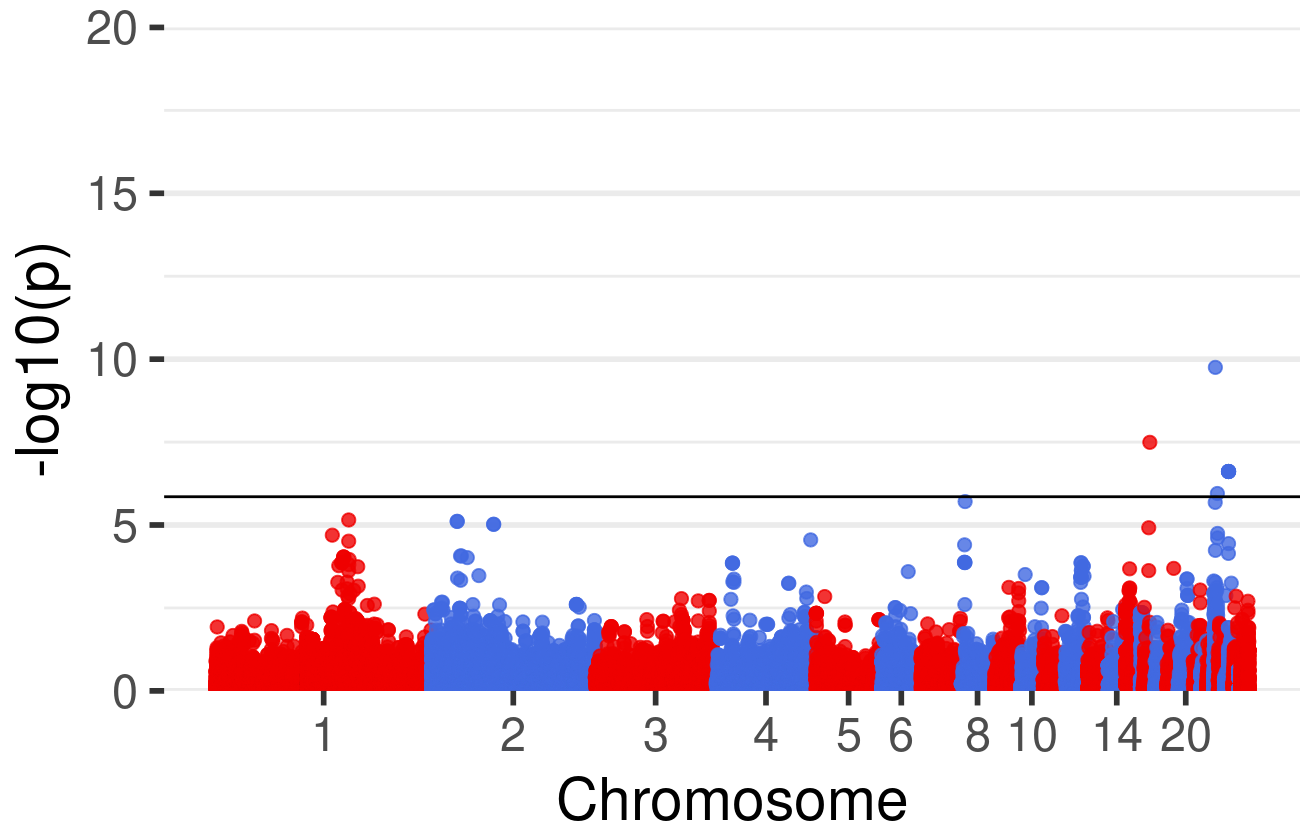



# LOC112531493

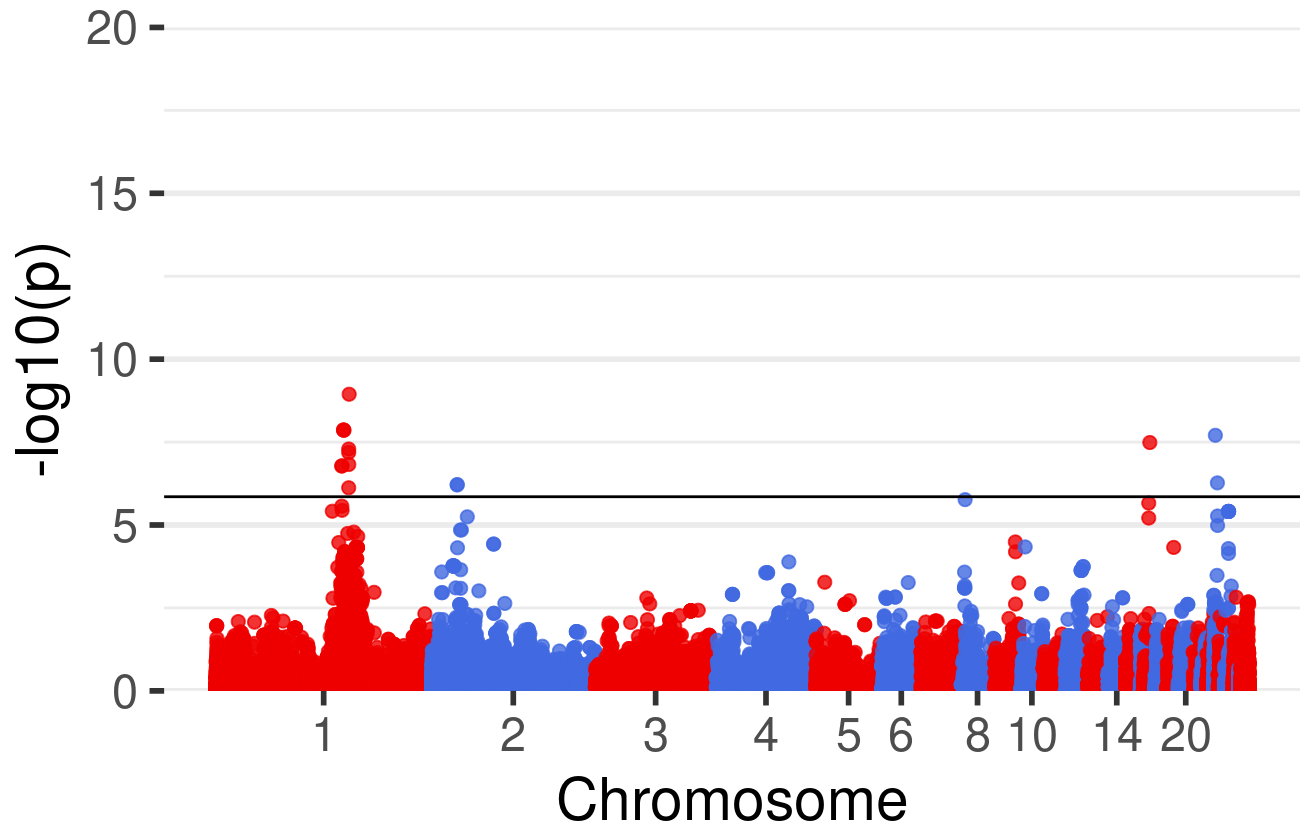

# LOC112531599

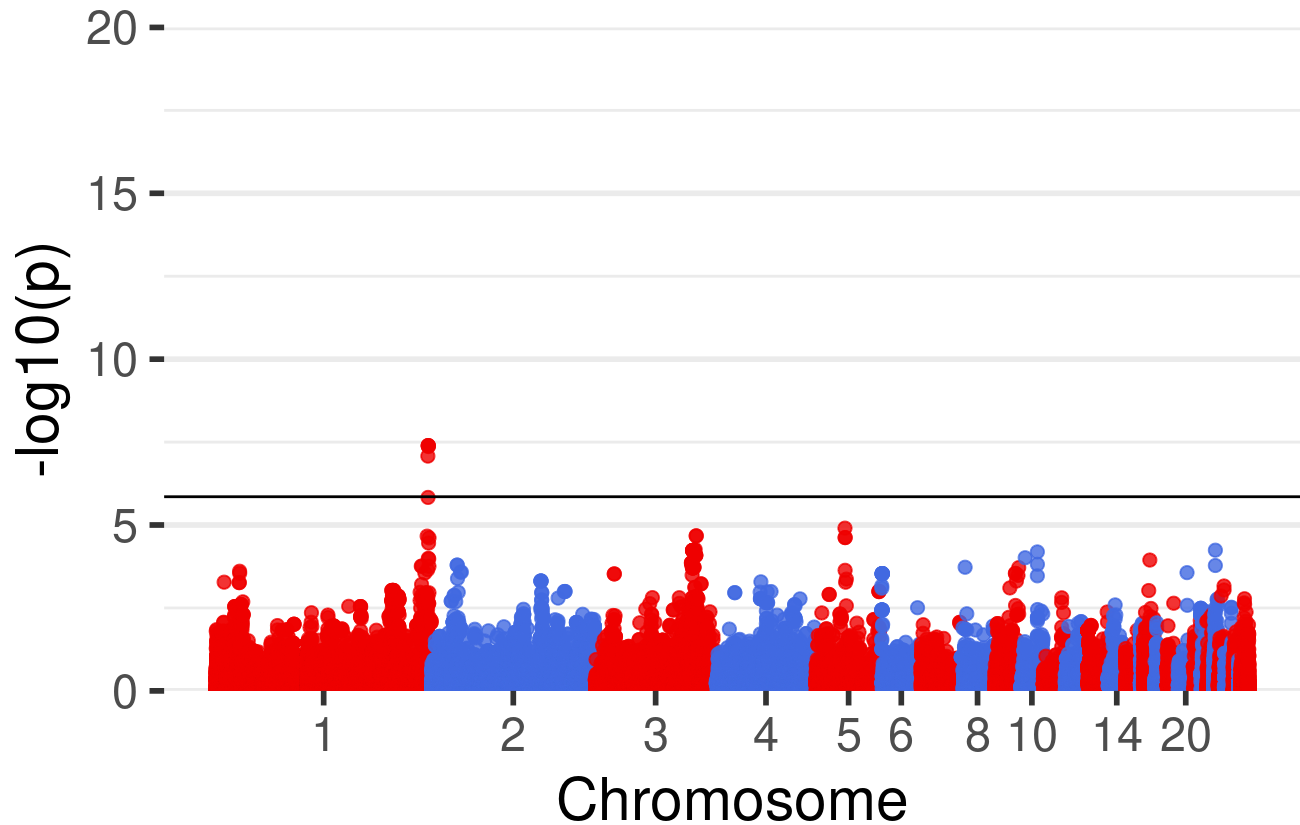

# LOC112531601

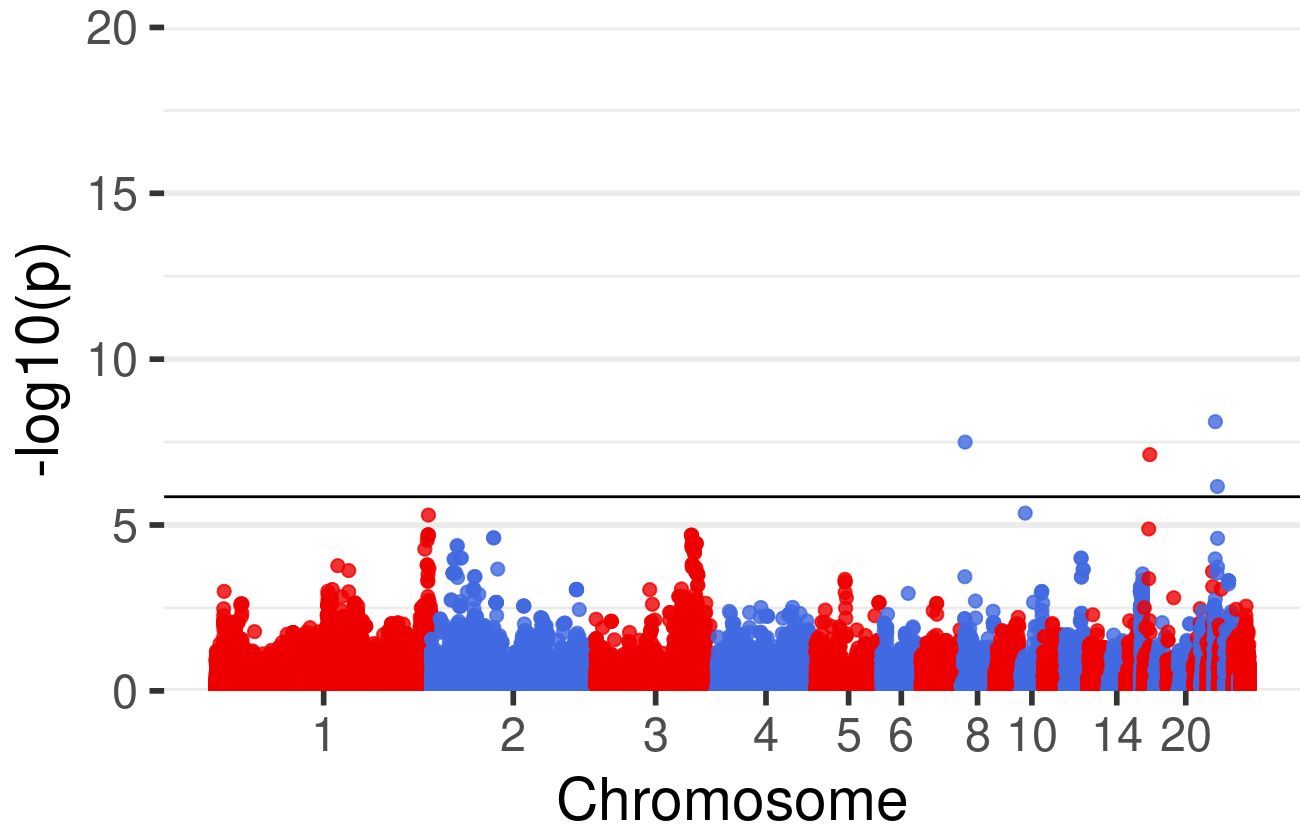

# LOC112531602

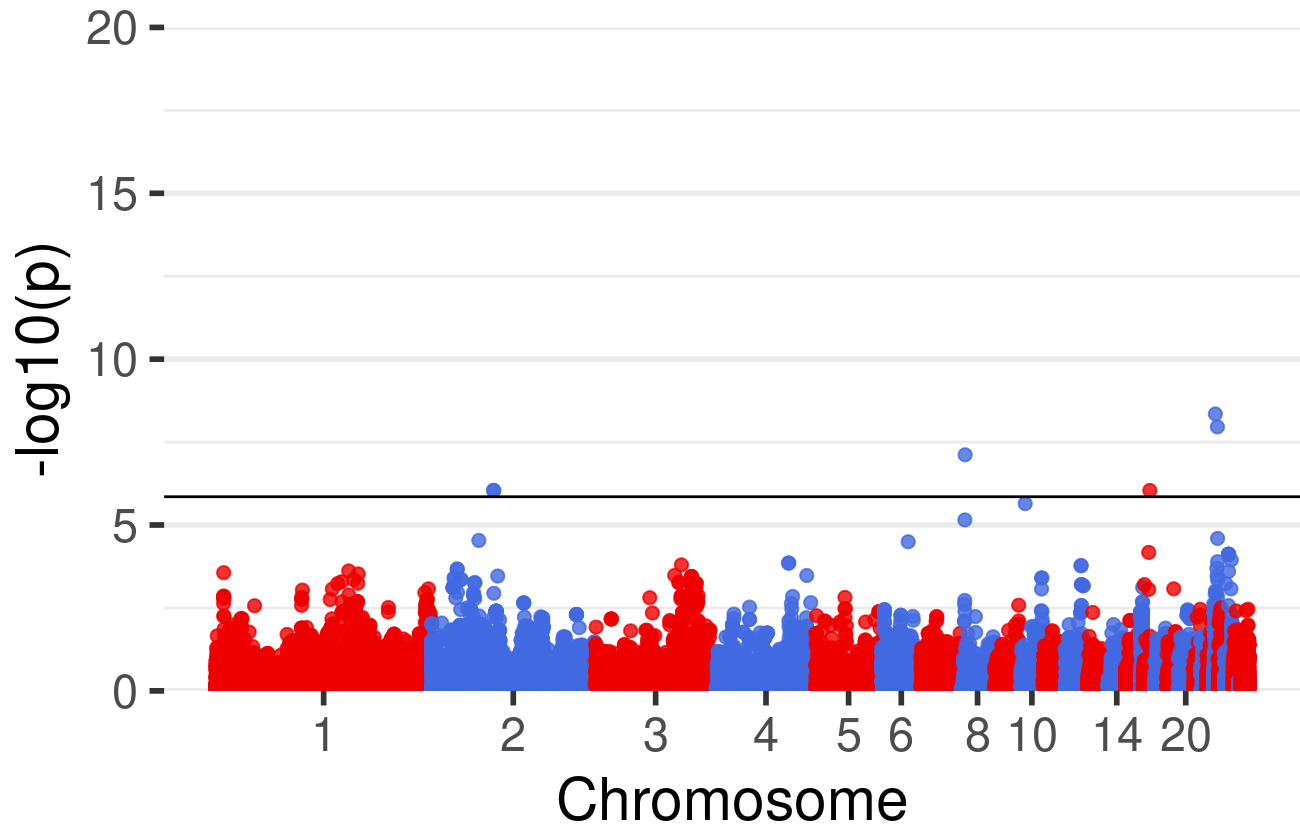

# LOC112531740

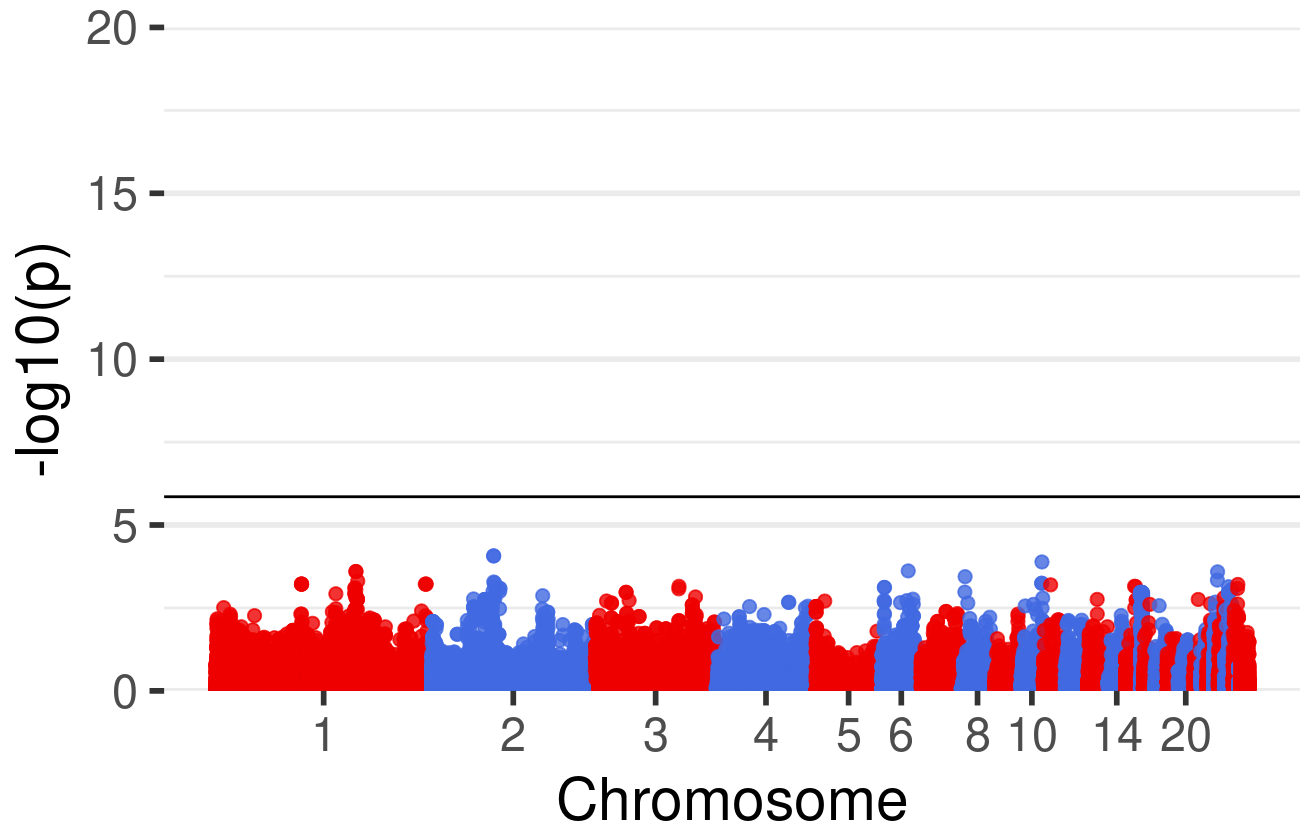

# LOC112531741

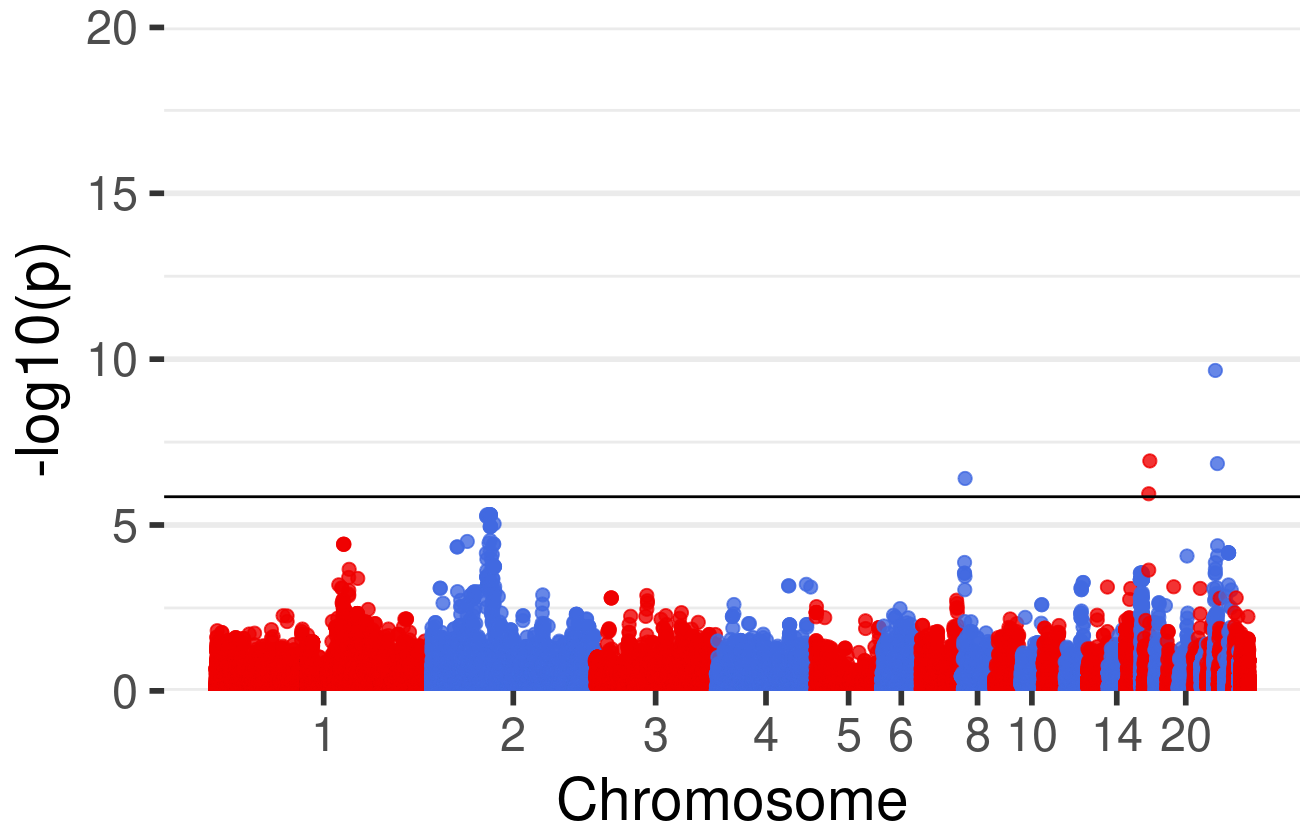

# LOC112531745

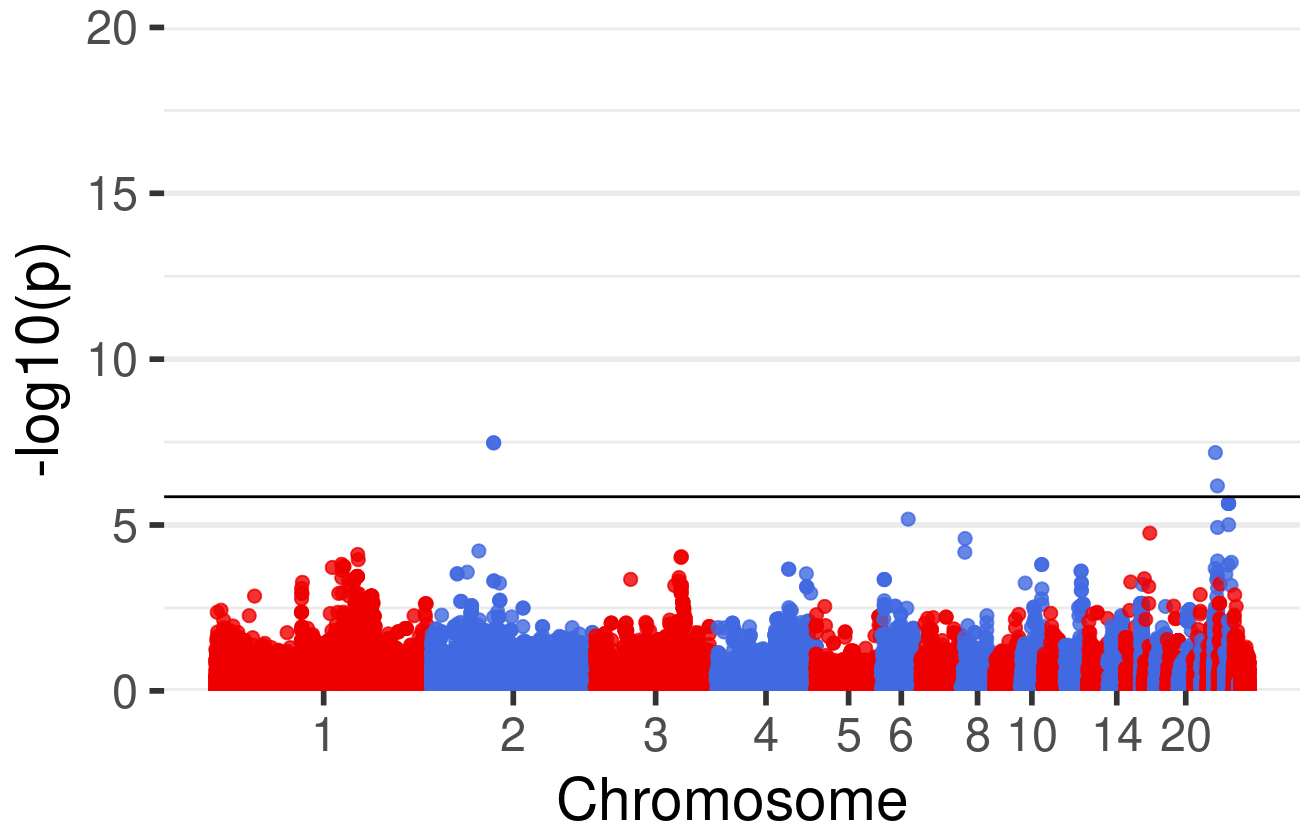

# LOC112532751

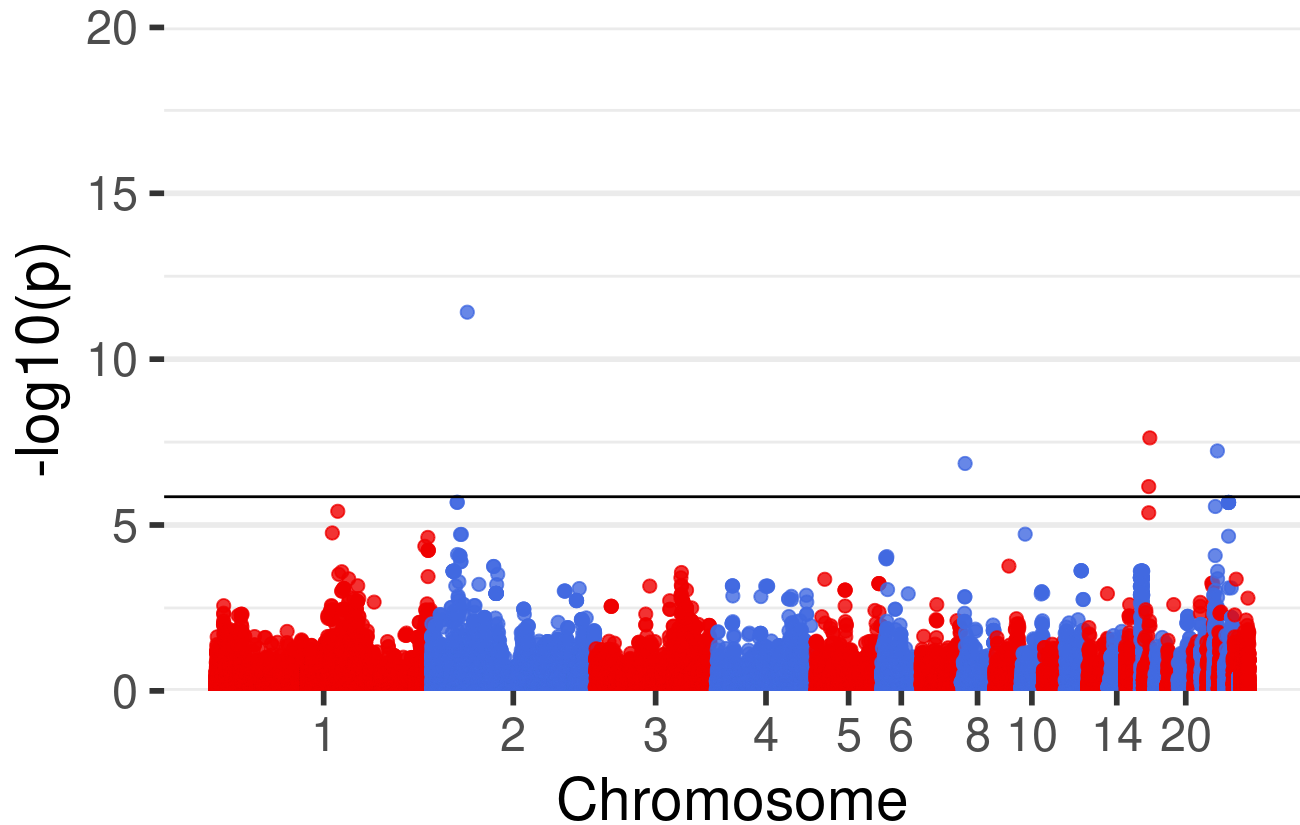





# LOC112533169

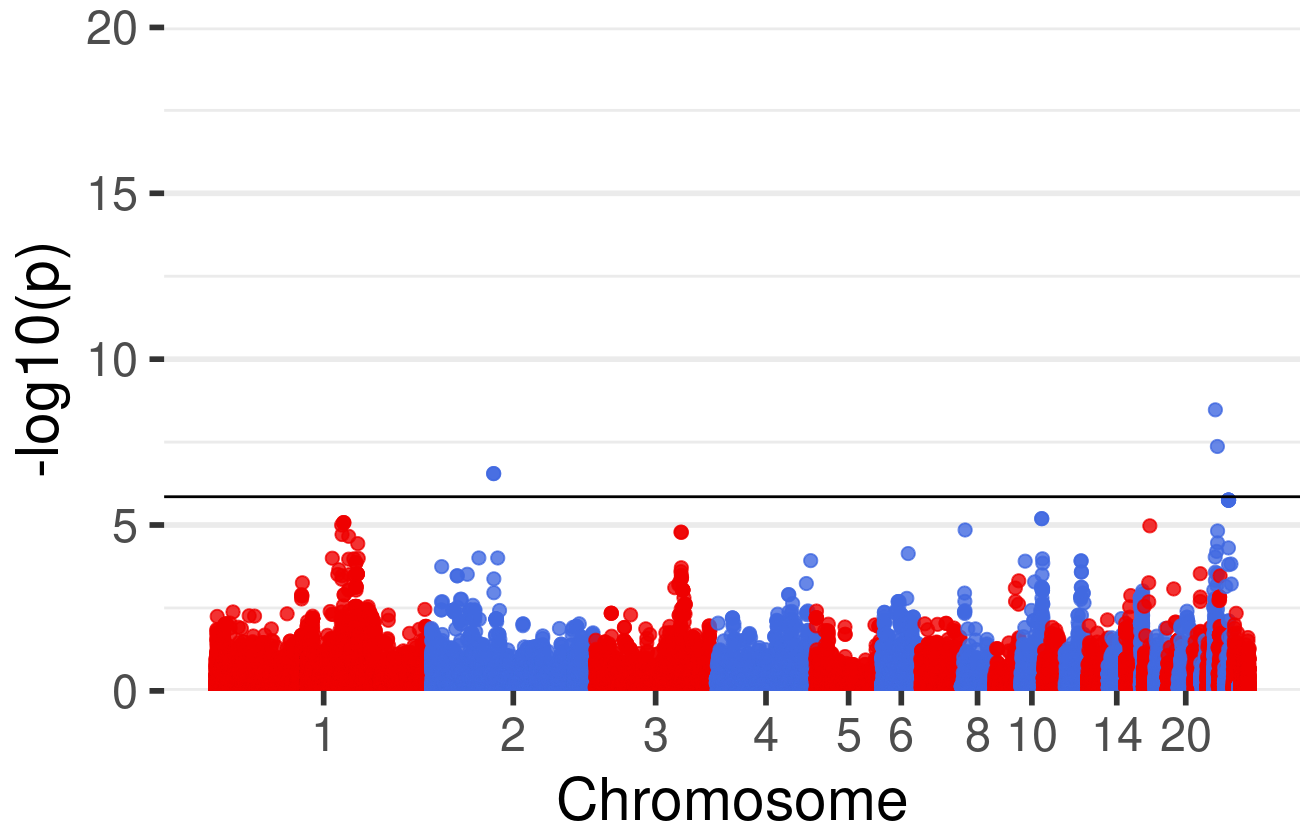

# LOC112533535

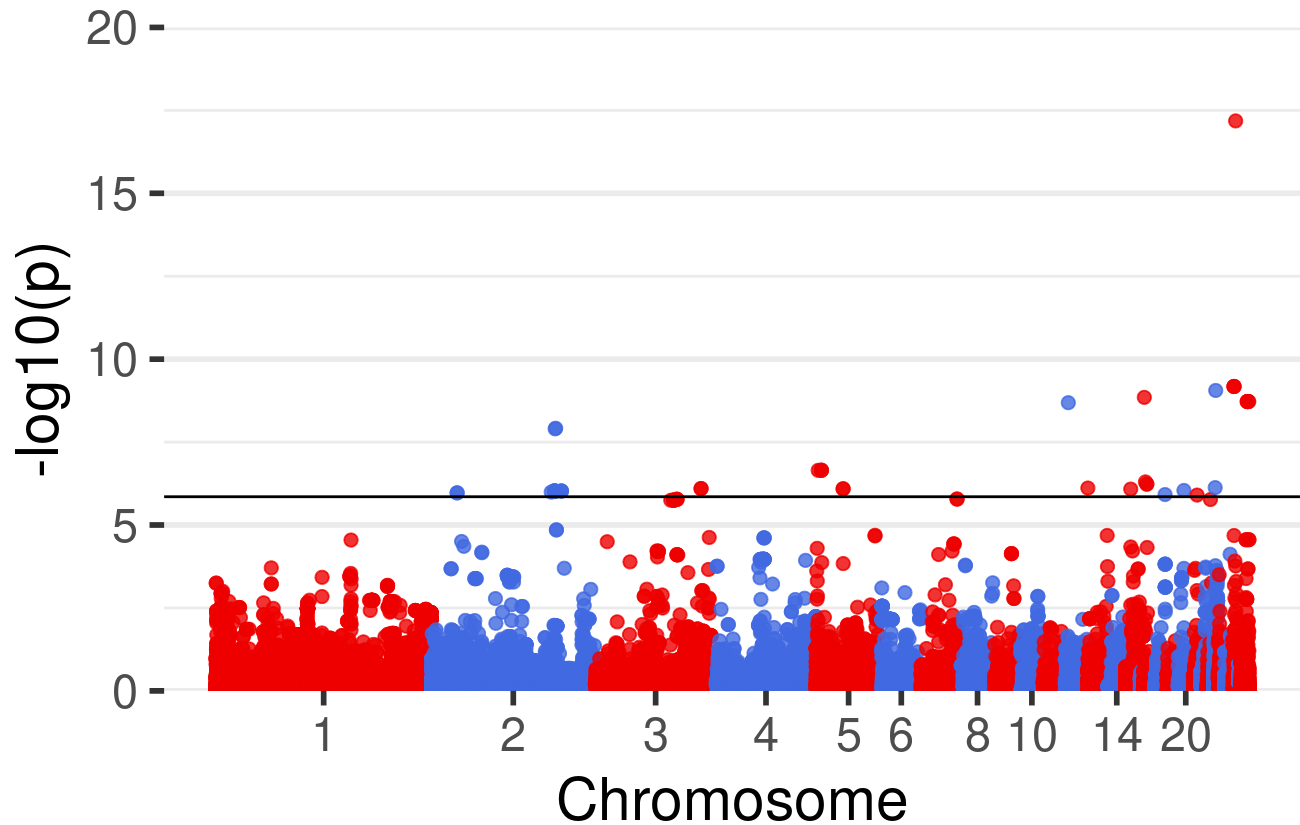

# LOC112533562

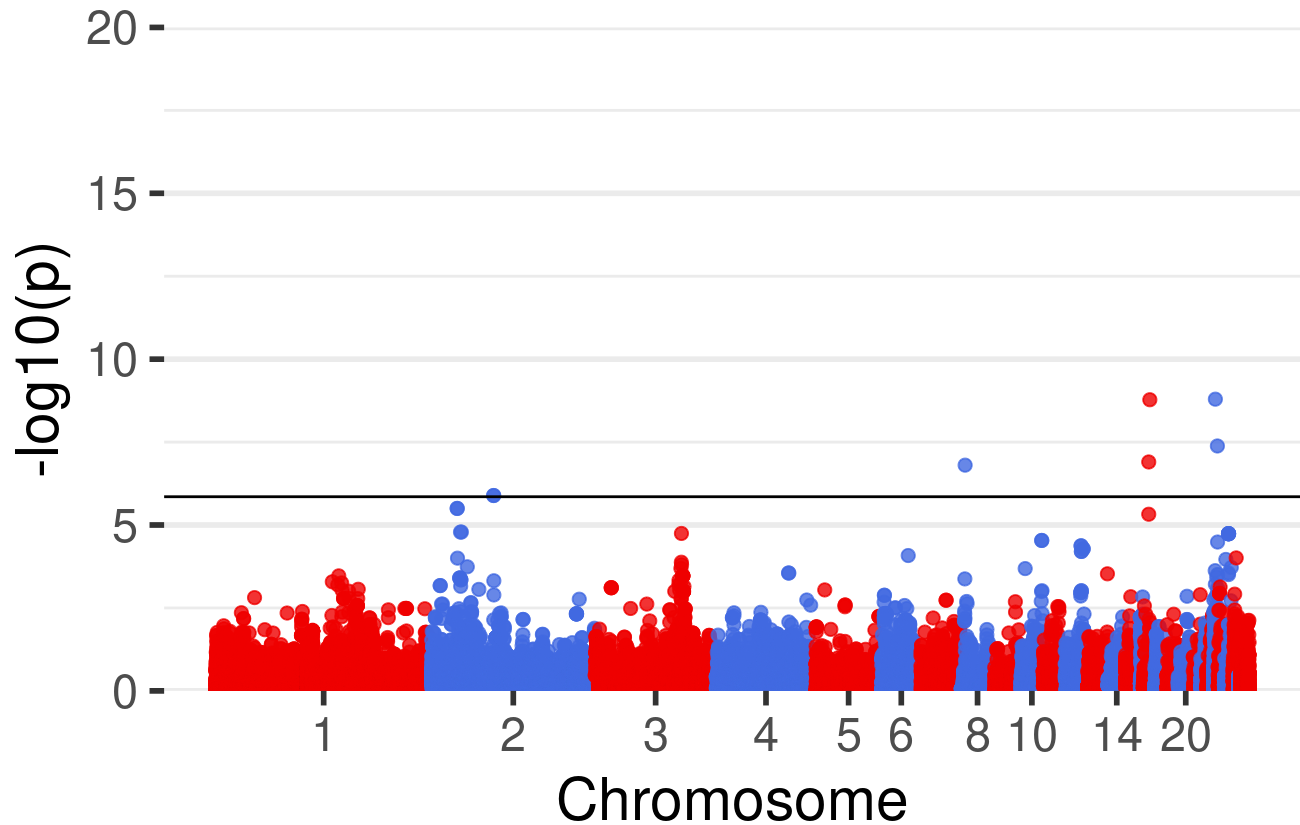

# LOC422393

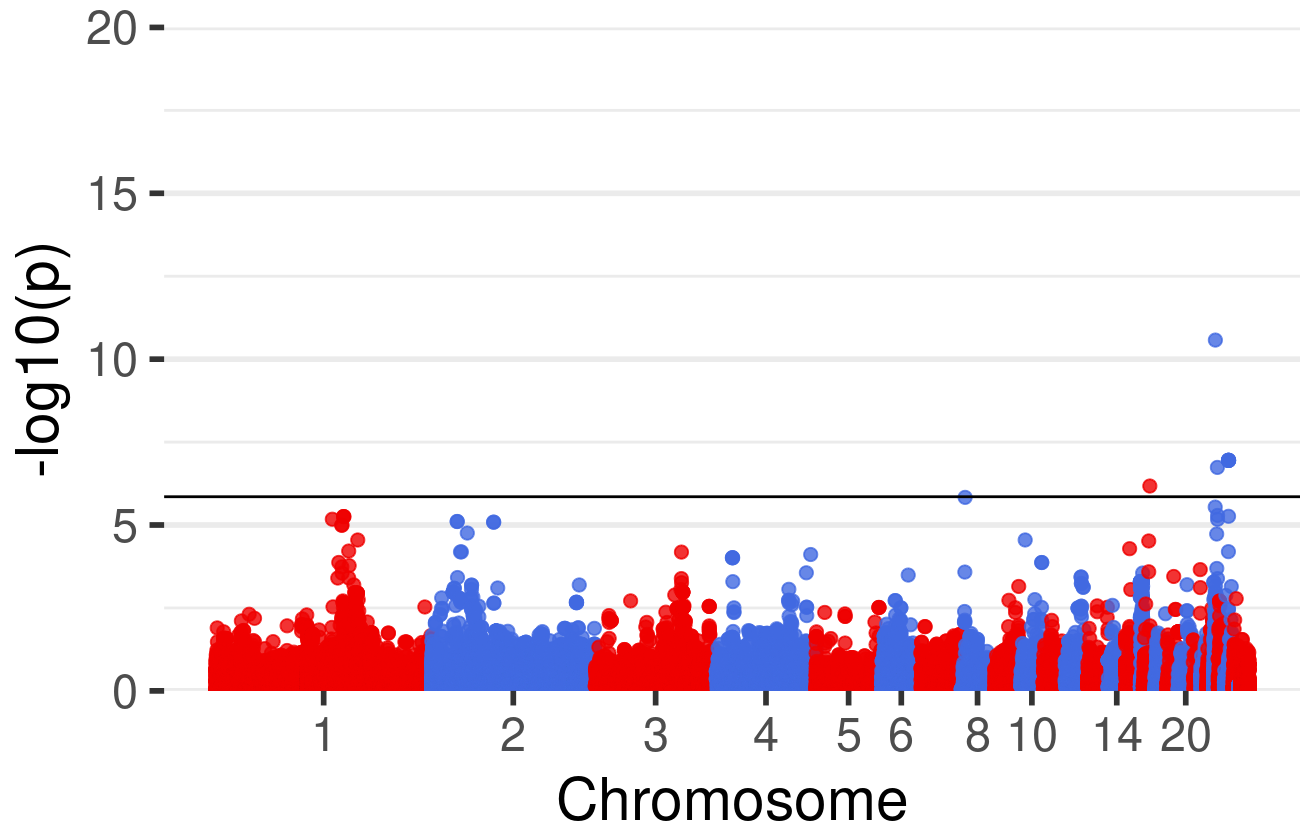

# LOC769512

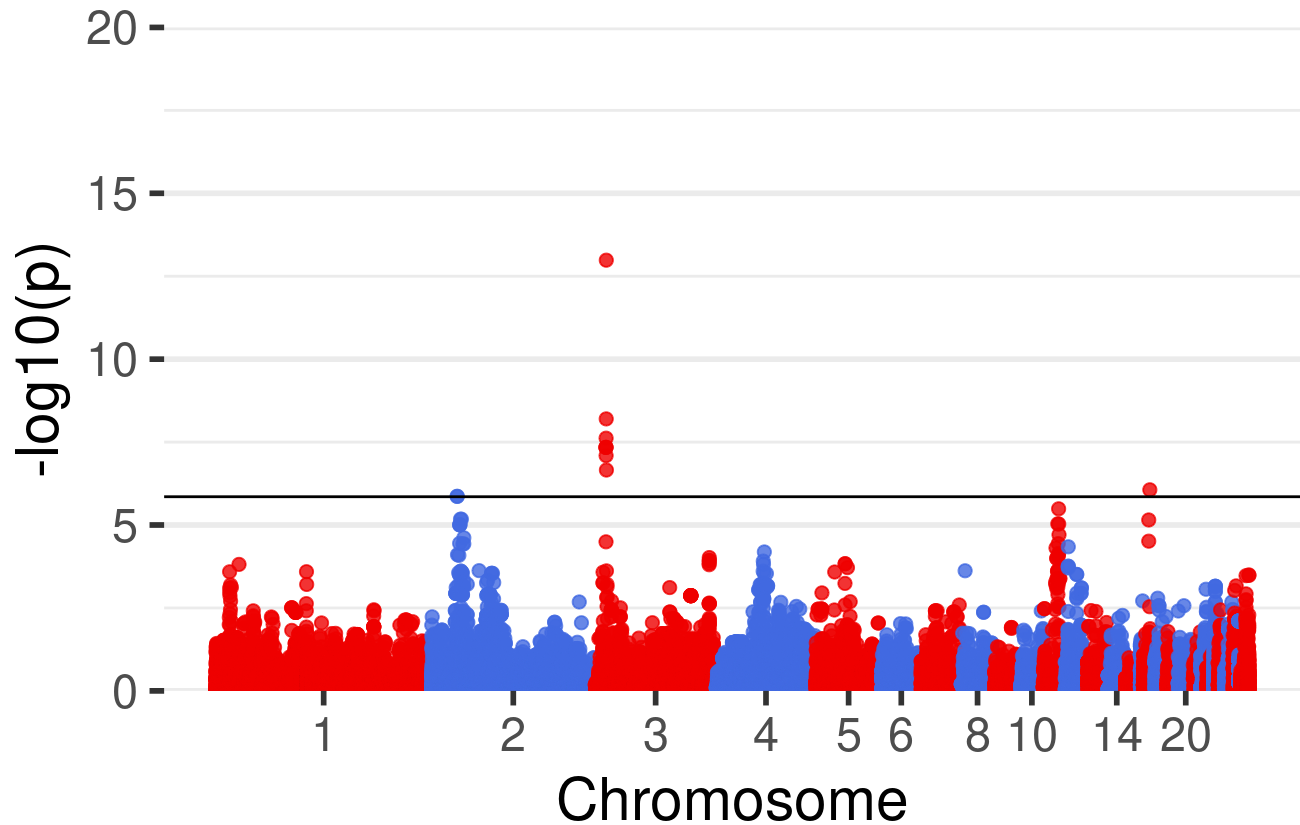

# LOC770352

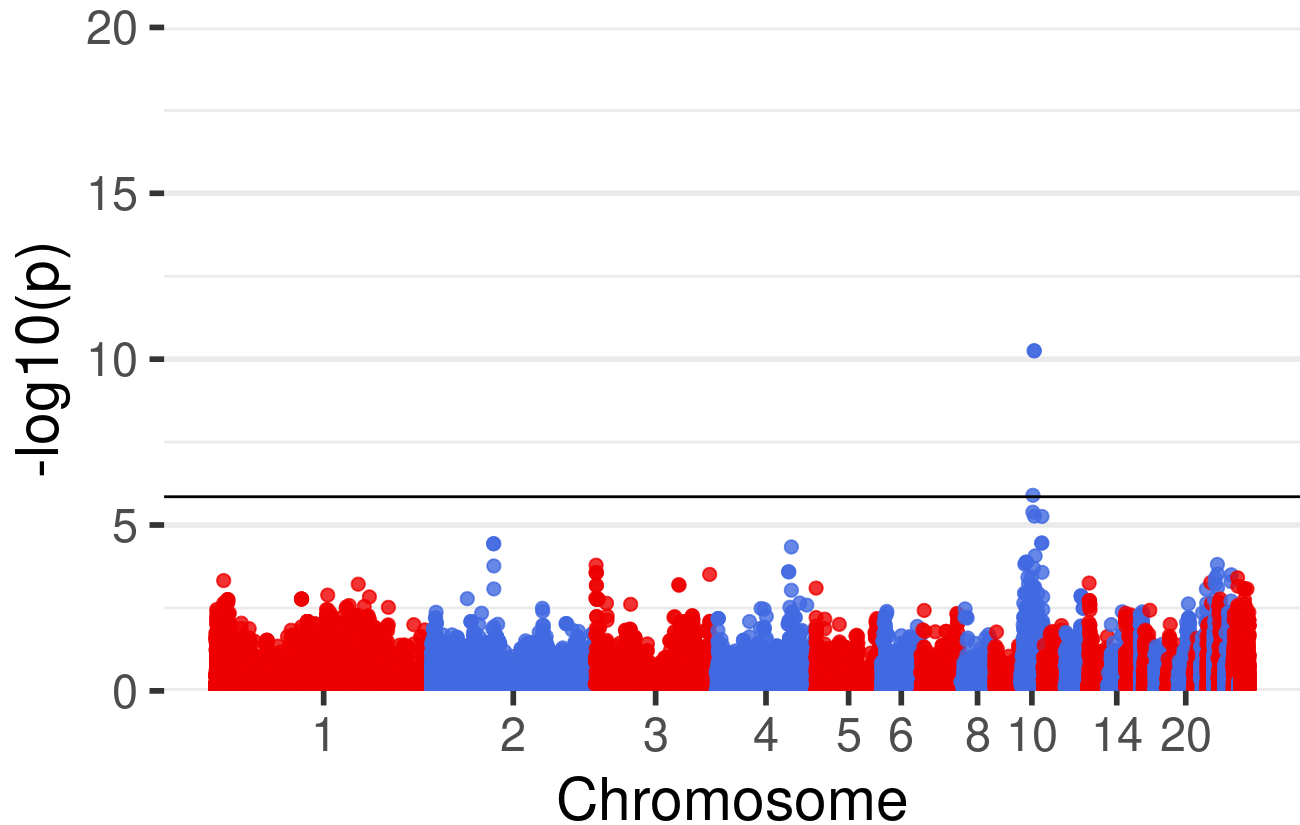

# MHCBL1

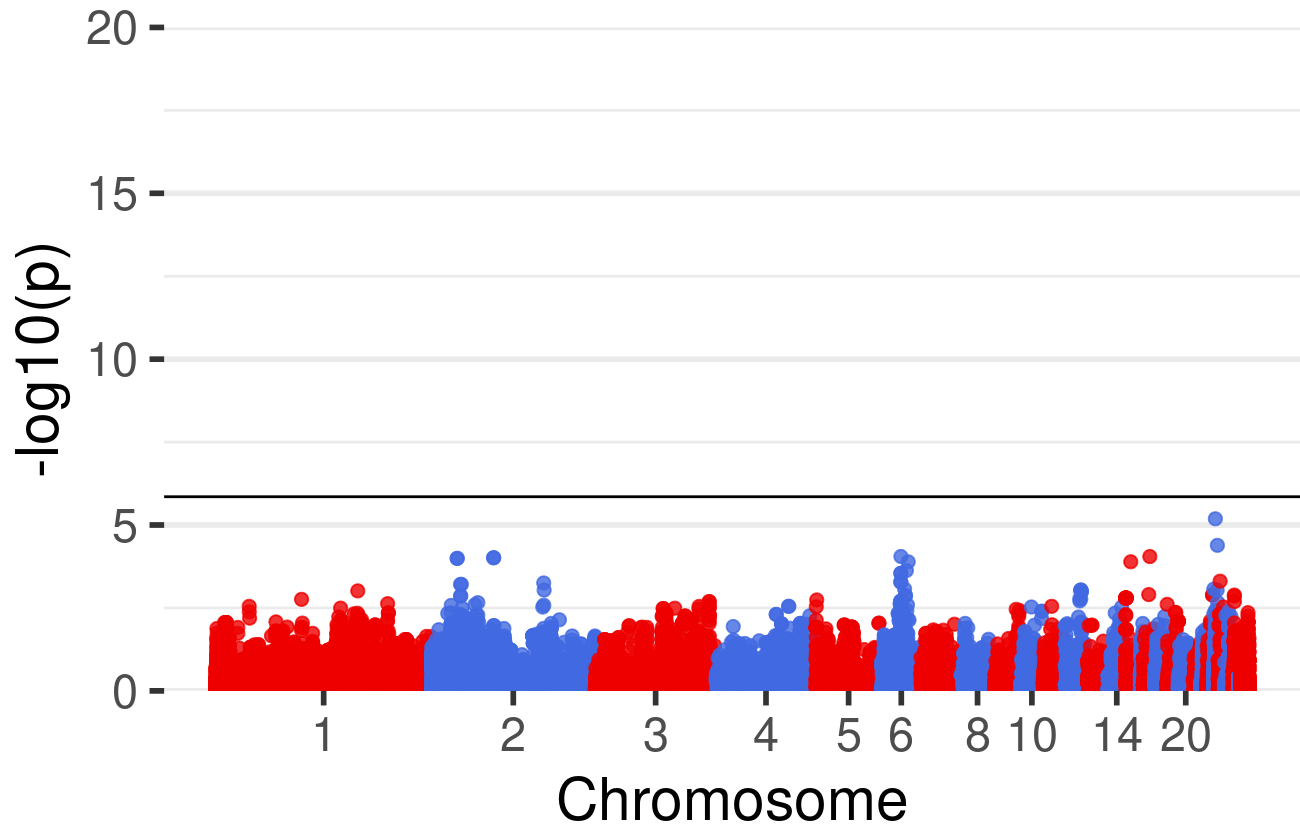



# MHCIA1

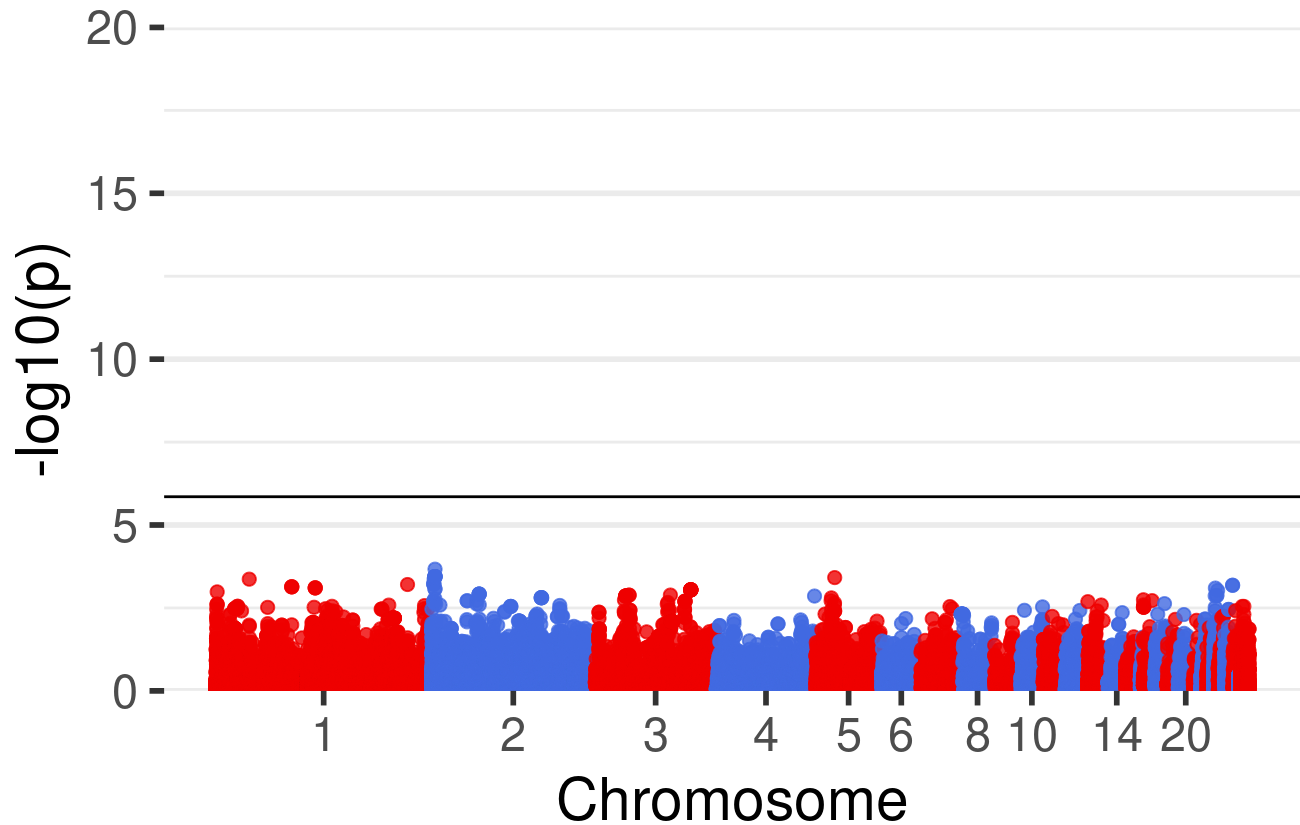

# MHCIA2

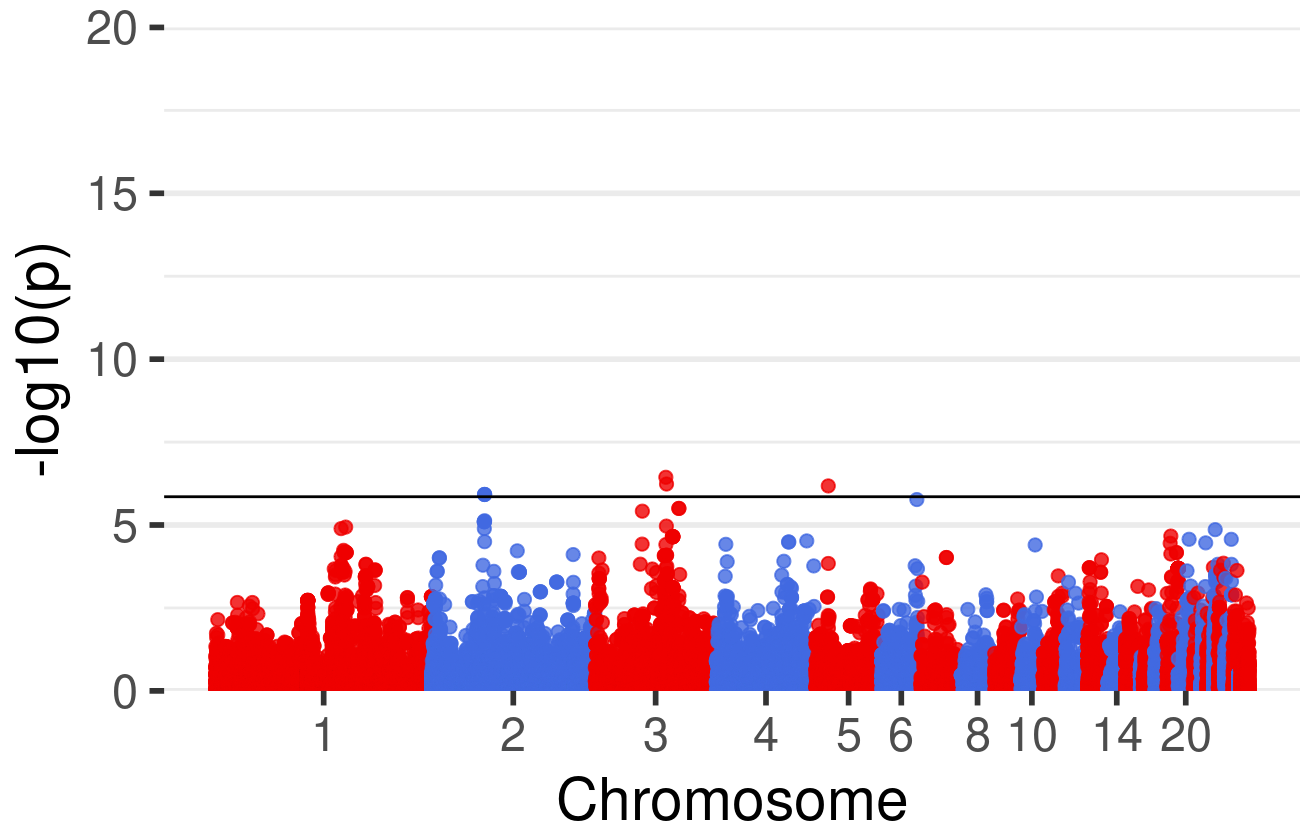

# MHCIA7

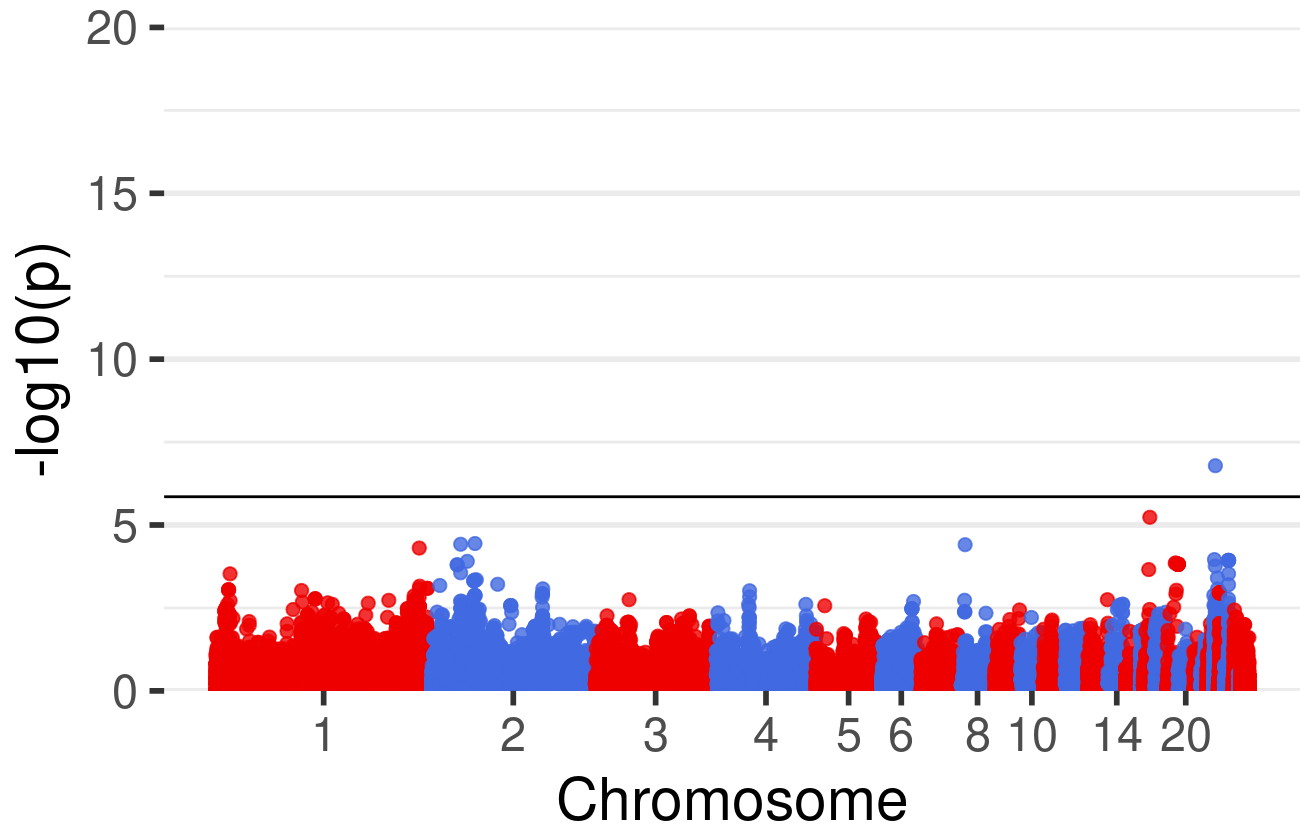

# MICA

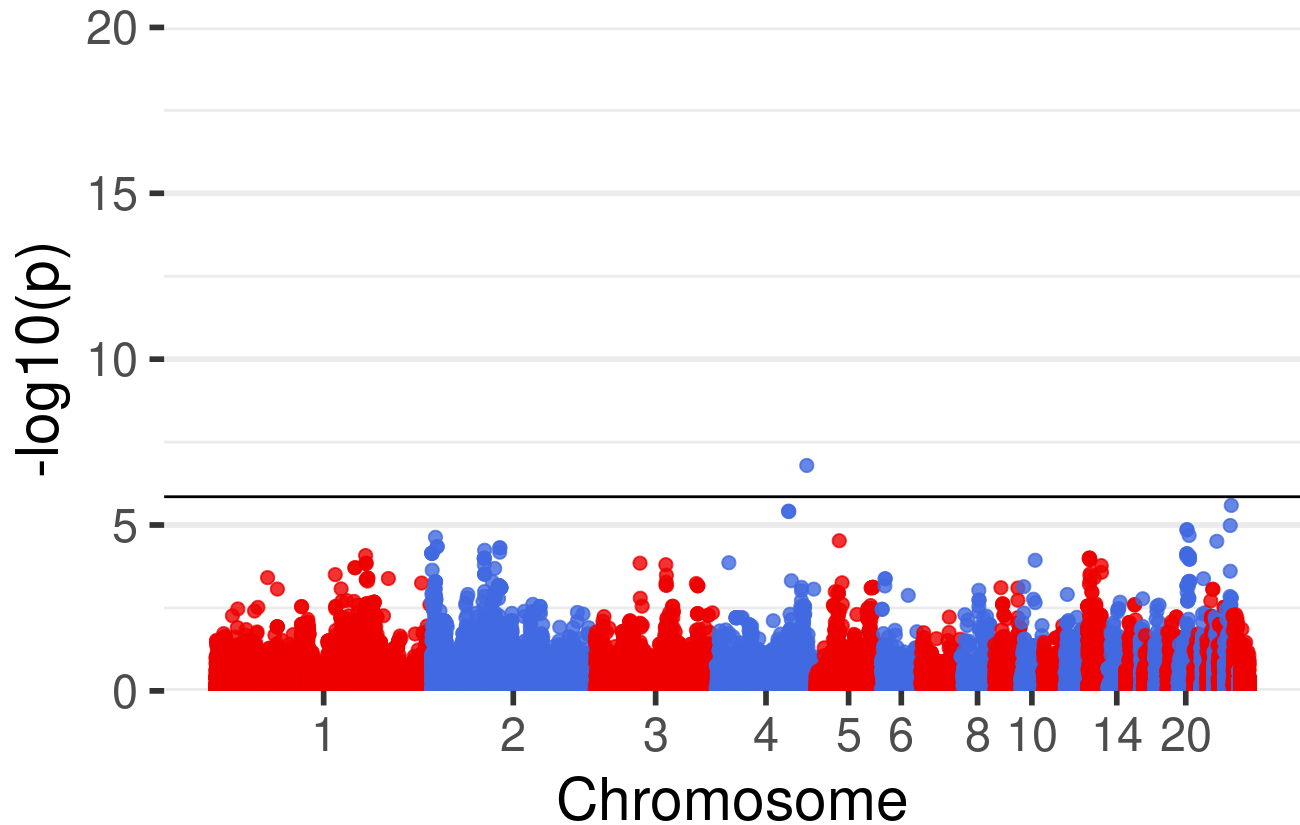

# MIS18BP1

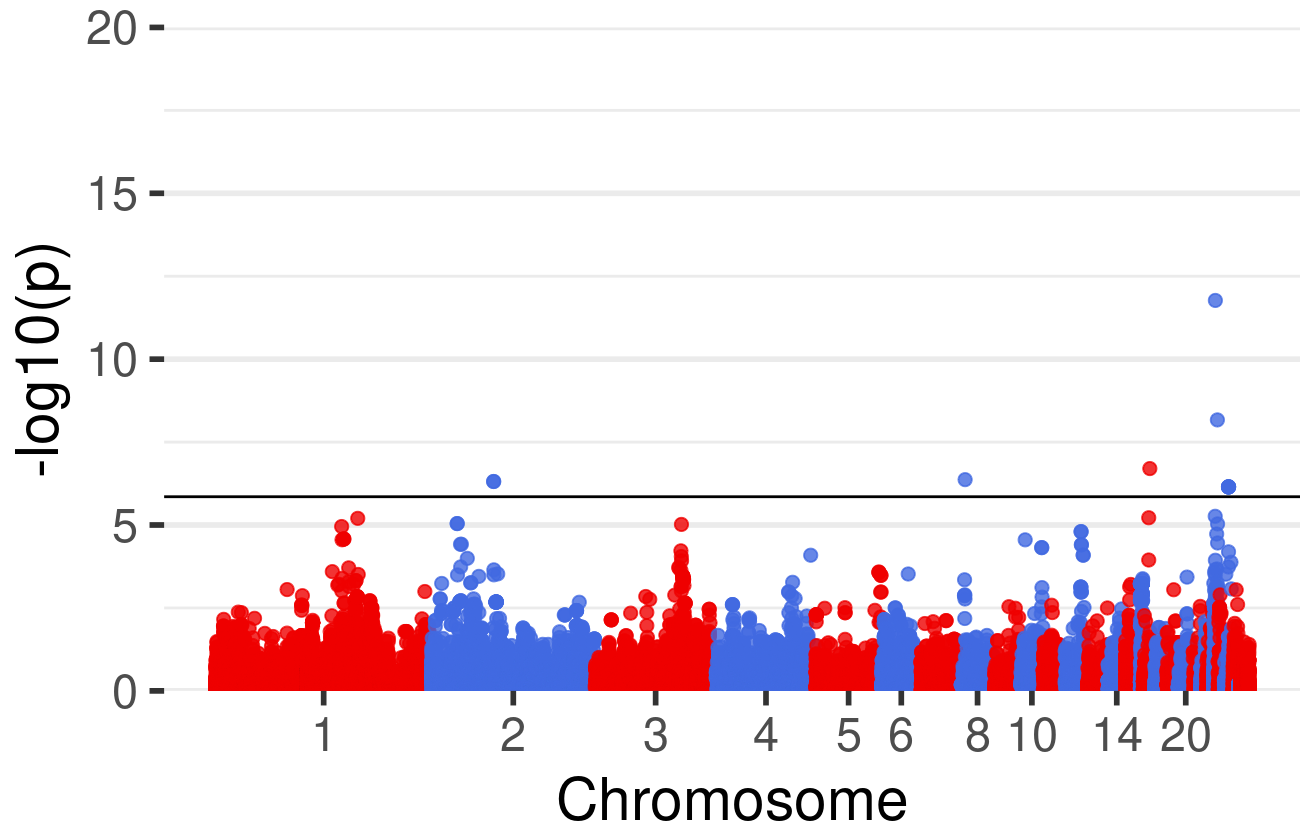

# MOGL4

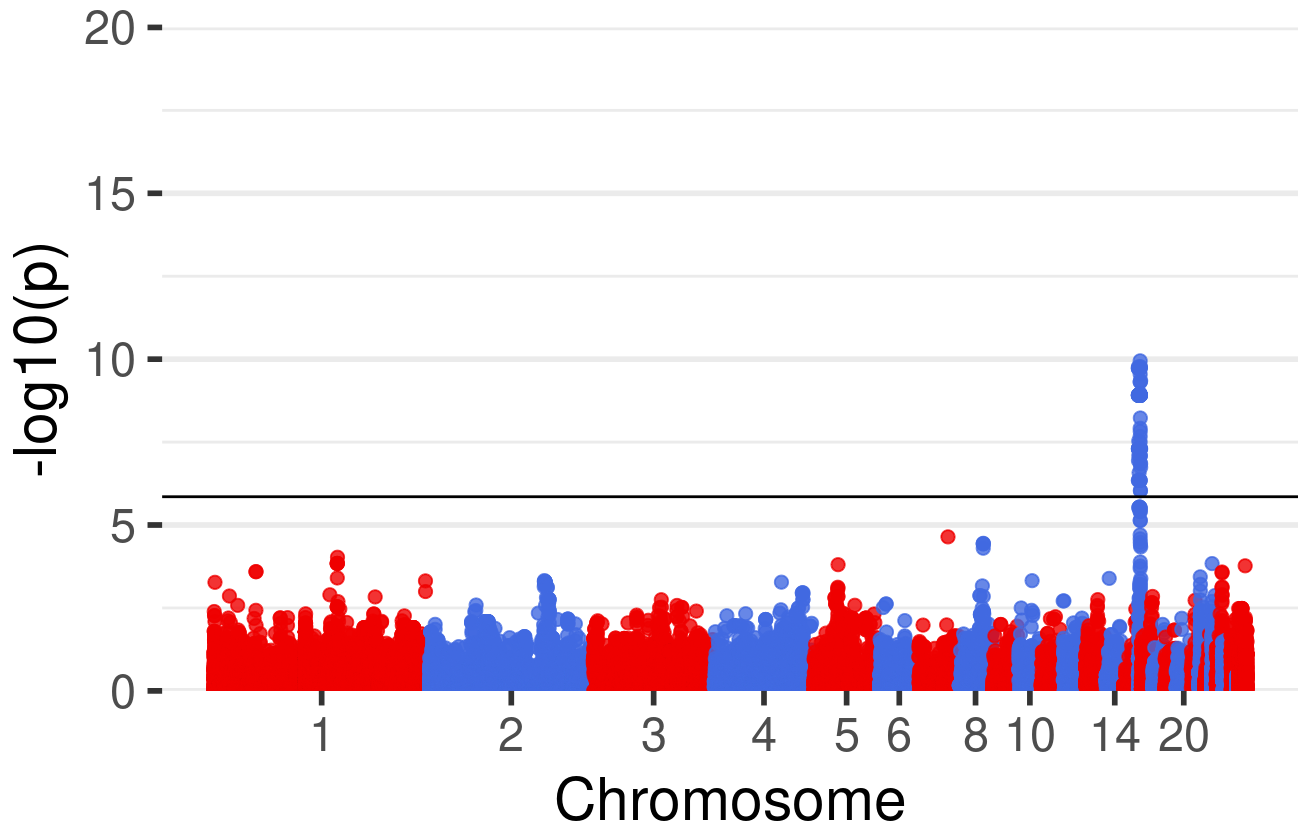

# MROH2B1

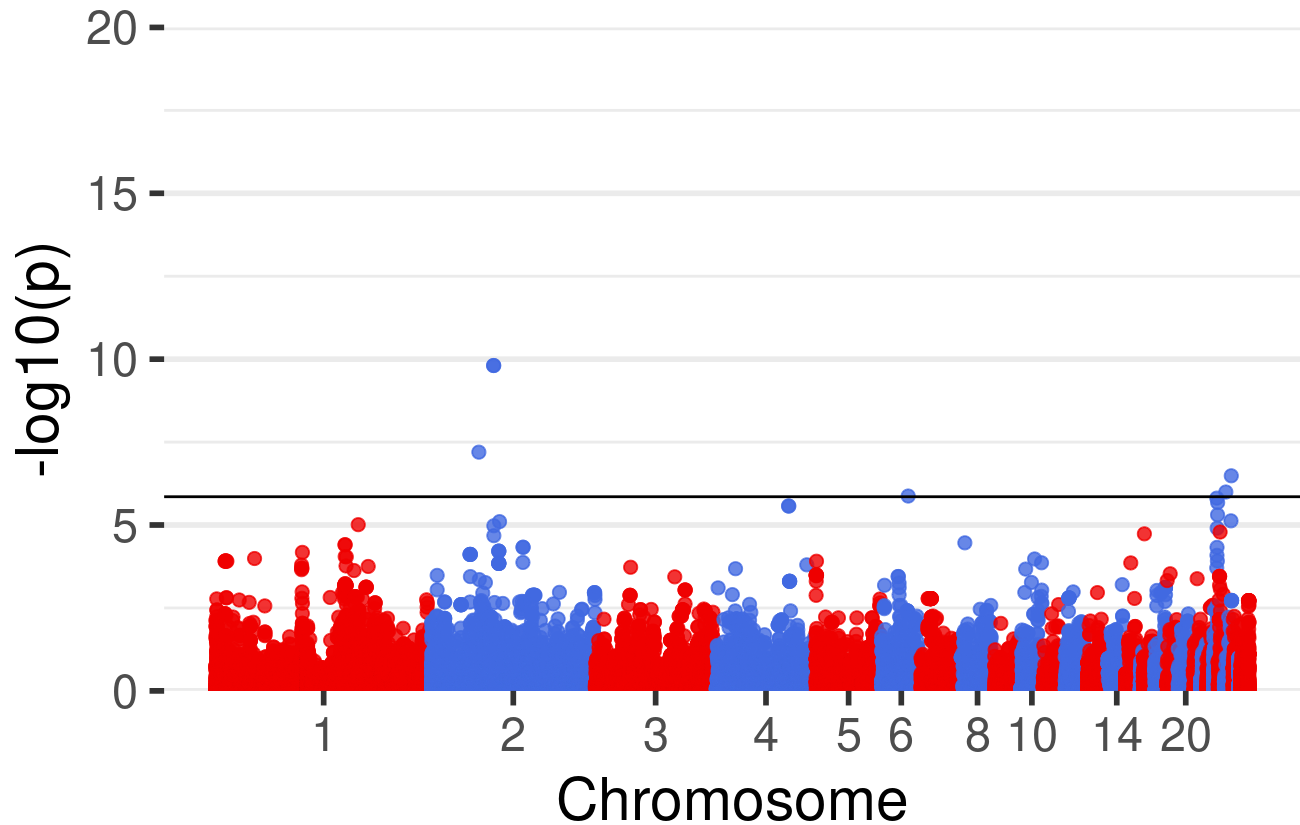

# MUC4

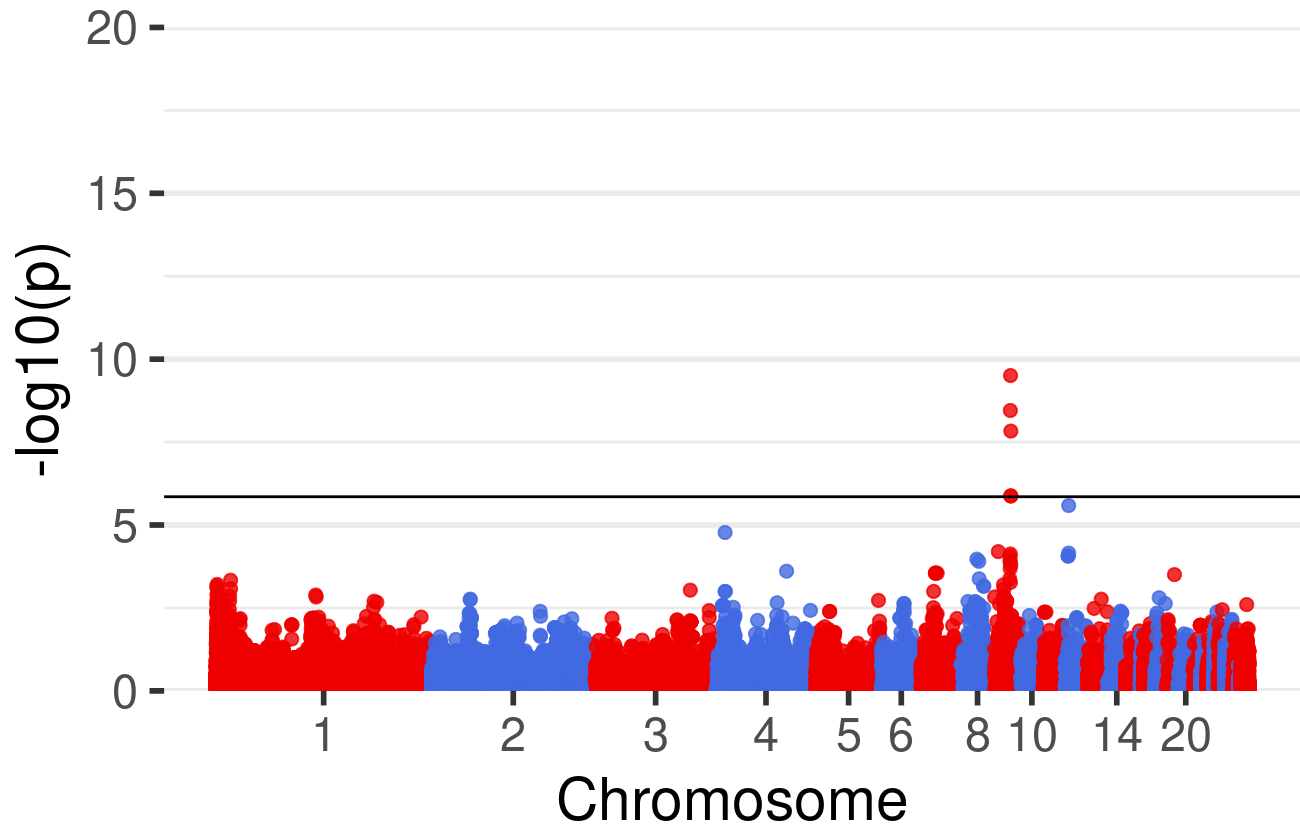



# PER3

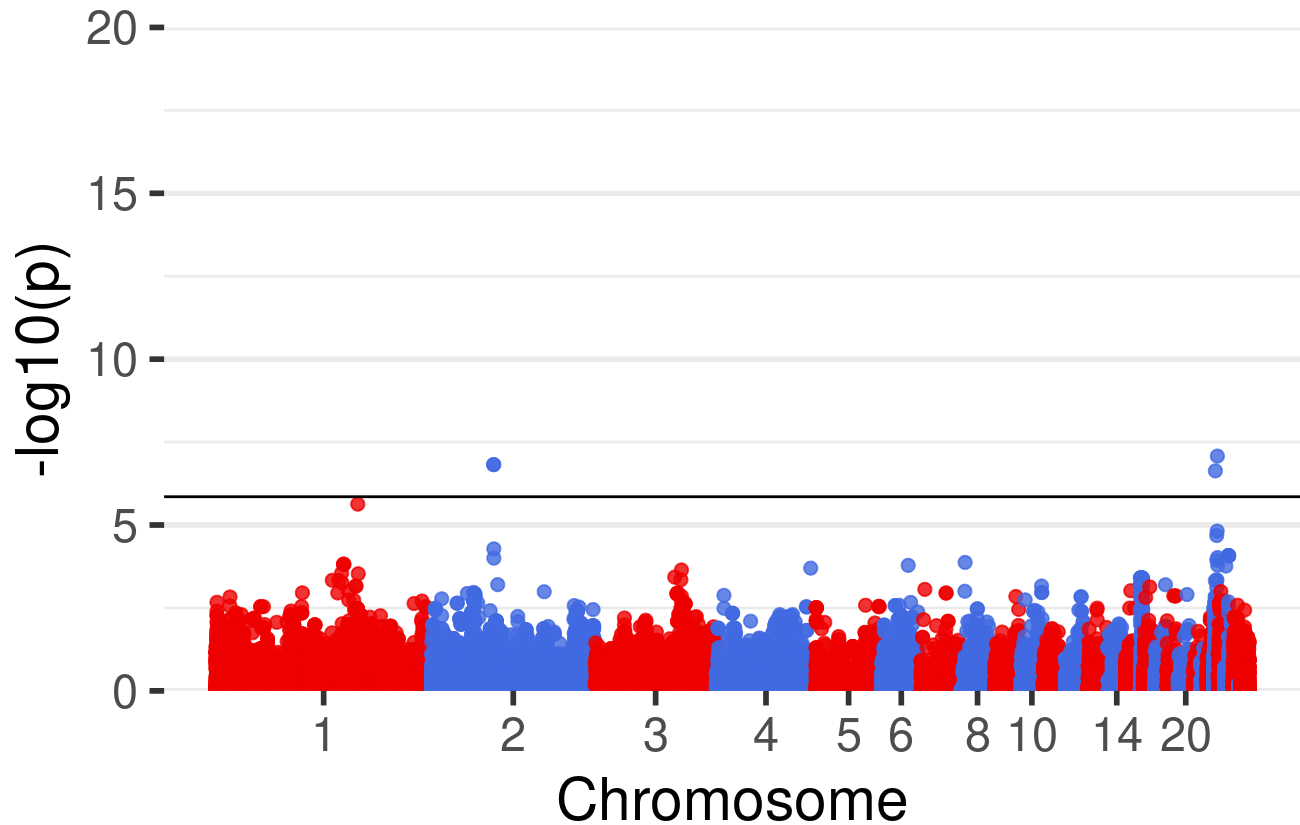

# PNPLA1

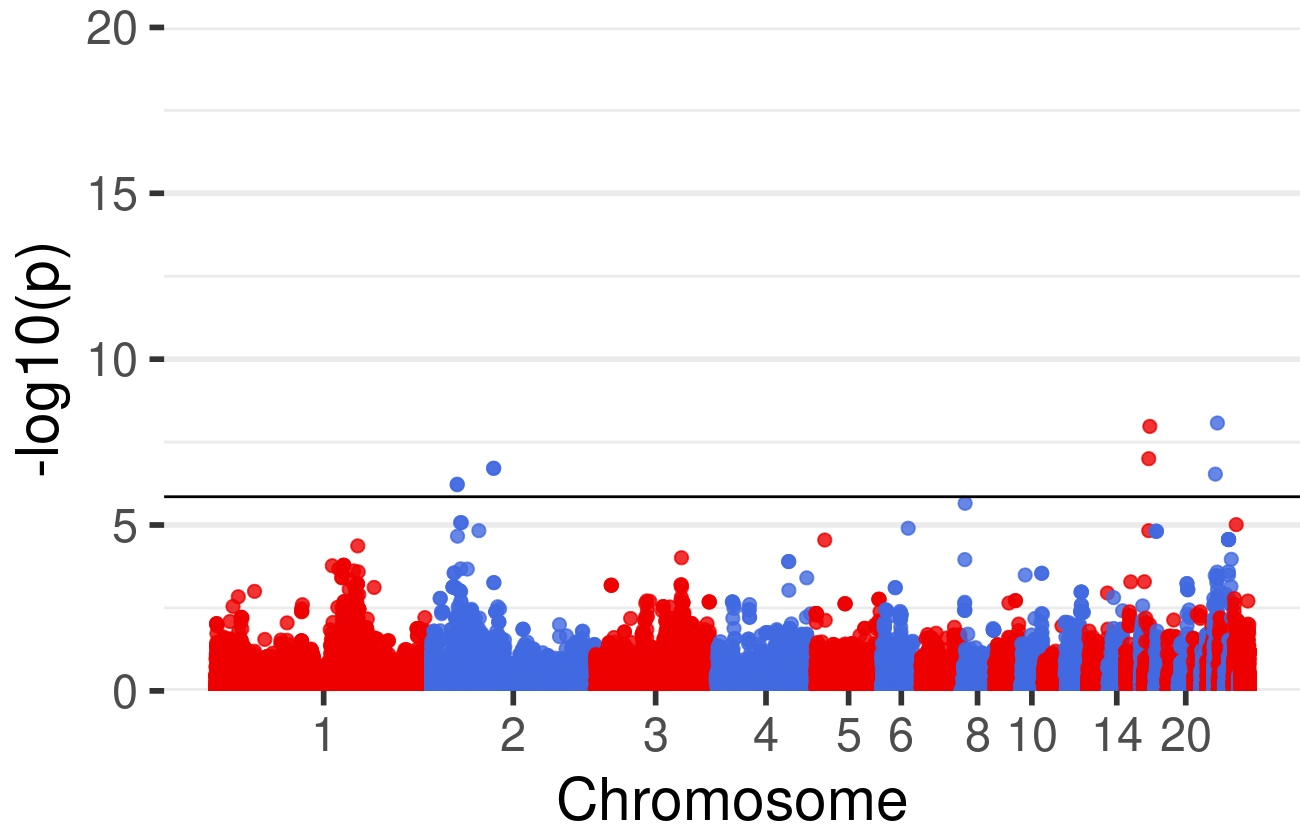

# RASSF8

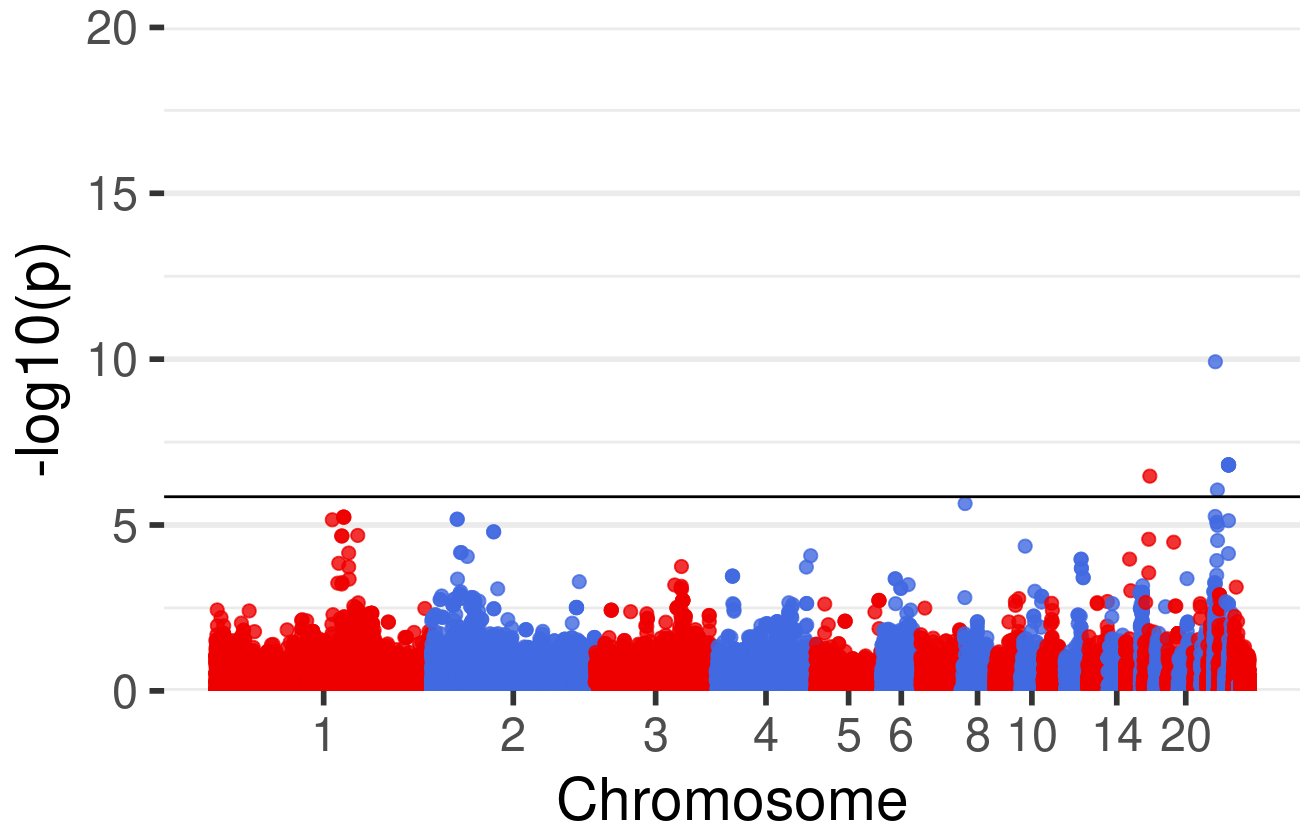

# RNF207

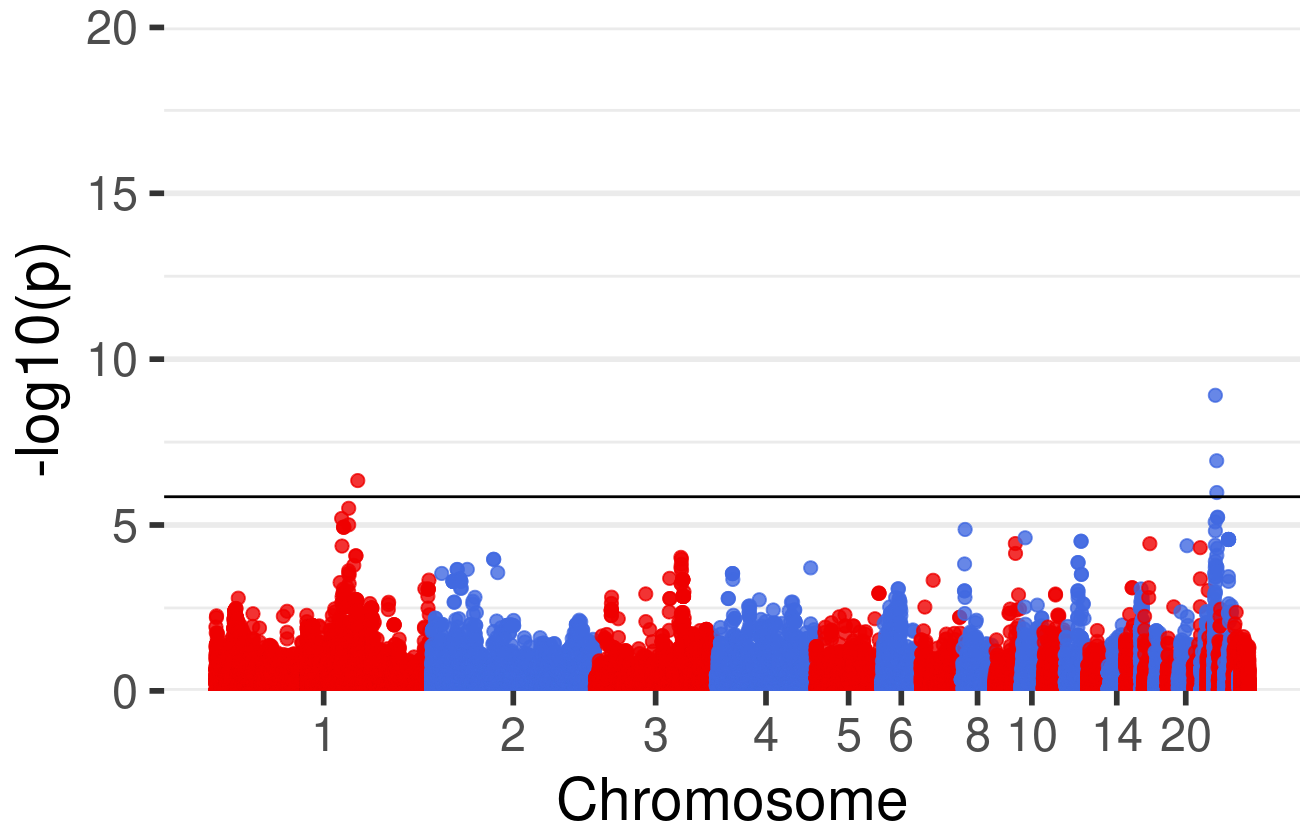

# TRIM27.2

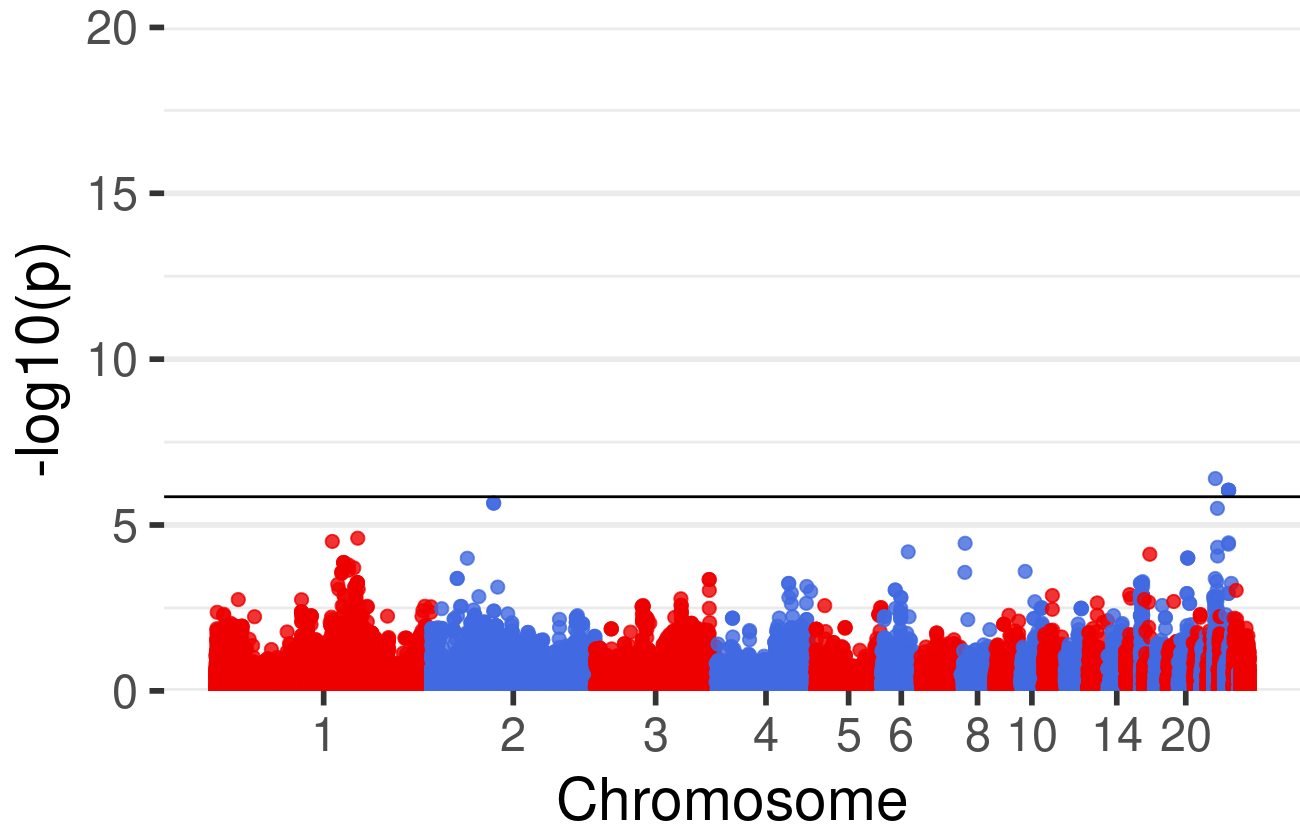

# TRIM63

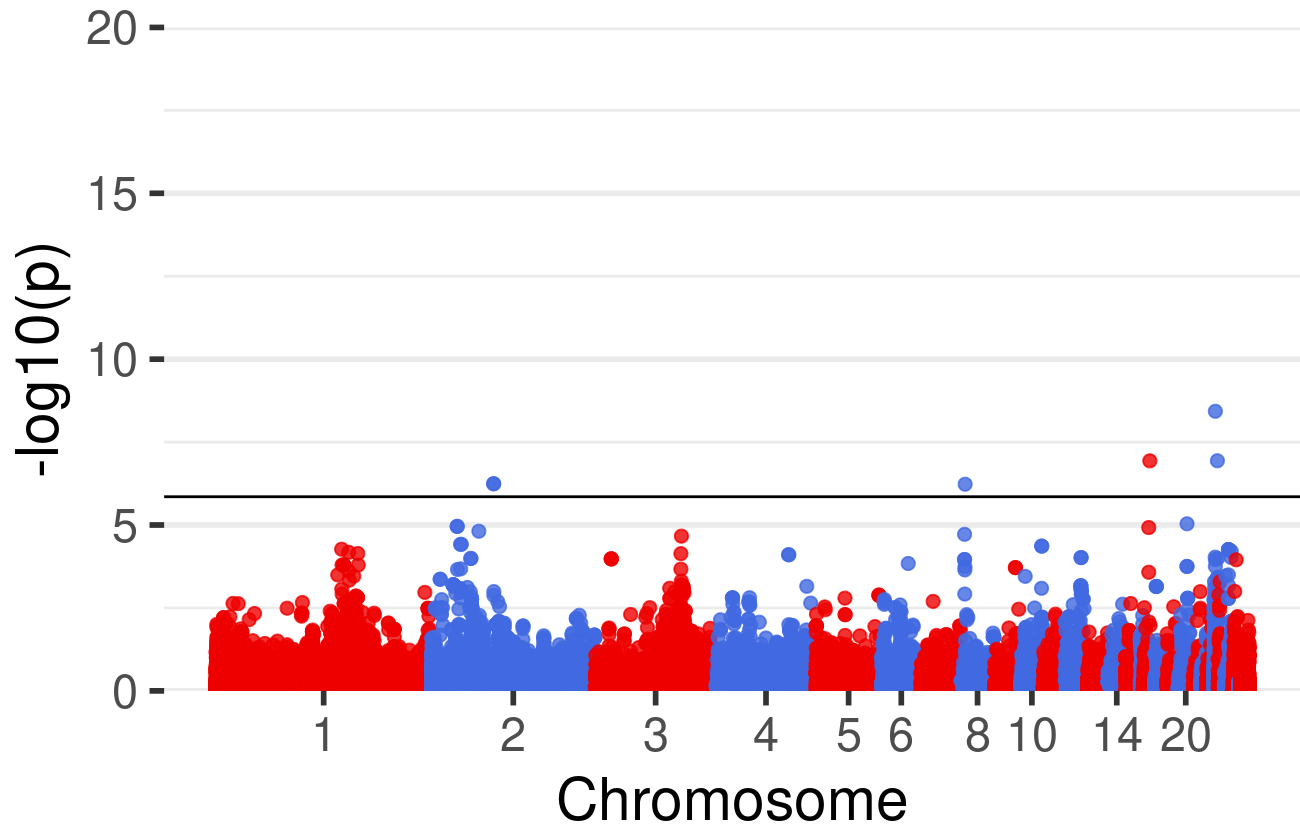

Supplement: Supplementary file [file media-2.pdf]
